# Supplementary material for: High-density genetic linkage map construction and identification of fruit-related QTLs in pear using SNP and SSR markers
Source: PubMed Central journal article supplement (PMC4203118; doi:10.1093/jxb/eru311), 2014-08-16
Supplement: supp_eru311_jexbot122010_file001.pdf [file supp_eru311_jexbot122010_file001.pdf]

## Supplementary data

### High-density genetic linkage map construction and identification of fruit-related QTLs in pear using SNP and SSR markers

Jun Wu<sup>1,4</sup>, Lei-Ting Li<sup>1,4</sup>, Meng Li<sup>1</sup>, M. Awais Khan<sup>2</sup>, Xiu-Gen Li<sup>3</sup>, Hui Chen<sup>1</sup>, Hao Yin<sup>1</sup>, Shao-Ling Zhang<sup>1\*</sup>

1 Center of Pear Engineering Technology Research, Nanjing Agricultural University, Nanjing 210095, China

2 International Potato Center (CIP), Apartado 1558, Lima 12, Peru

3 Zhengzhou Fruit Research Institute, Zhengzhou 450009, China

4 These authors contributed equally to this work

\* Corresponding author

Shao-Ling Zhang<sup>1\*</sup>

Email: slzhang@njau.edu.cn

Telephone: +86 25 84396580

Fax: +86 25 84396485

**Supplemental Table S1.** Statistics of number of reads, clustered tags, filtered tags, and estimation of the depth of filtered tags (Est. depth).

| <b>No. of Individual</b> | <b>Reads</b> | <b>Tags</b> | <b>Filtered tags</b> | <b>Est. depth</b> |
|--------------------------|--------------|-------------|----------------------|-------------------|
| P1                       | 23,951,314   | 1,785,049   | 502,317              | 45.1              |
| P2                       | 15,501,781   | 1,011,547   | 283,132              | 8.4               |
| Ind-1                    | 8,038,382    | 519,929     | 363,735              | 21.7              |
| Ind-2                    | 22,257,512   | 1,666,544   | 458,100              | 26.2              |
| Ind-3                    | 14,859,566   | 683,568     | 414,604              | 35.2              |
| Ind-4                    | 6,524,201    | 924,420     | 398,408              | 15.1              |
| Ind-5                    | 7,202,319    | 490,356     | 352,187              | 20.1              |
| Ind-6                    | 5,350,144    | 1,350,439   | 541,056              | 8.4               |
| Ind-7                    | 8,974,000    | 991,377     | 406,614              | 20.6              |
| Ind-8                    | 14,542,369   | 1,120,753   | 410,904              | 17.6              |
| Ind-9                    | 3,504,890    | 608,010     | 308,171              | 10.4              |
| Ind-10                   | 14,522,499   | 681,114     | 428,987              | 33.3              |
| Ind-11                   | 15,188,673   | 667,166     | 423,521              | 35.3              |
| Ind-12                   | 15,830,898   | 677,229     | 405,827              | 38.3              |
| Ind-13                   | 15,850,193   | 1,142,961   | 412,519              | 19.1              |
| Ind-14                   | 14,652,153   | 643,631     | 405,003              | 35.6              |
| Ind-15                   | 16,839,538   | 666,560     | 394,840              | 42.0              |
| Ind-16                   | 17,600,413   | 1,297,172   | 432,654              | 20.6              |
| Ind-17                   | 4,815,317    | 391,132     | 286,023              | 16.5              |
| Ind-18                   | 5,525,028    | 406,924     | 298,601              | 18.1              |
| Ind-19                   | 36,463       | 8,685       | 5,705                | 5.9               |
| Ind-20                   | 8,786,875    | 505,638     | 349,254              | 24.7              |
| Ind-21                   | 13,585,239   | 1,423,757   | 468,812              | 26.9              |
| Ind-22                   | 13,850,778   | 694,171     | 433,069              | 31.4              |
| Ind-23                   | 4,593,320    | 724,093     | 356,266              | 11.9              |
| Ind-24                   | 6,686,767    | 447,822     | 327,706              | 20.0              |
| Ind-25                   | 14,221,257   | 798,241     | 434,832              | 31.9              |
| Ind-26                   | 8,144,125    | 997,019     | 418,850              | 18.1              |
| Ind-27                   | 6,594,786    | 543,764     | 358,602              | 17.9              |
| Ind-28                   | 8,933,617    | 793,487     | 347,115              | 12.2              |
| Ind-29                   | 16,117,799   | 837,340     | 410,847              | 38.2              |
| Ind-30                   | 13,032,946   | 775,526     | 409,193              | 31.0              |
| Ind-31                   | 4,650,154    | 821,047     | 356,612              | 11.7              |
| Ind-32                   | 9,485,728    | 1,042,006   | 403,223              | 21.9              |
| Ind-33                   | 4,921,426    | 751,025     | 347,215              | 13.0              |
| Ind-34                   | 12,202,011   | 781,593     | 426,877              | 27.8              |
| Ind-35                   | 18,422,874   | 952,474     | 456,194              | 39.3              |
| Ind-36                   | 10,905,617   | 1,171,628   | 428,593              | 23.7              |
| Ind-37                   | 4,156,244    | 422,090     | 285,493              | 14.1              |
| Ind-38                   | 10,511,384   | 654,776     | 402,593              | 25.5              |

|        |            |           |           |      |
|--------|------------|-----------|-----------|------|
| Ind-39 | 10,810,743 | 1,211,446 | 426,398   | 23.5 |
| Ind-40 | 10,233,784 | 1,091,472 | 442,316   | 21.7 |
| Ind-41 | 8,247,139  | 1,031,582 | 403,099   | 18.9 |
| Ind-42 | 7,989,468  | 626,379   | 374,778   | 20.6 |
| Ind-43 | 15,341,216 | 853,454   | 445,399   | 33.5 |
| Ind-44 | 19,038,023 | 985,640   | 442,809   | 41.8 |
| Ind-45 | 4,353,278  | 733,978   | 341,061   | 11.6 |
| Ind-46 | 11,088,640 | 1,185,462 | 505,844   | 20.6 |
| Ind-47 | 9,199,110  | 1,007,067 | 416,437   | 20.7 |
| Ind-48 | 23,478,869 | 1,117,662 | 485,868   | 47.0 |
| Ind-49 | 8,255,437  | 546,813   | 329,605   | 24.4 |
| Ind-50 | 10,565,419 | 1,191,708 | 425,305   | 23.0 |
| Ind-51 | 11,582,911 | 1,188,271 | 423,050   | 25.6 |
| Ind-52 | 8,252,543  | 925,464   | 393,589   | 19.6 |
| Ind-53 | 6,966,164  | 680,882   | 397,727   | 16.8 |
| Ind-54 | 2,917,686  | 525,735   | 265,049   | 10.0 |
| Ind-55 | 8,529,294  | 986,101   | 404,980   | 19.6 |
| Ind-56 | 5,588,400  | 609,609   | 356,022   | 15.0 |
| Ind-57 | 10,323,631 | 870,621   | 435,835   | 22.7 |
| Ind-58 | 133,997    | 52,545    | 19,391    | 5.2  |
| Ind-59 | 13,114,301 | 1,024,898 | 459,806   | 27.3 |
| Ind-60 | 5,258,426  | 763,812   | 378,273   | 12.9 |
| Ind-61 | 9,970,226  | 1,072,239 | 424,206   | 22.0 |
| Ind-62 | 10,985,205 | 1,174,556 | 448,816   | 22.9 |
| Ind-63 | 37,137,876 | 3,365,480 | 1,000,309 | 34.8 |
| Ind-64 | 13,685,765 | 1,008,113 | 456,550   | 28.8 |
| Ind-65 | 10,639,579 | 1,108,918 | 434,288   | 22.9 |
| Ind-66 | 15,456,530 | 1,340,411 | 464,490   | 31.4 |
| Ind-67 | 9,199,608  | 794,412   | 414,284   | 21.3 |
| Ind-68 | 4,753,897  | 574,882   | 345,566   | 13.1 |
| Ind-69 | 9,009,757  | 993,147   | 414,647   | 20.3 |
| Ind-70 | 11,893,161 | 906,829   | 437,956   | 26.1 |
| Ind-71 | 20,776,358 | 1,338,156 | 496,777   | 40.1 |
| Ind-72 | 8,880,482  | 987,439   | 415,532   | 20.0 |
| Ind-73 | 11,599,724 | 1,604,344 | 564,115   | 18.7 |
| Ind-74 | 7,918,992  | 670,632   | 368,246   | 20.7 |
| Ind-75 | 11,264,772 | 1,218,633 | 462,132   | 22.7 |
| Ind-76 | 7,163,076  | 952,884   | 403,055   | 16.4 |
| Ind-77 | 10,042,687 | 1,077,836 | 427,734   | 22.0 |
| Ind-78 | 7,028,212  | 882,667   | 394,084   | 16.6 |
| Ind-79 | 17,689,383 | 1,226,365 | 487,881   | 34.7 |
| Ind-80 | 8,624,838  | 716,947   | 396,830   | 20.9 |
| Ind-81 | 10,381,281 | 803,830   | 413,252   | 24.2 |
| Ind-82 | 5,048,149  | 769,523   | 358,984   | 12.9 |

|              |                      |                   |                   |             |
|--------------|----------------------|-------------------|-------------------|-------------|
| Ind-83       | 13,172,348           | 1,230,385         | 449,725           | 27.6        |
| Ind-84       | 9,121,836            | 1,064,193         | 466,199           | 18.3        |
| Ind-85       | 16,137,868           | 1,450,902         | 474,305           | 32.0        |
| Ind-86       | 7,664,449            | 932,445           | 395,743           | 18.0        |
| Ind-87       | 6,106,378            | 824,062           | 382,216           | 14.8        |
| Ind-88       | 5,967,141            | 660,675           | 360,025           | 15.7        |
| Ind-89       | 6,017,717            | 1,017,082         | 506,158           | 10.9        |
| Ind-90       | 8,051,103            | 937,170           | 397,578           | 18.9        |
| Ind-91       | 9,852,052            | 630,913           | 287,994           | 9.5         |
| Ind-92       | 6,849,643            | 470,754           | 150,790           | 5.1         |
| Ind-93       | 4,024,415            | 485,184           | 306,421           | 12.6        |
| Ind-94       | 11,887,026           | 872,295           | 420,339           | 27.2        |
| Ind-95       | 20,118,694           | 1,285,915         | 395,436           | 15.2        |
| Ind-96       | 8,418,444            | 698,014           | 407,618           | 19.9        |
| Ind-97       | 10,855,839           | 717,527           | 382,860           | 27.5        |
| Ind-98       | 17,362,214           | 1,050,982         | 457,417           | 36.7        |
| Ind-99       | 2,225,520            | 229,822           | 44,336            | 4.8         |
| Ind-100      | 11,152,511           | 736,696           | 384,826           | 28.1        |
| Ind-101      | 23,832,461           | 1,318,209         | 491,795           | 46.8        |
| Ind-102      | 5,730,555            | 558,262           | 343,977           | 16.0        |
| <b>Total</b> | <b>1,116,336,851</b> | <b>93,842,394</b> | <b>41,462,387</b> | <b>23.9</b> |

**Supplemental Table S2.** Comparison of SSR markers with previously published linkage maps

| LG | Map pos. (cM) | Marker name  | Yamamoto et al., 2007 |           | Terakami et al., 2009 | HiDRAS |           |
|----|---------------|--------------|-----------------------|-----------|-----------------------|--------|-----------|
|    |               |              | Barlett               | La France | Housui                | Fiesta | Discovery |
| 1  | 88.6          | KA4b         | 59.3                  |           | 58.7                  | 53.5   | 42.6      |
| 1  | 90.8          | NH010a       | 69.1                  |           |                       |        |           |
| 1  | 92.0          | CH05g08      | 70.2                  |           |                       | 69.9   | 77.4      |
| 2  | 78.9          | BGT23b       | 29.2                  | 36.3      | 0                     |        |           |
| 2  | 82.7          | NH033b       | 22.2                  |           |                       |        | 35.2      |
| 2  | 104.7         | KU10         |                       | 11.2      |                       |        |           |
| 2  | 126.8         | CH02c02a     |                       | 4         |                       | 5.5    | 6         |
| 2  | 130.0         | NH046a       | 5.6                   | 4         |                       |        |           |
| 2  | 131.6         | CH02f06      | 1.6                   | 4         |                       | 1.5    | 3.8       |
| 3  | 10.6          | CH03g12      | 56.1                  | 59.5      | 103                   | 65.7   | 61.3      |
| 3  | 58.2          | NB113a       | 30.3                  | 13.4      | 54.8                  |        |           |
| 3  | 123.0         | CH03e03      |                       |           |                       | 0      | 3.2       |
| 3  | 151.9         | CH03g07      |                       |           |                       | 15.7   | 24.3      |
| 4  | 0.0           | CH02c02b     | 55.3                  | 68        |                       | 62.7   | 73.3      |
| 4  | 20.9          | CN869475     |                       |           |                       |        |           |
| 4  | 40.3          | CH01d03      | 19.6                  | 26        |                       | 24     |           |
| 4  | 51.7          | CTG1064355   | 55.3                  | 68        |                       |        |           |
| 4  | 63.2          | CN900214     |                       |           |                       |        |           |
| 5  | 8.3           | CTG1064855-2 |                       |           |                       |        |           |
| 5  | 118.9         | TsuENH086    |                       |           | 21.5                  |        |           |
| 5  | 139.9         | EMPc106      |                       |           |                       |        |           |
| 5  | 148.2         | CH04g09      | 14.8                  | 32.3      |                       |        |           |
| 5  | 165.5         | Hi09b04      |                       |           |                       | 11.5   |           |
| 6  | 0.8           | CH03d12      | 37.7                  | 35        |                       | 41.8   | 40.2      |
| 6  | 12.1          | U78949x      |                       |           |                       | 55.7   | 66.4      |
| 6  | 41.5          | CTG1063987   |                       |           |                       |        |           |
| 6  | 52.8          | CH01b11      |                       |           |                       |        |           |
| 6  | 96.1          | CTG1070694   |                       |           |                       |        |           |
| 7  | 19.9          | TsuENH006    |                       |           | 69.8                  |        |           |
| 7  | 53.4          | EMPc117      |                       |           |                       |        |           |
| 7  | 58.5          | EMPc111      |                       |           |                       |        |           |
| 8  | 2.0           | CH01h10      |                       |           |                       |        | 51.8      |
| 8  | 64.5          | CH05a02      |                       |           |                       | 28.5   |           |
| 8  | 64.7          | Hi20b03      |                       |           |                       | 27.5   |           |
| 8  | 100.8         | NH036b       | 10.6                  | 0         | 3.5                   |        |           |
| 9  | 3.6           | CO898678     |                       |           |                       |        |           |
| 9  | 12.6          | CH05a03      |                       |           | 38.9                  |        |           |
| 9  | 43.1          | NB106a       | 35.3                  |           |                       |        |           |
| 9  | 60.0          | Hi04a05      |                       |           |                       | 36     | 54.3      |
| 9  | 62.9          | KA20         | 23.5                  |           |                       |        |           |

|    |       |             |      |      |      |      |      |
|----|-------|-------------|------|------|------|------|------|
| 10 | 13.9  | CH02b03b    | 62.9 | 69.2 | 64.3 | 64.2 | 82   |
| 10 | 16.9  | MS06g03     | 62.9 | 76.4 | 85.4 | 74   | 96   |
| 10 | 53.0  | CH03d11     |      |      |      |      |      |
| 10 | 56.2  | BGT24       |      |      |      |      |      |
| 10 | 65.0  | CH02c11     | 41.8 |      |      | 38.1 | 39.9 |
| 10 | 67.4  | NH045a      | 40   | 43.3 | 33   |      |      |
| 10 | 82.8  | CH01f12     | 37.4 | 43.3 |      | 33.2 | 34.4 |
| 10 | 83.0  | CTG1066085- |      |      |      |      |      |
| 10 | 86.5  | AU223670    |      |      |      |      |      |
| 10 | 92.5  | NH039a      | 30   | 24.8 |      |      |      |
| 10 | 142.1 | CH02a08     | 15.6 | 13.9 |      | 24.9 | 23.2 |
| 11 | 3.5   | CH04g07     | 68.7 | 67.3 | 70.6 | 53.4 | 72.7 |
| 11 | 36.8  | IPPN14      |      |      |      |      |      |
| 11 | 67.0  | CH05c02     |      |      | 43.3 |      |      |
| 11 | 72.2  | NH005b      |      |      |      |      |      |
| 11 | 100.6 | CH04h02     | 1.6  | 0    | 0    | 0    | 0    |
| 11 | 111.4 | EMPe11      |      |      |      |      |      |
| 12 | 46.6  | CH01f02     | 44.3 | 36.7 |      | 55.4 | 55.6 |
| 12 | 49.1  | NB104a      |      |      |      |      |      |
| 12 | 52.0  | CH01d09     |      |      |      | 44.7 |      |
| 12 | 102.3 | CH04g04     |      |      |      | 30.2 | 29.3 |
| 12 | 122.9 | CH05d04     | 0    | 5.7  |      | 10.8 | 12.6 |
| 13 | 0.0   | CH02e02     |      |      | 17.7 |      |      |
| 13 | 3.7   | AU223486    |      |      |      |      | 13.9 |
| 13 | 54.9  | CTG1060382  |      |      |      |      |      |
| 13 | 62.6  | CTG1067935  |      |      |      |      |      |
| 13 | 86.0  | NB133a      | 35.5 | 53.6 |      |      |      |
| 14 | 0.2   | NH004a      | 0    | 11.4 | 10   |      |      |
| 14 | 18.8  | CH05g07     | 15.5 | 11.4 |      | 31.5 | 30.9 |
| 14 | 19.5  | EMPe108     |      |      |      |      |      |
| 14 | 69.5  | CH04f06     | 32.3 | 31.2 |      |      |      |
| 14 | 74.1  | NH001c      | 38.9 | 38.8 |      |      |      |
| 14 | 75.5  | CH05g11     | 38.9 | 40.6 |      |      |      |
| 14 | 75.7  | CH04c07     | 42.3 | 40.6 |      |      |      |
| 14 | 93.7  | CH03a03     |      |      |      |      |      |
| 14 | 133.9 | CH05d03     | 45.3 | 46.3 |      |      |      |
| 15 | 22.9  | NH027a      | 0    | 0    |      |      |      |
| 15 | 28.1  | CH02d10b    |      |      |      |      |      |
| 15 | 39.4  | CH03b06     |      |      |      | 10.7 |      |
| 15 | 73.4  | CTG1063001  |      |      |      |      |      |
| 15 | 74.5  | IPPN08      |      |      |      |      |      |
| 15 | 74.6  | CH01d08     | 9.1  | 24.8 |      | 35.1 | 36.7 |
| 15 | 80.0  | NB129a      | 10.3 | 34.9 |      |      |      |
| 15 | 102.5 | EMPe104     |      |      |      |      |      |

|    |       |            |      |      |       |       |       |
|----|-------|------------|------|------|-------|-------|-------|
| 15 | 166.8 | CH02c09    | 68.4 | 77.1 | 118.7 | 104.1 | 110.3 |
| 15 | 170.7 | NB102a     |      |      | 118.7 |       |       |
| 16 | 11.2  | CN910353   |      |      |       |       |       |
| 16 | 16.1  | CH02d10a   |      |      |       | 0     | 0     |
| 16 | 28.1  | AU301431   |      |      |       | 24.8  |       |
| 16 | 51.6  | CTG1062447 |      |      |       |       |       |
| 16 | 115.9 | NB123a     | 52.3 |      |       |       |       |
| 17 | 0.9   | NH014a     | 42   | 62.2 |       |       |       |
| 17 | 35.2  | NH008b     |      |      |       |       |       |
| 17 | 82.7  | CH01h01    | 11   | 26.9 |       | 15    | 24.5  |
| 17 | 95.9  | CH05g03    |      | 20.6 |       | 13.2  | 21.2  |
| 17 | 99.0  | NB110a     | 5.4  | 11.3 |       |       |       |
| 17 | 129.4 | AT000174   |      |      |       |       |       |
| 17 | 131.5 | CH04c06    | 4.2  | 3.8  |       | 2.8   | 0     |

**Supplemental Table S3** List of segregation data of 3,143 SNP markers  
See the supplemental Excel file



**Supplemental Table S4.** List of markers, linkage groups, genetic distances, and physical map location of SNPs and SSRs in pear

| Marker         | Type       | LG       | Map pos.    | Anchoring Scaffold   | Physical position          |
|----------------|------------|----------|-------------|----------------------|----------------------------|
| Pyd01_001      | SNP        | 1        | 0.0         | scaffold87.0         | 317,382                    |
| Pyd01_002      | SNP        | 1        | 7.7         | scaffold947.0        | 126,623                    |
| Pyd01_005      | SNP        | 1        | 12.1        | scaffold205.0        | 164,165                    |
| Pyd01_006      | SNP        | 1        | 13.8        | scaffold231.0        | 540,263                    |
| Pyd01_009      | SNP        | 1        | 18.0        | scaffold112.0        | 427,811                    |
| Pyd01_012      | SNP        | 1        | 21.5        | scaffold87.0         | 431,677                    |
| Pyd01_013      | SNP        | 1        | 23.3        | scaffold18.0         | 1,243,240                  |
| Pyd01_014      | SNP        | 1        | 24.3        | scaffold18.0         | 1,361,613                  |
| Pyd01_016      | SNP        | 1        | 28.4        | scaffold175.0        | 385,513                    |
| Pyd01_018      | SNP        | 1        | 32.0        | scaffold18.0         | 1,433,522                  |
| Pyd01_019      | SNP        | 1        | 32.9        | scaffold58.0         | 1,041,241                  |
| Pyd01_021      | SNP        | 1        | 33.5        | scaffold18.0         | 1,478,301                  |
| Pyd01_023      | SNP        | 1        | 38.0        | scaffold371.0        | 360,967                    |
| Pyd01_024      | SNP        | 1        | 38.0        | scaffold58.0         | 56,306                     |
| Pyd01_031      | SNP        | 1        | 43.6        | scaffold144.0        | 716,041                    |
| Pyd01_034      | SNP        | 1        | 48.1        | scaffold58.0         | 96,189                     |
| Pyd01_035      | SNP        | 1        | 50.7        | scaffold949.0        | 97,040                     |
| Pyd01_038      | SNP        | 1        | 55.1        | scaffold58.0         | 805,699                    |
| Pyd01_042      | SNP        | 1        | 63.4        | scaffold90.0         | 821,578                    |
| Pyd01_043      | SNP        | 1        | 65.2        | scaffold146.0        | 453,439                    |
| Pyd01_046      | SNP        | 1        | 67.6        | scaffold1672.0       | 10,025                     |
| Pyd01_047      | SNP        | 1        | 69.4        | scaffold1193.0       | 361                        |
| Pyd01_049      | SNP        | 1        | 71.5        | scaffold1193.0       | 24,980                     |
| Pyd01_051      | SNP        | 1        | 74.6        | scaffold276.0        | 15,149                     |
| Pyd01_052      | SNP        | 1        | 76.6        | scaffold90.0         | 682,469                    |
| Pyd01_055      | SNP        | 1        | 79.3        | scaffold496.0        | 160,111                    |
| Pyd01_056      | SNP        | 1        | 79.8        | scaffold146.0        | 484,055                    |
| Pyd01_060      | SNP        | 1        | 83.8        | scaffold326.0        | 286,908                    |
| Pyd01_061      | SNP        | 1        | 85.0        | scaffold276.0        | 435,476                    |
| Pyd01_064      | SNP        | 1        | 88.4        | scaffold276.0        | 526,459                    |
| <b>KA4b</b>    | <b>SSR</b> | <b>1</b> | <b>88.6</b> | <b>scaffold16.0</b>  | <b>1,113,866-1,113,585</b> |
| Pyd01_065      | SNP        | 1        | 89.0        | scaffold90.0         | 434,400                    |
| Pyd01_066      | SNP        | 1        | 89.6        | scaffold90.0         | 692,151                    |
| <b>NH010a</b>  | <b>SSR</b> | <b>1</b> | <b>90.8</b> | <b>scaffold280.0</b> | <b>176,365-176,222</b>     |
| Pyd01_067      | SNP        | 1        | 91.1        | scaffold95.0         | 439,232                    |
| Pyd01_068      | SNP        | 1        | 91.2        | scaffold95.0         | 150,973                    |
| Pyd01_069      | SNP        | 1        | 92.0        | scaffold90.0         | 432,488                    |
| <b>CH05g08</b> | <b>SSR</b> | <b>1</b> | <b>92.0</b> | <b>scaffold20.0</b>  | <b>60,528-60,961</b>       |
| Pyd01_070      | SNP        | 1        | 93.4        | scaffold95.0         | 613,396                    |
| Pyd01_071      | SNP        | 1        | 93.6        | scaffold95.0         | 607,956                    |

---

|            |     |   |       |               |           |
|------------|-----|---|-------|---------------|-----------|
| Pyd01_072  | SNP | 1 | 94.2  | scaffold95.0  | 59,920    |
| Pyd01_074  | SNP | 1 | 95.4  | scaffold95.0  | 802,294   |
| Pyd01_078  | SNP | 1 | 99.3  | scaffold37.0  | 658,903   |
| Pyd01_080  | SNP | 1 | 100.6 | scaffold37.0  | 608,763   |
| Pyd01_081  | SNP | 1 | 102.4 | scaffold37.0  | 665,470   |
| Pyd01_084  | SNP | 1 | 107.2 | scaffold95.0  | 79,302    |
| Pyd01_085  | SNP | 1 | 109.1 | scaffold95.0  | 795,943   |
| Pyd01_087  | SNP | 1 | 112.4 | scaffold161.0 | 685,206   |
| Pyd01_089  | SNP | 1 | 113.8 | scaffold161.0 | 383,427   |
| Pyd01_090  | SNP | 1 | 115.0 | scaffold161.0 | 356,409   |
| Pyb02_002  | SNP | 2 | 0.0   | scaffold358.0 | 294,689   |
| Pyb02_005  | SNP | 2 | 5.4   | scaffold358.0 | 386,884   |
| Pyb02_006  | SNP | 2 | 5.4   | scaffold978.0 | 105,801   |
| Pyb02_008  | SNP | 2 | 6.1   | scaffold283.0 | 18,322    |
| Pyb02_009  | SNP | 2 | 6.1   | scaffold283.0 | 3,535     |
| Pyb02_010  | SNP | 2 | 6.2   | scaffold978.0 | 22,326    |
| Pyb02_012  | SNP | 2 | 6.4   | scaffold358.0 | 220,742   |
| Pyb02_014  | SNP | 2 | 6.8   | scaffold358.0 | 326,015   |
| Pyb02_016  | SNP | 2 | 7.3   | scaffold358.0 | 386,916   |
| Pyb02_017  | SNP | 2 | 7.3   | scaffold358.0 | 311,699   |
| Pybd02_004 | SNP | 2 | 8.8   | scaffold672.0 | 8,836     |
| Pyb02_029  | SNP | 2 | 9.3   | scaffold426.0 | 266,895   |
| Pyb02_031  | SNP | 2 | 9.7   | scaffold426.0 | 274,179   |
| Pyb02_033  | SNP | 2 | 10.1  | scaffold614.0 | 55,820    |
| Pyb02_044  | SNP | 2 | 12.9  | scaffold291.0 | 176,421   |
| Pyb02_046  | SNP | 2 | 13.0  | scaffold487.0 | 233,418   |
| Pyb02_048  | SNP | 2 | 13.0  | scaffold305.0 | 167,807   |
| Pyb02_050  | SNP | 2 | 13.1  | scaffold291.0 | 177,344   |
| Pyb02_053  | SNP | 2 | 13.3  | scaffold305.0 | 291,828   |
| Pyb02_058  | SNP | 2 | 13.7  | scaffold292.0 | 433,321   |
| Pyb02_061  | SNP | 2 | 13.9  | scaffold305.0 | 504,677   |
| Pyd02_002  | SNP | 2 | 14.4  | scaffold305.0 | 326,236   |
| Pyb02_066  | SNP | 2 | 16.9  | scaffold48.0  | 128,287   |
| Pyb02_068  | SNP | 2 | 17.0  | scaffold48.0  | 160,253   |
| Pyb02_069  | SNP | 2 | 17.0  | scaffold609.0 | 66,440    |
| Pyd02_006  | SNP | 2 | 17.1  | scaffold808.0 | 163,090   |
| Pyb02_073  | SNP | 2 | 17.4  | scaffold48.0  | 107,372   |
| Pyb02_075  | SNP | 2 | 19.2  | scaffold39.0  | 220,609   |
| Pyb02_077  | SNP | 2 | 20.1  | scaffold39.0  | 784,939   |
| Pyb02_081  | SNP | 2 | 22.0  | scaffold35.0  | 920,969   |
| Pyb02_082  | SNP | 2 | 22.0  | scaffold35.0  | 1,145,136 |
| Pyb02_086  | SNP | 2 | 22.3  | scaffold35.0  | 780,513   |
| Pyb02_087  | SNP | 2 | 22.3  | scaffold39.0  | 1,229,250 |
| Pyb02_088  | SNP | 2 | 22.4  | scaffold196.0 | 130,466   |

---

---

|            |     |   |      |                |           |
|------------|-----|---|------|----------------|-----------|
| Pyb02_090  | SNP | 2 | 22.4 | scaffold35.0   | 821,814   |
| Pyb02_092  | SNP | 2 | 22.4 | scaffold196.0  | 168,810   |
| Pyb02_093  | SNP | 2 | 22.5 | scaffold35.0   | 1,145,184 |
| Pyb02_095  | SNP | 2 | 22.5 | scaffold35.0   | 1,097,420 |
| Pyb02_096  | SNP | 2 | 22.5 | scaffold230.0  | 387,064   |
| Pyb02_097  | SNP | 2 | 22.5 | scaffold230.0  | 550,036   |
| Pyb02_098  | SNP | 2 | 22.6 | scaffold230.0  | 240,384   |
| Pyb02_100  | SNP | 2 | 22.7 | scaffold35.0   | 875,757   |
| Pyb02_101  | SNP | 2 | 22.7 | scaffold35.0   | 1,061,743 |
| Pyb02_102  | SNP | 2 | 22.7 | scaffold39.0   | 1,289,152 |
| Pyb02_103  | SNP | 2 | 22.7 | scaffold39.0   | 1,286,832 |
| Pyb02_104  | SNP | 2 | 22.8 | scaffold39.0   | 1,284,413 |
| Pyb02_105  | SNP | 2 | 22.9 | scaffold35.0   | 1,224,695 |
| Pyb02_106  | SNP | 2 | 22.9 | scaffold35.0   | 1,311,779 |
| Pyb02_107  | SNP | 2 | 22.9 | scaffold35.0   | 593,336   |
| Pyb02_108  | SNP | 2 | 22.9 | scaffold35.0   | 931,690   |
| Pyb02_109  | SNP | 2 | 23.0 | scaffold35.0   | 836,692   |
| Pyb02_112  | SNP | 2 | 23.2 | scaffold39.0   | 921,218   |
| Pyb02_113  | SNP | 2 | 23.3 | scaffold39.0   | 1,082,848 |
| Pyb02_115  | SNP | 2 | 23.3 | scaffold196.0  | 251,310   |
| Pyb02_116  | SNP | 2 | 23.4 | scaffold230.0  | 574,234   |
| Pyb02_119  | SNP | 2 | 24.0 | scaffold35.0   | 943,766   |
| Pyb02_120  | SNP | 2 | 24.1 | scaffold230.0  | 292,290   |
| Pyb02_122  | SNP | 2 | 24.4 | scaffold35.0   | 575,439   |
| Pybd02_007 | SNP | 2 | 41.3 | scaffold1353.0 | 61,025    |
| Pyb02_123  | SNP | 2 | 42.7 | scaffold124.0  | 181,766   |
| Pyb02_124  | SNP | 2 | 43.0 | scaffold39.0   | 997,317   |
| Pyb02_125  | SNP | 2 | 43.1 | scaffold230.0  | 275,272   |
| Pyb02_126  | SNP | 2 | 43.3 | scaffold39.0   | 1,155,308 |
| Pyb02_128  | SNP | 2 | 43.5 | scaffold124.0  | 268,871   |
| Pyb02_130  | SNP | 2 | 46.5 | scaffold196.0  | 28,386    |
| Pyb02_135  | SNP | 2 | 46.9 | scaffold39.0   | 957,389   |
| Pyb02_137  | SNP | 2 | 47.0 | scaffold39.0   | 879,667   |
| Pyb02_138  | SNP | 2 | 47.1 | scaffold39.0   | 955,123   |
| Pyb02_139  | SNP | 2 | 47.2 | scaffold39.0   | 1,107,297 |
| Pyb02_142  | SNP | 2 | 47.9 | scaffold35.0   | 1,317,629 |
| Pyb02_145  | SNP | 2 | 53.4 | scaffold124.0  | 805,726   |
| Pyb02_146  | SNP | 2 | 53.9 | scaffold124.0  | 48,125    |
| Pyb02_147  | SNP | 2 | 54.0 | scaffold124.0  | 96,713    |
| Pyb02_150  | SNP | 2 | 54.6 | scaffold124.0  | 431,484   |
| Pyb02_151  | SNP | 2 | 54.7 | scaffold124.0  | 568,952   |
| Pyb02_154  | SNP | 2 | 54.9 | scaffold35.0   | 297,170   |
| Pyb02_155  | SNP | 2 | 55.0 | scaffold124.0  | 369,203   |
| Pyb02_156  | SNP | 2 | 55.0 | scaffold35.0   | 297,116   |

---

---

|            |     |   |      |                |           |
|------------|-----|---|------|----------------|-----------|
| Pyb02_157  | SNP | 2 | 55.0 | scaffold124.0  | 781,637   |
| Pyb02_160  | SNP | 2 | 55.4 | scaffold35.0   | 299,104   |
| Pyb02_162  | SNP | 2 | 55.4 | scaffold124.0  | 554,331   |
| Pyb02_163  | SNP | 2 | 55.5 | scaffold124.0  | 723,617   |
| Pyb02_164  | SNP | 2 | 55.5 | scaffold124.0  | 805,778   |
| Pyb02_165  | SNP | 2 | 55.5 | scaffold124.0  | 134,395   |
| Pyb02_166  | SNP | 2 | 55.5 | scaffold124.0  | 495,700   |
| Pyd02_012  | SNP | 2 | 55.5 | scaffold101.0  | 911,020   |
| Pyb02_167  | SNP | 2 | 55.6 | scaffold124.0  | 601,466   |
| Pyb02_168  | SNP | 2 | 55.9 | scaffold124.0  | 579,914   |
| Pyb02_170  | SNP | 2 | 56.0 | scaffold124.0  | 174,286   |
| Pyb02_171  | SNP | 2 | 57.7 | scaffold39.0   | 921,263   |
| Pyb02_174  | SNP | 2 | 58.3 | scaffold230.0  | 292,330   |
| Pyb02_175  | SNP | 2 | 58.5 | scaffold196.0  | 293,185   |
| Pyb02_182  | SNP | 2 | 61.7 | scaffold124.0  | 202,738   |
| Pyb02_185  | SNP | 2 | 63.2 | scaffold1148.0 | 42,845    |
| Pyb02_187  | SNP | 2 | 63.3 | scaffold1148.0 | 56,913    |
| Pyb02_188  | SNP | 2 | 63.5 | scaffold247.0  | 489,604   |
| Pyb02_189  | SNP | 2 | 63.5 | scaffold48.0   | 214,999   |
| Pyb02_190  | SNP | 2 | 63.5 | scaffold609.0  | 28,944    |
| Pyb02_191  | SNP | 2 | 63.5 | scaffold609.0  | 84,116    |
| Pyb02_193  | SNP | 2 | 63.6 | scaffold1148.0 | 56,868    |
| Pyb02_194  | SNP | 2 | 64.0 | scaffold609.0  | 131,553   |
| Pyb02_195  | SNP | 2 | 66.7 | scaffold305.0  | 291,801   |
| Pyb02_196  | SNP | 2 | 66.8 | scaffold292.0  | 403,392   |
| Pyd02_016  | SNP | 2 | 67.0 | scaffold101.0  | 444,021   |
| Pyb02_197  | SNP | 2 | 67.5 | scaffold808.0  | 159,228   |
| Pybd02_008 | SNP | 2 | 71.5 | scaffold508.0  | 264,917   |
| Pybd02_009 | SNP | 2 | 73.4 | scaffold4.0    | 1,739,394 |
| Pyb02_203  | SNP | 2 | 74.2 | scaffold447.0  | 6,059     |
| Pybd02_010 | SNP | 2 | 76.3 | scaffold283.0  | 416,246   |
| Pyb02_206  | SNP | 2 | 76.6 | scaffold283.0  | 98,469    |
| Pyb02_207  | SNP | 2 | 76.9 | scaffold508.0  | 326,136   |
| Pyb02_208  | SNP | 2 | 77.0 | scaffold508.0  | 35,005    |
| Pyb02_210  | SNP | 2 | 77.3 | scaffold283.0  | 427,223   |
| Pyb02_211  | SNP | 2 | 77.3 | scaffold508.0  | 335,064   |
| Pyb02_212  | SNP | 2 | 77.4 | scaffold101.0  | 892,655   |
| Pyb02_213  | SNP | 2 | 77.4 | scaffold508.0  | 319,468   |
| Pyb02_215  | SNP | 2 | 78.2 | scaffold101.0  | 736,390   |
| Pyb02_216  | SNP | 2 | 78.2 | scaffold101.0  | 842,245   |
| Pyb02_218  | SNP | 2 | 78.3 | scaffold101.0  | 376,174   |
| Pyb02_219  | SNP | 2 | 78.4 | scaffold101.0  | 838,081   |
| Pyb02_220  | SNP | 2 | 78.7 | scaffold101.0  | 744,745   |
| Pyb02_221  | SNP | 2 | 78.7 | scaffold101.0  | 389,264   |

---

|               |            |          |       |               |                 |
|---------------|------------|----------|-------|---------------|-----------------|
| Pyb02_222     | SNP        | 2        | 78.7  | scaffold101.0 | 326,622         |
| <b>BGT23b</b> | <b>SSR</b> | <b>2</b> | 78.9  | scaffold101.0 | 798,465-798,665 |
| Pyb02_224     | SNP        | 2        | 79.2  | scaffold101.0 | 436,278         |
| Pyb02_225     | SNP        | 2        | 79.4  | scaffold674.0 | 111,289         |
| Pyb02_228     | SNP        | 2        | 80.0  | scaffold4.0   | 1,896,566       |
| Pybd02_011    | SNP        | 2        | 80.1  | scaffold4.0   | 1,489,478       |
| Pyb02_231     | SNP        | 2        | 80.4  | scaffold4.0   | 1,754,109       |
| Pyb02_237     | SNP        | 2        | 81.5  | scaffold4.0   | 1,151,440       |
| Pyb02_238     | SNP        | 2        | 81.7  | scaffold4.0   | 1,004,233       |
| Pyb02_240     | SNP        | 2        | 81.9  | scaffold4.0   | 1,012,599       |
| Pyb02_244     | SNP        | 2        | 82.5  | scaffold4.0   | 796,561         |
| <b>NH033b</b> | <b>SSR</b> | <b>2</b> | 82.7  | scaffold4.0   | 797,447-797,667 |
| Pybd02_013    | SNP        | 2        | 82.8  | scaffold4.0   | 743,475         |
| Pyb02_246     | SNP        | 2        | 84.1  | scaffold4.0   | 1,742,846       |
| Pyb02_248     | SNP        | 2        | 85.9  | scaffold101.0 | 460,775         |
| Pyb02_250     | SNP        | 2        | 86.3  | scaffold101.0 | 437,270         |
| Pyb02_251     | SNP        | 2        | 86.8  | scaffold4.0   | 1,932,024       |
| Pybd02_014    | SNP        | 2        | 89.8  | scaffold4.0   | 1,504,434       |
| Pyb02_259     | SNP        | 2        | 93.2  | scaffold349.0 | 18,528          |
| Pyb02_261     | SNP        | 2        | 93.8  | scaffold4.0   | 575,199         |
| Pyb02_263     | SNP        | 2        | 93.9  | scaffold50.0  | 1,148,821       |
| Pyb02_268     | SNP        | 2        | 94.6  | scaffold50.0  | 997,761         |
| Pyb02_270     | SNP        | 2        | 94.7  | scaffold4.0   | 642,793         |
| Pyb02_272     | SNP        | 2        | 94.8  | scaffold349.0 | 230,293         |
| Pyb02_275     | SNP        | 2        | 94.9  | scaffold4.0   | 575,253         |
| Pyb02_279     | SNP        | 2        | 99.6  | scaffold571.0 | 5,953           |
| Pyb02_284     | SNP        | 2        | 99.9  | scaffold890.0 | 64,671          |
| Pyb02_290     | SNP        | 2        | 100.9 | scaffold357.0 | 268,986         |
| Pyb02_293     | SNP        | 2        | 101.2 | scaffold895.0 | 95,715          |
| Pyb02_294     | SNP        | 2        | 101.2 | scaffold357.0 | 391,491         |
| Pyb02_298     | SNP        | 2        | 102.3 | scaffold357.0 | 269,117         |
| Pyb02_301     | SNP        | 2        | 102.8 | scaffold357.0 | 188,756         |
| Pyb02_302     | SNP        | 2        | 102.9 | scaffold357.0 | 171,045         |
| Pybd02_016    | SNP        | 2        | 103.3 | scaffold458.0 | 366,003         |
| Pyb02_303     | SNP        | 2        | 103.8 | scaffold458.0 | 46,425          |
| Pyb02_304     | SNP        | 2        | 104.0 | scaffold94.0  | 557,961         |
| Pyb02_307     | SNP        | 2        | 104.5 | scaffold183.0 | 132,992         |
| Pyb02_308     | SNP        | 2        | 104.5 | scaffold784.0 | 46,845          |
| <b>KU10</b>   | <b>SSR</b> | <b>2</b> | 104.7 | scaffold183.0 | 295,815-296,064 |
| Pyb02_313     | SNP        | 2        | 104.8 | scaffold183.0 | 570,368         |
| Pyb02_315     | SNP        | 2        | 104.8 | scaffold183.0 | 357,282         |
| Pyb02_316     | SNP        | 2        | 104.8 | scaffold183.0 | 548,427         |
| Pyb02_320     | SNP        | 2        | 104.9 | scaffold183.0 | 614,514         |
| Pyb02_322     | SNP        | 2        | 105.0 | scaffold183.0 | 566,499         |

|                 |            |          |       |               |                 |
|-----------------|------------|----------|-------|---------------|-----------------|
| Pyb02_324       | SNP        | 2        | 105.3 | scaffold784.0 | 26,272          |
| Pyb02_325       | SNP        | 2        | 105.3 | scaffold458.0 | 260,363         |
| Pyb02_326       | SNP        | 2        | 105.5 | scaffold183.0 | 197,547         |
| Pyb02_328       | SNP        | 2        | 105.6 | scaffold784.0 | 119,284         |
| Pyb02_339       | SNP        | 2        | 106.1 | scaffold458.0 | 182,308         |
| Pyb02_340       | SNP        | 2        | 106.1 | scaffold183.0 | 373,229         |
| Pyb02_344       | SNP        | 2        | 106.9 | scaffold94.0  | 691,765         |
| Pyb02_345       | SNP        | 2        | 106.9 | scaffold94.0  | 602,062         |
| Pyd02_024       | SNP        | 2        | 106.9 | scaffold183.0 | 536,163         |
| Pyb02_346       | SNP        | 2        | 107.2 | scaffold94.0  | 610,496         |
| Pyb02_348       | SNP        | 2        | 107.3 | scaffold94.0  | 507,776         |
| Pyb02_349       | SNP        | 2        | 107.4 | scaffold94.0  | 847,810         |
| Pyb02_350       | SNP        | 2        | 107.6 | scaffold94.0  | 661,512         |
| Pyd02_027       | SNP        | 2        | 107.9 | scaffold357.0 | 129,959         |
| Pyb02_353       | SNP        | 2        | 108.4 | scaffold183.0 | 664,935         |
| Pyb02_354       | SNP        | 2        | 108.4 | scaffold183.0 | 602,799         |
| Pyb02_355       | SNP        | 2        | 108.5 | scaffold94.0  | 782,359         |
| Pyb02_359       | SNP        | 2        | 109.0 | scaffold94.0  | 697,847         |
| Pyb02_360       | SNP        | 2        | 109.4 | scaffold94.0  | 646,812         |
| Pybd02_022      | SNP        | 2        | 111.3 | scaffold700.0 | 180,586         |
| Pybd02_023      | SNP        | 2        | 113.7 | scaffold183.0 | 320,495         |
| Pyd02_032       | SNP        | 2        | 115.4 | scaffold50.0  | 991,893         |
| Pyd02_033       | SNP        | 2        | 117.2 | scaffold4.0   | 1,081,430       |
| Pyd02_034       | SNP        | 2        | 117.5 | scaffold4.0   | 1,079,441       |
| Pybd02_025      | SNP        | 2        | 126.6 | scaffold209.0 | 529,373         |
| <b>CH02c02a</b> | <b>SSR</b> | <b>2</b> | 126.8 | scaffold250.0 | 102,711-102,861 |
| Pyb02_374       | SNP        | 2        | 129.1 | scaffold113.0 | 639,031         |
| Pybd02_026      | SNP        | 2        | 129.5 | scaffold453.0 | 127,797         |
| Pyb02_379       | SNP        | 2        | 129.6 | scaffold113.0 | 71,388          |
| Pyb02_381       | SNP        | 2        | 129.7 | scaffold453.0 | 371,054         |
| Pyb02_382       | SNP        | 2        | 129.8 | scaffold453.0 | 82,882          |
| Pyb02_384       | SNP        | 2        | 129.9 | scaffold140.0 | 324,428         |
| <b>NH046a</b>   | <b>SSR</b> | <b>2</b> | 130.0 | scaffold453.0 | 208,104-208,511 |
| Pyb02_387       | SNP        | 2        | 130.2 | scaffold113.0 | 639,041         |
| Pyb02_388       | SNP        | 2        | 130.2 | scaffold113.0 | 650,613         |
| Pyb02_390       | SNP        | 2        | 130.2 | scaffold113.0 | 485,086         |
| Pyb02_391       | SNP        | 2        | 130.3 | scaffold140.0 | 592,015         |
| Pyb02_392       | SNP        | 2        | 130.3 | scaffold140.0 | 19,893          |
| Pyb02_393       | SNP        | 2        | 130.3 | scaffold140.0 | 205,665         |
| Pyb02_395       | SNP        | 2        | 130.3 | scaffold140.0 | 215,462         |
| Pyb02_397       | SNP        | 2        | 130.3 | scaffold627.0 | 14,270          |
| Pyb02_402       | SNP        | 2        | 130.3 | scaffold113.0 | 185,035         |
| Pyb02_403       | SNP        | 2        | 130.4 | scaffold113.0 | 801,487         |
| Pyb02_404       | SNP        | 2        | 130.4 | scaffold140.0 | 182,648         |

|                |            |          |       |                |                 |
|----------------|------------|----------|-------|----------------|-----------------|
| Pyb02_407      | SNP        | 2        | 130.7 | scaffold113.0  | 108,939         |
| Pyb02_413      | SNP        | 2        | 131.0 | scaffold113.0  | 719,483         |
| Pyb02_414      | SNP        | 2        | 131.1 | scaffold140.0  | 683,866         |
| Pyb02_417      | SNP        | 2        | 131.3 | scaffold113.0  | 325,991         |
| Pyb02_419      | SNP        | 2        | 131.3 | scaffold113.0  | 738,736         |
| Pyb02_420      | SNP        | 2        | 131.3 | scaffold113.0  | 781,781         |
| Pyb02_423      | SNP        | 2        | 131.3 | scaffold113.0  | 309,023         |
| Pyb02_426      | SNP        | 2        | 131.3 | scaffold1057.0 | 23,733          |
| Pyb02_427      | SNP        | 2        | 131.3 | scaffold1057.0 | 39,503          |
| Pyb02_428      | SNP        | 2        | 131.3 | scaffold140.0  | 260,309         |
| Pyb02_429      | SNP        | 2        | 131.3 | scaffold113.0  | 325,323         |
| Pyb02_431      | SNP        | 2        | 131.4 | scaffold140.0  | 709,262         |
| Pyb02_433      | SNP        | 2        | 131.4 | scaffold113.0  | 675,882         |
| Pyb02_434      | SNP        | 2        | 131.4 | scaffold113.0  | 568,424         |
| Pyb02_439      | SNP        | 2        | 131.4 | scaffold113.0  | 80,723          |
| Pyb02_440      | SNP        | 2        | 131.5 | scaffold453.0  | 18,191          |
| <b>CH02f06</b> | <b>SSR</b> | <b>2</b> | 131.6 | scaffold113.0  | 553,429-553,587 |
| Pyb02_444      | SNP        | 2        | 131.7 | scaffold113.0  | 553,272         |
| Pyb02_445      | SNP        | 2        | 131.7 | scaffold113.0  | 612,737         |
| Pyb02_446      | SNP        | 2        | 131.7 | scaffold113.0  | 843,275         |
| Pyb02_447      | SNP        | 2        | 131.8 | scaffold140.0  | 169,926         |
| Pyb02_449      | SNP        | 2        | 131.8 | scaffold453.0  | 50,518          |
| Pyb02_451      | SNP        | 2        | 131.9 | scaffold140.0  | 686,068         |
| Pyb02_452      | SNP        | 2        | 132.0 | scaffold140.0  | 745,718         |
| Pyb02_454      | SNP        | 2        | 132.2 | scaffold453.0  | 5,648           |
| Pyb02_456      | SNP        | 2        | 132.2 | scaffold209.0  | 195,921         |
| Pyb02_462      | SNP        | 2        | 132.8 | scaffold140.0  | 345,905         |
| Pyb02_464      | SNP        | 2        | 133.1 | scaffold453.0  | 365,035         |
| Pyb02_472      | SNP        | 2        | 133.9 | scaffold94.0   | 438,830         |
| Pyb02_473      | SNP        | 2        | 134.2 | scaffold94.0   | 270,055         |
| Pyb02_476      | SNP        | 2        | 134.3 | scaffold94.0   | 371,336         |
| Pyd02_047      | SNP        | 2        | 141.3 | scaffold453.0  | 91,346          |
| Pyd02_049      | SNP        | 2        | 141.7 | scaffold94.0   | 376,991         |
| Pyd03_005      | SNP        | 3        | 0.0   | scaffold782.0  | 182,366         |
| Pyd03_006      | SNP        | 3        | 0.0   | scaffold782.0  | 29,966          |
| Pyd03_007      | SNP        | 3        | 0.9   | scaffold198.0  | 304,937         |
| Pyb03_008      | SNP        | 3        | 10.4  | scaffold514.0  | 226,981         |
| <b>CH03g12</b> | <b>SSR</b> | <b>3</b> | 10.6  | scaffold344.0  | 228,663-228,380 |
| Pyb03_009      | SNP        | 3        | 11.5  | scaffold393.0  | 170,109         |
| Pyd03_013      | SNP        | 3        | 14.5  | scaffold198.0  | 644,854         |
| Pyd03_014      | SNP        | 3        | 14.7  | scaffold344.0  | 278,983         |
| Pyb03_017      | SNP        | 3        | 15.3  | scaffold348.0  | 105,014         |
| Pybd03_003     | SNP        | 3        | 16.4  | scaffold198.0  | 552,259         |
| Pyb03_020      | SNP        | 3        | 17.2  | scaffold198.0  | 392,725         |

---

|            |     |   |      |               |         |
|------------|-----|---|------|---------------|---------|
| Pyb03_021  | SNP | 3 | 17.3 | scaffold412.0 | 216,548 |
| Pyb03_022  | SNP | 3 | 17.7 | scaffold198.0 | 80,892  |
| Pyb03_028  | SNP | 3 | 17.9 | scaffold378.0 | 150,944 |
| Pyb03_032  | SNP | 3 | 18.5 | scaffold378.0 | 305,374 |
| Pyb03_036  | SNP | 3 | 18.5 | scaffold378.0 | 41,944  |
| Pyb03_037  | SNP | 3 | 18.6 | scaffold198.0 | 215,442 |
| Pyb03_039  | SNP | 3 | 18.6 | scaffold156.0 | 61,900  |
| Pyb03_041  | SNP | 3 | 18.7 | scaffold432.0 | 30,031  |
| Pyb03_042  | SNP | 3 | 18.7 | scaffold198.0 | 585,601 |
| Pyb03_045  | SNP | 3 | 18.8 | scaffold432.0 | 51,845  |
| Pyb03_047  | SNP | 3 | 18.9 | scaffold514.0 | 294,060 |
| Pyb03_050  | SNP | 3 | 21.6 | scaffold26.0  | 742,804 |
| Pybd03_004 | SNP | 3 | 22.0 | scaffold86.0  | 618,774 |
| Pyb03_053  | SNP | 3 | 22.6 | scaffold393.0 | 411,783 |
| Pyb03_054  | SNP | 3 | 22.7 | scaffold26.0  | 857,126 |
| Pyb03_055  | SNP | 3 | 22.9 | scaffold393.0 | 424,495 |
| Pyb03_056  | SNP | 3 | 22.9 | scaffold393.0 | 312,983 |
| Pyb03_058  | SNP | 3 | 23.1 | scaffold316.0 | 344,462 |
| Pybd03_005 | SNP | 3 | 23.6 | scaffold26.0  | 615,854 |
| Pyb03_061  | SNP | 3 | 24.8 | scaffold62.0  | 660,909 |
| Pyb03_065  | SNP | 3 | 24.8 | scaffold687.0 | 310     |
| Pyb03_074  | SNP | 3 | 30.0 | scaffold86.0  | 5,944   |
| Pyb03_075  | SNP | 3 | 30.0 | scaffold86.0  | 329,678 |
| Pyb03_076  | SNP | 3 | 30.1 | scaffold86.0  | 563,897 |
| Pyb03_078  | SNP | 3 | 30.1 | scaffold86.0  | 676,933 |
| Pyb03_079  | SNP | 3 | 30.2 | scaffold86.0  | 790,188 |
| Pyb03_082  | SNP | 3 | 30.3 | scaffold86.0  | 834,834 |
| Pyb03_083  | SNP | 3 | 30.3 | scaffold938.0 | 100,810 |
| Pybd03_006 | SNP | 3 | 30.6 | scaffold86.0  | 87,627  |
| Pyb03_086  | SNP | 3 | 31.1 | scaffold938.0 | 151,068 |
| Pyb03_088  | SNP | 3 | 31.1 | scaffold938.0 | 119,497 |
| Pyb03_089  | SNP | 3 | 31.1 | scaffold938.0 | 102,106 |
| Pyb03_091  | SNP | 3 | 31.6 | scaffold86.0  | 428,781 |
| Pyb03_093  | SNP | 3 | 33.0 | scaffold302.0 | 367,587 |
| Pyb03_094  | SNP | 3 | 33.9 | scaffold86.0  | 210,226 |
| Pyd03_023  | SNP | 3 | 35.2 | scaffold378.0 | 342,618 |
| Pyd03_024  | SNP | 3 | 35.3 | scaffold378.0 | 167,231 |
| Pyd03_025  | SNP | 3 | 35.3 | scaffold782.0 | 13,911  |
| Pyd03_029  | SNP | 3 | 36.7 | scaffold432.0 | 112,268 |
| Pyd03_030  | SNP | 3 | 39.6 | scaffold62.0  | 643,071 |
| Pyd03_032  | SNP | 3 | 42.8 | scaffold86.0  | 602,105 |
| Pybd03_008 | SNP | 3 | 48.2 | scaffold808.0 | 14,246  |
| Pybd03_009 | SNP | 3 | 49.5 | scaffold302.0 | 169,250 |
| Pybd03_011 | SNP | 3 | 51.6 | scaffold722.0 | 61,067  |

---



|               |            |          |             |                      |                      |
|---------------|------------|----------|-------------|----------------------|----------------------|
| Pyb03_096     | SNP        | 3        | 54.6        | scaffold265.0        | 465,831              |
| Pyb03_097     | SNP        | 3        | 54.7        | scaffold302.0        | 211,253              |
| Pyb03_100     | SNP        | 3        | 54.8        | scaffold265.0        | 107,738              |
| Pyd03_042     | SNP        | 3        | 54.8        | scaffold182.0        | 557,048              |
| Pyb03_102     | SNP        | 3        | 55.1        | scaffold265.0        | 182,372              |
| Pyb03_104     | SNP        | 3        | 55.5        | scaffold257.0        | 121,234              |
| Pyb03_106     | SNP        | 3        | 55.7        | scaffold257.0        | 283,176              |
| Pyb03_108     | SNP        | 3        | 55.8        | scaffold257.0        | 244,596              |
| Pyb03_109     | SNP        | 3        | 56.0        | scaffold455.0        | 288,043              |
| Pyb03_110     | SNP        | 3        | 56.1        | scaffold455.0        | 201,965              |
| Pyb03_111     | SNP        | 3        | 56.2        | scaffold455.0        | 185,712              |
| Pyb03_113     | SNP        | 3        | 56.4        | scaffold257.0        | 7,491                |
| Pyb03_114     | SNP        | 3        | 56.5        | scaffold257.0        | 281,841              |
| Pyb03_115     | SNP        | 3        | 56.8        | scaffold559.0        | 120,267              |
| Pyb03_116     | SNP        | 3        | 57.2        | scaffold659.0        | 81,500               |
| Pyb03_117     | SNP        | 3        | 57.2        | scaffold1128.0       | 7,855                |
| Pyb03_118     | SNP        | 3        | 57.8        | scaffold1128.0       | 57,277               |
| Pyb03_121     | SNP        | 3        | 58.0        | scaffold805.0        | 144,969              |
| Pyb03_124     | SNP        | 3        | 58.1        | scaffold1357.0       | 24,474               |
| Pyb03_125     | SNP        | 3        | 58.1        | scaffold61.0         | 41,972               |
| Pyb03_126     | SNP        | 3        | 58.1        | scaffold456.0        | 343,205              |
| Pyb03_127     | SNP        | 3        | 58.1        | scaffold808.0        | 15,189               |
| <b>NB113a</b> | <b>SSR</b> | <b>3</b> | <b>58.2</b> | <b>scaffold456.0</b> | <b>31,896-32,050</b> |
| Pyb03_130     | SNP        | 3        | 58.2        | scaffold5.0          | 1,846,119            |
| Pyb03_133     | SNP        | 3        | 58.4        | scaffold713.0        | 167,111              |
| Pyb03_143     | SNP        | 3        | 60.1        | scaffold508.0        | 97,196               |
| Pyb03_146     | SNP        | 3        | 60.5        | scaffold438.0        | 351,175              |
| Pyb03_147     | SNP        | 3        | 60.6        | scaffold253.0        | 88,983               |
| Pyb03_148     | SNP        | 3        | 61.0        | scaffold253.0        | 91,595               |
| Pyb03_149     | SNP        | 3        | 61.0        | scaffold438.0        | 374,255              |
| Pyb03_150     | SNP        | 3        | 61.0        | scaffold253.0        | 120,084              |
| Pyb03_157     | SNP        | 3        | 61.9        | scaffold186.0        | 603,849              |
| Pybd03_013    | SNP        | 3        | 62.1        | scaffold808.0        | 47,074               |
| Pyb03_158     | SNP        | 3        | 62.5        | scaffold324.0        | 187,908              |
| Pyb03_159     | SNP        | 3        | 62.6        | scaffold324.0        | 185,792              |
| Pyb03_160     | SNP        | 3        | 62.6        | scaffold324.0        | 251,455              |
| Pyb03_161     | SNP        | 3        | 62.7        | scaffold324.0        | 208,191              |
| Pyb03_162     | SNP        | 3        | 63.0        | scaffold324.0        | 289,981              |
| Pyb03_164     | SNP        | 3        | 68.2        | scaffold456.0        | 133,529              |
| Pyb03_171     | SNP        | 3        | 79.7        | scaffold324.0        | 197,030              |
| Pyb03_172     | SNP        | 3        | 80.1        | scaffold324.0        | 258,301              |
| Pyb03_173     | SNP        | 3        | 80.3        | scaffold324.0        | 197,093              |
| Pyb03_174     | SNP        | 3        | 86.2        | scaffold438.0        | 356,128              |
| Pyb03_176     | SNP        | 3        | 86.9        | scaffold186.0        | 625,050              |

---

|            |     |   |       |                |           |
|------------|-----|---|-------|----------------|-----------|
| Pyb03_178  | SNP | 3 | 87.5  | scaffold324.0  | 326,983   |
| Pyb03_179  | SNP | 3 | 87.9  | scaffold115.0  | 859,705   |
| Pyb03_180  | SNP | 3 | 87.9  | scaffold324.0  | 130,979   |
| Pyb03_181  | SNP | 3 | 87.9  | scaffold186.0  | 588,385   |
| Pybd03_014 | SNP | 3 | 89.4  | scaffold150.0  | 704,131   |
| Pyb03_184  | SNP | 3 | 90.5  | scaffold63.0   | 538,359   |
| Pyb03_187  | SNP | 3 | 91.5  | scaffold123.0  | 488,790   |
| Pyb03_188  | SNP | 3 | 91.6  | scaffold1201.0 | 73,115    |
| Pyb03_189  | SNP | 3 | 91.6  | scaffold123.0  | 490,536   |
| Pyb03_194  | SNP | 3 | 92.2  | scaffold115.0  | 568,974   |
| Pyb03_195  | SNP | 3 | 92.2  | scaffold123.0  | 358,624   |
| Pyb03_196  | SNP | 3 | 92.3  | scaffold123.0  | 613,889   |
| Pyb03_197  | SNP | 3 | 92.5  | scaffold123.0  | 613,828   |
| Pyb03_201  | SNP | 3 | 93.2  | scaffold89.0   | 373,564   |
| Pyb03_203  | SNP | 3 | 93.3  | scaffold89.0   | 556,375   |
| Pybd03_015 | SNP | 3 | 93.4  | scaffold428.0  | 250,320   |
| Pyb03_207  | SNP | 3 | 93.5  | scaffold52.0   | 510,224   |
| Pyb03_208  | SNP | 3 | 93.5  | scaffold123.0  | 227,389   |
| Pyb03_209  | SNP | 3 | 93.5  | scaffold428.0  | 313,749   |
| Pyb03_213  | SNP | 3 | 93.9  | scaffold89.0   | 475,262   |
| Pyb03_220  | SNP | 3 | 94.4  | scaffold150.0  | 556,602   |
| Pyb03_225  | SNP | 3 | 96.1  | scaffold287.0  | 287,795   |
| Pyb03_226  | SNP | 3 | 97.0  | scaffold485.0  | 183,105   |
| Pyb03_233  | SNP | 3 | 105.3 | scaffold216.0  | 399,637   |
| Pyb03_234  | SNP | 3 | 105.5 | scaffold89.0   | 506,628   |
| Pyb03_235  | SNP | 3 | 105.5 | scaffold89.0   | 556,409   |
| Pybd03_017 | SNP | 3 | 109.3 | scaffold428.0  | 247,948   |
| Pybd03_018 | SNP | 3 | 111.3 | scaffold89.0   | 366,640   |
| Pyb03_236  | SNP | 3 | 113.6 | scaffold115.0  | 509,992   |
| Pyb03_237  | SNP | 3 | 113.6 | scaffold123.0  | 625,152   |
| Pyb03_239  | SNP | 3 | 113.7 | scaffold123.0  | 700,931   |
| Pyb03_240  | SNP | 3 | 113.7 | scaffold123.0  | 448,674   |
| Pyb03_241  | SNP | 3 | 113.7 | scaffold123.0  | 495,606   |
| Pyb03_242  | SNP | 3 | 115.7 | scaffold1216.0 | 20,774    |
| Pyb03_244  | SNP | 3 | 116.3 | scaffold150.0  | 725,671   |
| Pyb03_245  | SNP | 3 | 116.3 | scaffold1216.0 | 22,431    |
| Pyb03_250  | SNP | 3 | 119.9 | scaffold353.0  | 345,559   |
| Pyb03_251  | SNP | 3 | 120.1 | scaffold353.0  | 264,493   |
| Pyb03_254  | SNP | 3 | 121.0 | scaffold10.0   | 292,128   |
| Pyb03_256  | SNP | 3 | 121.1 | scaffold10.0   | 253,797   |
| Pyb03_258  | SNP | 3 | 121.7 | scaffold10.0   | 497,954   |
| Pyb03_263  | SNP | 3 | 122.4 | scaffold10.0   | 1,729,200 |
| Pyb03_264  | SNP | 3 | 122.4 | scaffold10.0   | 976,061   |
| Pyb03_265  | SNP | 3 | 122.6 | scaffold10.0   | 1,290,177 |

---

|                |            |          |              |                |                     |
|----------------|------------|----------|--------------|----------------|---------------------|
| Pyb03_268      | SNP        | 3        | 122.7        | scaffold10.0   | 1,199,864           |
| Pyb03_269      | SNP        | 3        | 122.8        | scaffold10.0   | 547,670             |
| Pyb03_270      | SNP        | 3        | 122.8        | scaffold10.0   | 1,625,773           |
| Pyb03_271      | SNP        | 3        | 122.8        | scaffold10.0   | 1,297,847           |
| Pyb03_272      | SNP        | 3        | 122.8        | scaffold10.0   | 1,450,015           |
| Pyb03_273      | SNP        | 3        | 122.8        | scaffold10.0   | 1,207,393           |
| Pyb03_274      | SNP        | 3        | 122.8        | scaffold10.0   | 1,037,583           |
| Pyb03_276      | SNP        | 3        | 122.8        | scaffold10.0   | 1,098,690           |
| Pyb03_277      | SNP        | 3        | 122.8        | scaffold10.0   | 1,024,624           |
| Pyb03_278      | SNP        | 3        | 122.8        | scaffold10.0   | 1,058,352           |
| Pyb03_279      | SNP        | 3        | 122.8        | scaffold10.0   | 1,604,358           |
| Pyb03_280      | SNP        | 3        | 122.9        | scaffold10.0   | 1,457,914           |
| <b>CH03e03</b> | <b>SSR</b> | <b>3</b> | <b>123.0</b> | scaffold10.0   | 1,166,953-1,167,159 |
| Pyb03_281      | SNP        | 3        | 123.1        | scaffold10.0   | 1,403,090           |
| Pybd03_019     | SNP        | 3        | 124.4        | scaffold89.0   | 422,201             |
| Pyb03_284      | SNP        | 3        | 124.5        | scaffold98.0   | 89,837              |
| Pyb03_288      | SNP        | 3        | 125.2        | scaffold10.0   | 1,181,914           |
| Pyd03_052      | SNP        | 3        | 126.3        | scaffold123.0  | 155,347             |
| Pyd03_053      | SNP        | 3        | 126.4        | scaffold123.0  | 65,097              |
| Pyb03_290      | SNP        | 3        | 128.5        | scaffold2.0    | 2,181,940           |
| Pyb03_294      | SNP        | 3        | 133.3        | scaffold2.0    | 2,180,491           |
| Pyb03_295      | SNP        | 3        | 133.5        | scaffold353.0  | 233,967             |
| Pyd03_058      | SNP        | 3        | 138.5        | scaffold63.0   | 690,186             |
| Pyb03_298      | SNP        | 3        | 140.4        | scaffold2.0    | 2,252,653           |
| Pyd03_064      | SNP        | 3        | 145.3        | scaffold98.0   | 268,970             |
| Pyb03_300      | SNP        | 3        | 145.5        | scaffold2.0    | 1,930,867           |
| Pyb03_312      | SNP        | 3        | 147.0        | scaffold1125.0 | 23,289              |
| Pyb03_314      | SNP        | 3        | 147.0        | scaffold2.0    | 1,920,682           |
| Pyb03_320      | SNP        | 3        | 147.3        | scaffold2.0    | 2,038,805           |
| Pyb03_324      | SNP        | 3        | 147.4        | scaffold2.0    | 2,223,125           |
| Pyb03_327      | SNP        | 3        | 147.4        | scaffold353.0  | 360,288             |
| Pyb03_329      | SNP        | 3        | 147.5        | scaffold2.0    | 2,254,182           |
| Pybd03_020     | SNP        | 3        | 148.8        | scaffold98.0   | 370,550             |
| Pyb03_336      | SNP        | 3        | 149.2        | scaffold63.0   | 504,452             |
| Pyb03_339      | SNP        | 3        | 149.2        | scaffold63.0   | 106,503             |
| Pyb03_340      | SNP        | 3        | 149.3        | scaffold957.0  | 100,835             |
| Pyb03_344      | SNP        | 3        | 149.4        | scaffold485.0  | 187,548             |
| Pyb03_345      | SNP        | 3        | 149.5        | scaffold98.0   | 186,581             |
| Pyb03_346      | SNP        | 3        | 149.6        | scaffold98.0   | 351,373             |
| Pyb03_351      | SNP        | 3        | 149.7        | scaffold118.0  | 268,149             |
| Pyb03_353      | SNP        | 3        | 149.7        | scaffold2.0    | 1,144,090           |
| Pyb03_354      | SNP        | 3        | 149.7        | scaffold118.0  | 618,488             |
| Pyb03_355      | SNP        | 3        | 149.7        | scaffold2.0    | 1,574,990           |
| Pyb03_356      | SNP        | 3        | 149.7        | scaffold974.0  | 35,925              |

|                |            |          |       |               |               |
|----------------|------------|----------|-------|---------------|---------------|
| Pyb03_357      | SNP        | 3        | 149.8 | scaffold63.0  | 714,390       |
| Pyb03_358      | SNP        | 3        | 149.8 | scaffold598.0 | 187,741       |
| Pyb03_359      | SNP        | 3        | 149.8 | scaffold118.0 | 180,960       |
| Pyb03_360      | SNP        | 3        | 149.8 | scaffold2.0   | 1,523,162     |
| Pyb03_361      | SNP        | 3        | 149.8 | scaffold98.0  | 203,726       |
| Pyb03_362      | SNP        | 3        | 149.8 | scaffold2.0   | 1,187,064     |
| Pyb03_363      | SNP        | 3        | 149.8 | scaffold2.0   | 1,633,911     |
| Pyb03_364      | SNP        | 3        | 149.8 | scaffold118.0 | 182,205       |
| Pyb03_365      | SNP        | 3        | 149.8 | scaffold2.0   | 1,539,458     |
| Pyb03_366      | SNP        | 3        | 149.8 | scaffold118.0 | 115,948       |
| Pyb03_372      | SNP        | 3        | 149.9 | scaffold98.0  | 167,300       |
| Pyb03_373      | SNP        | 3        | 149.9 | scaffold63.0  | 1,100,664     |
| Pyb03_375      | SNP        | 3        | 149.9 | scaffold98.0  | 350,357       |
| Pyb03_376      | SNP        | 3        | 149.9 | scaffold63.0  | 1,131,956     |
| Pyb03_377      | SNP        | 3        | 149.9 | scaffold63.0  | 795,689       |
| Pyb03_378      | SNP        | 3        | 149.9 | scaffold63.0  | 993,758       |
| Pyb03_382      | SNP        | 3        | 150.2 | scaffold118.0 | 317,261       |
| Pyb03_383      | SNP        | 3        | 150.2 | scaffold118.0 | 287,302       |
| Pyb03_384      | SNP        | 3        | 150.2 | scaffold118.0 | 374,209       |
| Pyb03_385      | SNP        | 3        | 150.2 | scaffold63.0  | 989,721       |
| Pyb03_386      | SNP        | 3        | 150.2 | scaffold2.0   | 1,593,186     |
| Pyb03_387      | SNP        | 3        | 150.2 | scaffold98.0  | 4,605         |
| Pyb03_388      | SNP        | 3        | 150.2 | scaffold98.0  | 506,056       |
| Pyb03_389      | SNP        | 3        | 150.2 | scaffold98.0  | 411,218       |
| Pyb03_391      | SNP        | 3        | 150.2 | scaffold98.0  | 278,599       |
| Pyb03_392      | SNP        | 3        | 150.2 | scaffold63.0  | 714,307       |
| Pyb03_393      | SNP        | 3        | 150.3 | scaffold2.0   | 1,580,498     |
| Pyb03_396      | SNP        | 3        | 150.3 | scaffold63.0  | 1,027,982     |
| Pyb03_397      | SNP        | 3        | 150.6 | scaffold98.0  | 217,493       |
| Pyb03_400      | SNP        | 3        | 150.7 | scaffold2.0   | 1,093,014     |
| Pyb03_401      | SNP        | 3        | 150.8 | scaffold974.0 | 84,336        |
| Pyb03_402      | SNP        | 3        | 150.8 | scaffold2.0   | 1,084,799     |
| Pyb03_403      | SNP        | 3        | 151.0 | scaffold63.0  | 1,100,632     |
| Pyb03_404      | SNP        | 3        | 151.0 | scaffold2.0   | 1,175,922     |
| Pyb03_405      | SNP        | 3        | 151.1 | scaffold118.0 | 476,634       |
| Pyb03_410      | SNP        | 3        | 151.7 | scaffold974.0 | 76,965        |
| <b>CH03g07</b> | <b>SSR</b> | <b>3</b> | 151.9 | scaffold98.0  | 54,469-54,693 |
| Pybd03_022     | SNP        | 3        | 152.5 | scaffold118.0 | 360,446       |
| Pyb03_415      | SNP        | 3        | 153.6 | scaffold150.0 | 351,887       |
| Pybd03_023     | SNP        | 3        | 153.8 | scaffold98.0  | 24,350        |
| Pyb03_417      | SNP        | 3        | 154.4 | scaffold150.0 | 681,424       |
| Pyd03_071      | SNP        | 3        | 157.8 | scaffold98.0  | 304,762       |
| Pyd03_072      | SNP        | 3        | 157.8 | scaffold98.0  | 342,933       |
| Pyd03_073      | SNP        | 3        | 157.8 | scaffold98.0  | 307,123       |

|                 |            |          |      |                |                 |
|-----------------|------------|----------|------|----------------|-----------------|
| <b>CH02c02b</b> | <b>SSR</b> | <b>4</b> | 0.0  | scaffold724.0  | 58,048-58,158   |
| Pyb04_004       | SNP        | 4        | 1.3  | scaffold475.0  | 285,885         |
| Pyb04_005       | SNP        | 4        | 1.8  | scaffold475.0  | 174,134         |
| Pyb04_006       | SNP        | 4        | 2.0  | scaffold475.0  | 253,491         |
| Pyb04_007       | SNP        | 4        | 2.5  | scaffold475.0  | 344,896         |
| Pyb04_011       | SNP        | 4        | 3.3  | scaffold475.0  | 160,744         |
| Pyb04_012       | SNP        | 4        | 3.4  | scaffold94.0   | 133,588         |
| Pyb04_013       | SNP        | 4        | 4.0  | scaffold724.0  | 183,796         |
| Pyb04_014       | SNP        | 4        | 4.2  | scaffold222.0  | 578,700         |
| Pyb04_016       | SNP        | 4        | 4.8  | scaffold1725.0 | 2,336           |
| Pyb04_017       | SNP        | 4        | 5.3  | scaffold222.0  | 607,921         |
| Pyb04_026       | SNP        | 4        | 9.6  | scaffold300.0  | 182,303         |
| Pyb04_027       | SNP        | 4        | 10.1 | scaffold134.1  | 125,376         |
| Pyb04_029       | SNP        | 4        | 11.0 | scaffold300.0  | 213,066         |
| Pyb04_034       | SNP        | 4        | 12.5 | scaffold300.0  | 78,099          |
| Pyb04_037       | SNP        | 4        | 14.2 | scaffold483.0  | 257,154         |
| Pyb04_038       | SNP        | 4        | 14.9 | scaffold483.0  | 55,736          |
| Pyb04_039       | SNP        | 4        | 15.1 | scaffold483.0  | 155,872         |
| Pyb04_041       | SNP        | 4        | 15.9 | scaffold483.0  | 84,448          |
| Pyb04_042       | SNP        | 4        | 17.1 | scaffold135.0  | 740,140         |
| Pyb04_043       | SNP        | 4        | 17.5 | scaffold135.0  | 380,161         |
| Pyb04_044       | SNP        | 4        | 17.8 | scaffold200.0  | 111,698         |
| Pyb04_045       | SNP        | 4        | 18.0 | scaffold462.0  | 266,966         |
| Pyb04_046       | SNP        | 4        | 18.1 | scaffold135.0  | 368,047         |
| Pyb04_047       | SNP        | 4        | 18.4 | scaffold135.0  | 430,190         |
| Pyb04_048       | SNP        | 4        | 18.8 | scaffold135.0  | 453,315         |
| Pyb04_049       | SNP        | 4        | 19.1 | scaffold135.0  | 296,863         |
| Pyb04_051       | SNP        | 4        | 19.6 | scaffold200.0  | 53,330          |
| Pyb04_052       | SNP        | 4        | 19.6 | scaffold135.0  | 453,279         |
| Pyb04_053       | SNP        | 4        | 19.8 | scaffold200.0  | 294,380         |
| Pyb04_054       | SNP        | 4        | 20.1 | scaffold462.0  | 258,427         |
| Pyb04_055       | SNP        | 4        | 20.7 | scaffold462.0  | 320,002         |
| <b>CN869475</b> | <b>SSR</b> | <b>4</b> | 20.9 | scaffold191.0  | 178,433-178,606 |
| Pyb04_056       | SNP        | 4        | 21.1 | scaffold295.0  | 179,853         |
| Pyb04_057       | SNP        | 4        | 21.3 | scaffold295.0  | 195,881         |
| Pyb04_061       | SNP        | 4        | 22.7 | scaffold322.0  | 241,553         |
| Pyb04_062       | SNP        | 4        | 22.8 | scaffold191.0  | 342,853         |
| Pyb04_063       | SNP        | 4        | 23.4 | scaffold191.0  | 55,265          |
| Pyb04_064       | SNP        | 4        | 24.0 | scaffold322.0  | 252,126         |
| Pyb04_066       | SNP        | 4        | 25.8 | scaffold499.0  | 242,340         |
| Pyb04_067       | SNP        | 4        | 26.3 | scaffold913.0  | 81,198          |
| Pyb04_068       | SNP        | 4        | 26.4 | scaffold342.0  | 402,859         |
| Pyb04_070       | SNP        | 4        | 26.6 | scaffold832.0  | 129,495         |
| Pyb04_077       | SNP        | 4        | 28.7 | scaffold311.0  | 305,536         |

|                   |            |          |             |                |                 |
|-------------------|------------|----------|-------------|----------------|-----------------|
| Pyb04_078         | SNP        | 4        | 28.9        | scaffold311.0  | 407,326         |
| Pyb04_080         | SNP        | 4        | 29.6        | scaffold311.0  | 134,125         |
| Pyb04_082         | SNP        | 4        | 30.9        | scaffold65.0   | 453,524         |
| Pyb04_083         | SNP        | 4        | 31.1        | scaffold65.0   | 484,435         |
| Pyb04_085         | SNP        | 4        | 31.5        | scaffold65.0   | 432,198         |
| Pyb04_086         | SNP        | 4        | 31.9        | scaffold315.0  | 122,705         |
| Pyb04_087         | SNP        | 4        | 32.3        | scaffold315.0  | 194,791         |
| Pyb04_088         | SNP        | 4        | 32.7        | scaffold65.0   | 239,925         |
| Pyb04_089         | SNP        | 4        | 33.1        | scaffold65.0   | 212,912         |
| Pyb04_091         | SNP        | 4        | 34.4        | scaffold1165.0 | 76,857          |
| Pyb04_093         | SNP        | 4        | 36.7        | scaffold534.0  | 228,825         |
| Pyb04_094         | SNP        | 4        | 37.3        | scaffold28.0   | 654,108         |
| Pyb04_096         | SNP        | 4        | 37.9        | scaffold290.0  | 157,630         |
| Pyb04_098         | SNP        | 4        | 38.3        | scaffold290.0  | 173,707         |
| Pyb04_101         | SNP        | 4        | 38.9        | scaffold1030.0 | 126,642         |
| Pyb04_102         | SNP        | 4        | 39.1        | scaffold1561.0 | 913             |
| Pyb04_106         | SNP        | 4        | 39.7        | scaffold207.0  | 189,653         |
| <b>CH01d03</b>    | <b>SSR</b> | <b>4</b> | <b>40.3</b> | scaffold96.0   | 551,862-552,008 |
| Pyb04_112         | SNP        | 4        | 40.3        | scaffold290.0  | 132,076         |
| Pyb04_114         | SNP        | 4        | 40.9        | scaffold1025.0 | 90,606          |
| Pyb04_115         | SNP        | 4        | 41.2        | scaffold1561.0 | 900             |
| Pyb04_116         | SNP        | 4        | 41.6        | scaffold534.0  | 228,885         |
| Pyb04_117         | SNP        | 4        | 41.8        | scaffold534.0  | 102,657         |
| Pyb04_118         | SNP        | 4        | 42.1        | scaffold534.0  | 137,660         |
| Pyb04_119         | SNP        | 4        | 42.3        | scaffold290.0  | 272,579         |
| Pyb04_120         | SNP        | 4        | 42.8        | scaffold96.0   | 371,361         |
| Pyb04_121         | SNP        | 4        | 42.9        | scaffold96.0   | 303,150         |
| Pyb04_122         | SNP        | 4        | 43.2        | scaffold96.0   | 303,284         |
| Pyb04_125         | SNP        | 4        | 43.9        | scaffold96.0   | 329,385         |
| Pyb04_126         | SNP        | 4        | 44.3        | scaffold234.0  | 104,191         |
| Pyb04_127         | SNP        | 4        | 44.6        | scaffold234.0  | 256,475         |
| Pyb04_128         | SNP        | 4        | 44.8        | scaffold234.0  | 484,746         |
| Pyb04_129         | SNP        | 4        | 44.8        | scaffold234.0  | 229,710         |
| Pyb04_130         | SNP        | 4        | 45.1        | scaffold234.0  | 9,712           |
| Pyb04_131         | SNP        | 4        | 45.4        | scaffold96.0   | 553,438         |
| Pyb04_132         | SNP        | 4        | 45.7        | scaffold234.0  | 101,045         |
| Pyb04_133         | SNP        | 4        | 45.9        | scaffold234.0  | 517,115         |
| Pyb04_134         | SNP        | 4        | 46.0        | scaffold234.0  | 391,504         |
| Pyb04_135         | SNP        | 4        | 46.5        | scaffold234.0  | 316,675         |
| Pyb04_136         | SNP        | 4        | 47.2        | scaffold234.0  | 101,461         |
| Pyb04_138         | SNP        | 4        | 48.5        | scaffold96.0   | 265,604         |
| Pyb04_140         | SNP        | 4        | 51.2        | scaffold387.0  | 152,770         |
| <b>CTG1064355</b> | <b>SSR</b> | <b>4</b> | <b>51.7</b> | scaffold7.0    | 777,042-777,250 |
| Pyb04_142         | SNP        | 4        | 52.0        | scaffold325.0  | 206,690         |

|                     |            |          |             |               |                 |
|---------------------|------------|----------|-------------|---------------|-----------------|
| Pyb04_147           | SNP        | 4        | 52.9        | scaffold370.0 | 331,187         |
| Pyb04_148           | SNP        | 4        | 53.1        | scaffold370.0 | 442,593         |
| Pyb04_153           | SNP        | 4        | 54.2        | scaffold370.0 | 161,778         |
| Pyb04_163           | SNP        | 4        | 59.8        | scaffold545.0 | 151,140         |
| Pyb04_165           | SNP        | 4        | 60.2        | scaffold545.0 | 21,018          |
| <b>CN900214</b>     | <b>SSR</b> | <b>4</b> | <b>63.2</b> | scaffold54.2  | 387,613-387,889 |
| Pyb04_171           | SNP        | 4        | 63.4        | scaffold244.0 | 156,589         |
| Pyb04_172           | SNP        | 4        | 63.6        | scaffold244.0 | 385,830         |
| Pyb04_174           | SNP        | 4        | 63.9        | scaffold244.0 | 201,896         |
| Pyb04_175           | SNP        | 4        | 64.0        | scaffold244.0 | 56,623          |
| Pyb04_176           | SNP        | 4        | 64.2        | scaffold244.0 | 413,906         |
| Pyb04_177           | SNP        | 4        | 64.4        | scaffold244.0 | 458,470         |
| Pyb04_179           | SNP        | 4        | 65.0        | scaffold54.2  | 416,218         |
| Pyb04_182           | SNP        | 4        | 65.7        | scaffold54.2  | 370,900         |
| Pyb04_184           | SNP        | 4        | 66.4        | scaffold297.0 | 165,553         |
| Pyb04_185           | SNP        | 4        | 66.7        | scaffold297.0 | 244,039         |
| Pyb04_187           | SNP        | 4        | 67.4        | scaffold297.0 | 61,776          |
| Pyb04_190           | SNP        | 4        | 70.3        | scaffold297.0 | 158,511         |
| Pyb05_004           | SNP        | 5        | 0.0         | scaffold299.0 | 414,509         |
| Pyb05_010           | SNP        | 5        | 1.2         | scaffold139.0 | 209,450         |
| Pyb05_014           | SNP        | 5        | 5.3         | scaffold539.0 | 202,802         |
| Pyb05_018           | SNP        | 5        | 6.2         | scaffold409.0 | 84,043          |
| Pyb05_019           | SNP        | 5        | 6.3         | scaffold523.0 | 216,470         |
| Pyb05_024           | SNP        | 5        | 6.4         | scaffold409.0 | 365,487         |
| Pyb05_027           | SNP        | 5        | 7.2         | scaffold171.0 | 402,504         |
| Pyb05_028           | SNP        | 5        | 7.7         | scaffold147.0 | 305,391         |
| Pybd05_001          | SNP        | 5        | 8.0         | scaffold171.0 | 207,965         |
| Pyb05_032           | SNP        | 5        | 8.1         | scaffold147.0 | 218,350         |
| Pyb05_033           | SNP        | 5        | 8.1         | scaffold147.0 | 693,033         |
| Pyb05_034           | SNP        | 5        | 8.1         | scaffold147.0 | 725,588         |
| <b>CTG1064855-2</b> | <b>SSR</b> | <b>5</b> | <b>8.3</b>  | scaffold147.0 | 657,406-657,670 |
| Pyb05_040           | SNP        | 5        | 8.3         | scaffold147.0 | 362,712         |
| Pyb05_041           | SNP        | 5        | 8.4         | scaffold317.0 | 244,444         |
| Pyb05_042           | SNP        | 5        | 8.4         | scaffold147.0 | 207,982         |
| Pyb05_043           | SNP        | 5        | 8.4         | scaffold171.0 | 11,513          |
| Pyb05_044           | SNP        | 5        | 8.4         | scaffold166.0 | 179,122         |
| Pyb05_045           | SNP        | 5        | 8.4         | scaffold147.0 | 50,028          |
| Pyb05_046           | SNP        | 5        | 8.4         | scaffold171.0 | 121,050         |
| Pyb05_047           | SNP        | 5        | 8.4         | scaffold147.0 | 482,809         |
| Pyb05_048           | SNP        | 5        | 8.4         | scaffold147.0 | 471,103         |
| Pyb05_049           | SNP        | 5        | 8.4         | scaffold147.0 | 634,263         |
| Pyb05_051           | SNP        | 5        | 8.4         | scaffold166.0 | 281,137         |
| Pyb05_052           | SNP        | 5        | 8.4         | scaffold166.0 | 128,518         |
| Pyb05_053           | SNP        | 5        | 8.4         | scaffold147.0 | 487,517         |

---

|            |     |   |      |                |           |
|------------|-----|---|------|----------------|-----------|
| Pyb05_061  | SNP | 5 | 9.0  | scaffold147.0  | 58,747    |
| Pyb05_062  | SNP | 5 | 9.0  | scaffold147.0  | 487,483   |
| Pyb05_064  | SNP | 5 | 9.3  | scaffold171.0  | 450,287   |
| Pyb05_065  | SNP | 5 | 9.5  | scaffold166.0  | 177,840   |
| Pyb05_066  | SNP | 5 | 9.5  | scaffold147.0  | 776,617   |
| Pyb05_067  | SNP | 5 | 9.6  | scaffold171.0  | 176,562   |
| Pyd05_002  | SNP | 5 | 9.9  | scaffold523.0  | 70,720    |
| Pyd05_003  | SNP | 5 | 10.5 | scaffold147.0  | 212,930   |
| Pyd05_008  | SNP | 5 | 11.5 | scaffold171.0  | 123,191   |
| Pyb05_070  | SNP | 5 | 14.1 | scaffold733.0  | 133,782   |
| Pyb05_071  | SNP | 5 | 14.7 | scaffold139.0  | 236,507   |
| Pyb05_072  | SNP | 5 | 14.7 | scaffold139.0  | 644,259   |
| Pyb05_075  | SNP | 5 | 15.4 | scaffold356.0  | 160,801   |
| Pyb05_078  | SNP | 5 | 16.2 | scaffold356.0  | 264,301   |
| Pyd05_013  | SNP | 5 | 16.6 | scaffold65.0   | 1,056,035 |
| Pyd05_014  | SNP | 5 | 16.7 | scaffold65.0   | 1,083,005 |
| Pyb05_084  | SNP | 5 | 18.2 | scaffold388.0  | 53,353    |
| Pyb05_090  | SNP | 5 | 18.4 | scaffold807.0  | 124,554   |
| Pyb05_092  | SNP | 5 | 18.5 | scaffold243.0  | 504,276   |
| Pyb05_101  | SNP | 5 | 27.2 | scaffold925.0  | 7,164     |
| Pyb05_102  | SNP | 5 | 27.2 | scaffold45.0   | 1,077,013 |
| Pyb05_103  | SNP | 5 | 28.0 | scaffold45.0   | 794,874   |
| Pybd05_007 | SNP | 5 | 29.9 | scaffold45.0   | 1,089,733 |
| Pyb05_104  | SNP | 5 | 32.9 | scaffold643.0  | 146,752   |
| Pyb05_105  | SNP | 5 | 33.1 | scaffold65.0   | 1,072,107 |
| Pyb05_106  | SNP | 5 | 33.3 | scaffold643.0  | 113,659   |
| Pyb05_110  | SNP | 5 | 33.9 | scaffold966.0  | 32,317    |
| Pyb05_112  | SNP | 5 | 35.2 | scaffold925.0  | 16,542    |
| Pyb05_113  | SNP | 5 | 37.5 | scaffold312.1  | 37,807    |
| Pyb05_115  | SNP | 5 | 38.0 | scaffold69.0   | 204,205   |
| Pyd05_024  | SNP | 5 | 42.2 | scaffold1538.0 | 5,866     |
| Pyd05_025  | SNP | 5 | 44.2 | scaffold229.0  | 569,145   |
| Pyd05_029  | SNP | 5 | 46.7 | scaffold671.0  | 165,974   |
| Pyd05_031  | SNP | 5 | 47.2 | scaffold299.0  | 299,694   |
| Pyd05_034  | SNP | 5 | 50.8 | scaffold139.0  | 13,350    |
| Pyb05_119  | SNP | 5 | 53.9 | scaffold6.0    | 486,786   |
| Pyb05_121  | SNP | 5 | 55.0 | scaffold6.0    | 502,336   |
| Pyb05_124  | SNP | 5 | 55.7 | scaffold6.0    | 1,286,204 |
| Pyb05_125  | SNP | 5 | 55.9 | scaffold6.0    | 1,375,241 |
| Pyb05_126  | SNP | 5 | 55.9 | scaffold6.0    | 638,384   |
| Pyb05_128  | SNP | 5 | 55.9 | scaffold6.0    | 1,073,189 |
| Pyb05_129  | SNP | 5 | 55.9 | scaffold6.0    | 865,153   |
| Pyb05_130  | SNP | 5 | 55.9 | scaffold6.0    | 1,211,288 |
| Pyb05_131  | SNP | 5 | 56.0 | scaffold6.0    | 1,448,044 |

---



---

|           |     |   |      |                |           |
|-----------|-----|---|------|----------------|-----------|
| Pyb05_132 | SNP | 5 | 56.0 | scaffold6.0    | 497,403   |
| Pyb05_135 | SNP | 5 | 56.1 | scaffold1173.0 | 97,037    |
| Pyb05_137 | SNP | 5 | 56.2 | scaffold1080.0 | 72,058    |
| Pyb05_138 | SNP | 5 | 56.2 | scaffold1080.0 | 72,114    |
| Pyb05_139 | SNP | 5 | 56.3 | scaffold6.0    | 1,280,767 |
| Pyb05_140 | SNP | 5 | 56.4 | scaffold6.0    | 582,414   |
| Pyb05_141 | SNP | 5 | 56.5 | scaffold69.0   | 1,052,284 |
| Pyb05_142 | SNP | 5 | 59.2 | scaffold69.0   | 764,696   |
| Pyb05_143 | SNP | 5 | 60.2 | scaffold69.0   | 482,483   |
| Pyb05_144 | SNP | 5 | 60.3 | scaffold69.0   | 576,144   |
| Pyb05_146 | SNP | 5 | 60.4 | scaffold69.0   | 382,415   |
| Pyb05_149 | SNP | 5 | 61.9 | scaffold69.0   | 345,129   |
| Pyb05_154 | SNP | 5 | 65.7 | scaffold45.0   | 794,829   |
| Pyb05_157 | SNP | 5 | 66.7 | scaffold45.0   | 1,006,260 |
| Pyb05_158 | SNP | 5 | 67.1 | scaffold925.0  | 59,025    |
| Pyb05_159 | SNP | 5 | 67.6 | scaffold561.0  | 101,399   |
| Pyb05_160 | SNP | 5 | 67.7 | scaffold45.0   | 1,091,289 |
| Pyb05_164 | SNP | 5 | 67.8 | scaffold925.0  | 99,558    |
| Pyb05_169 | SNP | 5 | 68.8 | scaffold529.0  | 319,783   |
| Pyb05_171 | SNP | 5 | 68.8 | scaffold340.0  | 195,343   |
| Pyb05_173 | SNP | 5 | 68.8 | scaffold410.0  | 240,682   |
| Pyb05_175 | SNP | 5 | 68.8 | scaffold410.0  | 20,313    |
| Pyb05_177 | SNP | 5 | 68.8 | scaffold410.0  | 113,372   |
| Pyb05_178 | SNP | 5 | 68.8 | scaffold410.0  | 391,292   |
| Pyb05_180 | SNP | 5 | 68.8 | scaffold678.0  | 10,993    |
| Pyb05_182 | SNP | 5 | 68.8 | scaffold600.0  | 48,153    |
| Pyb05_183 | SNP | 5 | 69.1 | scaffold691.0  | 93,425    |
| Pyb05_184 | SNP | 5 | 69.1 | scaffold410.0  | 34,316    |
| Pyb05_185 | SNP | 5 | 71.6 | scaffold405.0  | 57,709    |
| Pyb05_191 | SNP | 5 | 73.0 | scaffold405.0  | 225,496   |
| Pyb05_192 | SNP | 5 | 73.1 | scaffold405.0  | 154,472   |
| Pyb05_193 | SNP | 5 | 73.1 | scaffold405.0  | 130,092   |
| Pyd05_039 | SNP | 5 | 73.1 | scaffold139.0  | 223,182   |
| Pyb05_198 | SNP | 5 | 75.5 | scaffold53.0   | 86,834    |
| Pyd05_046 | SNP | 5 | 78.2 | scaffold28.0   | 468,711   |
| Pyb05_202 | SNP | 5 | 78.4 | scaffold28.0   | 413,056   |
| Pyb05_203 | SNP | 5 | 78.4 | scaffold28.0   | 361,514   |
| Pyb05_204 | SNP | 5 | 78.5 | scaffold388.0  | 14,944    |
| Pyb05_205 | SNP | 5 | 78.5 | scaffold28.0   | 361,525   |
| Pyb05_207 | SNP | 5 | 78.6 | scaffold859.0  | 10,498    |
| Pyb05_214 | SNP | 5 | 83.0 | scaffold780.0  | 21,173    |
| Pyd05_052 | SNP | 5 | 83.5 | scaffold1119.0 | 99,682    |
| Pyd05_053 | SNP | 5 | 83.6 | scaffold405.0  | 158,928   |
| Pyd05_054 | SNP | 5 | 83.7 | scaffold1596.0 | 16,564    |

---

|                  |            |          |              |                    |                            |
|------------------|------------|----------|--------------|--------------------|----------------------------|
| Pyd05_055        | SNP        | 5        | 83.9         | scaffold599.0      | 220,570                    |
| Pybd05_010       | SNP        | 5        | 87.8         | scaffold523.0      | 206,179                    |
| Pyb05_217        | SNP        | 5        | 91.4         | scaffold666.0      | 17,787                     |
| Pybd05_014       | SNP        | 5        | 102.4        | scaffold405.0      | 158,985                    |
| Pyb05_224        | SNP        | 5        | 105.2        | scaffold45.0       | 1,063,271                  |
| Pyb05_226        | SNP        | 5        | 106.0        | scaffold45.0       | 818,784                    |
| Pyb05_232        | SNP        | 5        | 109.4        | scaffold241.0      | 426,553                    |
| Pyb05_233        | SNP        | 5        | 109.5        | scaffold241.0      | 218,904                    |
| Pyb05_234        | SNP        | 5        | 109.8        | scaffold372.0      | 133,610                    |
| Pybd05_017       | SNP        | 5        | 111.9        | scaffold69.0       | 576,182                    |
| Pyb05_237        | SNP        | 5        | 112.3        | scaffold69.0       | 719,630                    |
| Pyb05_238        | SNP        | 5        | 112.4        | scaffold69.0       | 702,450                    |
| Pyb05_239        | SNP        | 5        | 112.5        | scaffold69.0       | 612,329                    |
| Pybd05_018       | SNP        | 5        | 114.7        | scaffold69.0       | 178,695                    |
| Pyb05_241        | SNP        | 5        | 117.9        | scaffold6.0        | 399,158                    |
| Pyb05_242        | SNP        | 5        | 118.0        | scaffold6.0        | 351,346                    |
| Pyb05_244        | SNP        | 5        | 118.5        | scaffold6.0        | 410,896                    |
| Pyb05_246        | SNP        | 5        | 118.6        | scaffold6.0        | 430,366                    |
| Pyb05_247        | SNP        | 5        | 118.7        | scaffold6.0        | 461,765                    |
| Pyb05_250        | SNP        | 5        | 118.7        | scaffold6.0        | 459,459                    |
| Pyb05_252        | SNP        | 5        | 118.7        | scaffold6.0        | 295,304                    |
| Pyb05_253        | SNP        | 5        | 118.8        | scaffold6.0        | 413,209                    |
| Pyb05_254        | SNP        | 5        | 118.8        | scaffold6.0        | 202,074                    |
| <b>TsuENH086</b> | <b>SSR</b> | <b>5</b> | <b>118.9</b> | <b>scaffold6.0</b> | <b>1,043,997-1,044,355</b> |
| Pyb05_255        | SNP        | 5        | 118.9        | scaffold6.0        | 206,117                    |
| Pybd05_020       | SNP        | 5        | 120.0        | scaffold1173.0     | 54,794                     |
| Pyd05_065        | SNP        | 5        | 121.6        | scaffold69.0       | 729,130                    |
| Pyd05_066        | SNP        | 5        | 121.6        | scaffold69.0       | 680,905                    |
| Pyb05_258        | SNP        | 5        | 122.1        | scaffold40.0       | 705,750                    |
| Pyb05_259        | SNP        | 5        | 122.3        | scaffold40.0       | 655,904                    |
| Pyb05_260        | SNP        | 5        | 123.0        | scaffold40.0       | 510,712                    |
| Pyb05_262        | SNP        | 5        | 123.0        | scaffold40.0       | 501,298                    |
| Pyb05_263        | SNP        | 5        | 123.0        | scaffold40.0       | 571,294                    |
| Pyb05_264        | SNP        | 5        | 123.5        | scaffold40.0       | 410,654                    |
| Pyb05_266        | SNP        | 5        | 126.0        | scaffold69.0       | 303,451                    |
| Pyb05_268        | SNP        | 5        | 127.0        | scaffold554.0      | 54,388                     |
| Pyb05_269        | SNP        | 5        | 127.1        | scaffold554.0      | 73,448                     |
| Pybd05_021       | SNP        | 5        | 129.8        | scaffold40.0       | 162,780                    |
| Pyd05_073        | SNP        | 5        | 130.8        | scaffold40.0       | 1,216,289                  |
| Pyd05_074        | SNP        | 5        | 133.0        | scaffold92.0       | 279,792                    |
| Pyd05_076        | SNP        | 5        | 137.3        | scaffold92.0       | 808,601                    |
| Pyd05_077        | SNP        | 5        | 137.3        | scaffold110.0      | 929,331                    |
| Pyd05_078        | SNP        | 5        | 137.4        | scaffold110.0      | 773,805                    |
| Pyb05_271        | SNP        | 5        | 139.7        | scaffold430.0      | 373,131                    |

|                |            |          |       |               |                 |
|----------------|------------|----------|-------|---------------|-----------------|
| <b>EMPe106</b> | <b>SSR</b> | <b>5</b> | 139.9 | scaffold92.0  | 68,217-68,357   |
| Pyb05_273      | SNP        | 5        | 141.6 | scaffold6.0   | 464,760         |
| Pyb05_274      | SNP        | 5        | 141.6 | scaffold430.0 | 109,494         |
| Pyb05_275      | SNP        | 5        | 141.9 | scaffold430.0 | 387,930         |
| Pyb05_276      | SNP        | 5        | 142.0 | scaffold6.0   | 120,918         |
| Pyb05_284      | SNP        | 5        | 143.7 | scaffold40.0  | 698,329         |
| Pyb05_285      | SNP        | 5        | 143.9 | scaffold40.0  | 693,537         |
| Pyb05_287      | SNP        | 5        | 145.2 | scaffold40.0  | 242,724         |
| Pybd05_023     | SNP        | 5        | 145.6 | scaffold110.0 | 673,140         |
| Pyb05_293      | SNP        | 5        | 147.0 | scaffold110.0 | 110,651         |
| Pyb05_295      | SNP        | 5        | 147.1 | scaffold110.0 | 113,908         |
| Pyb05_297      | SNP        | 5        | 147.4 | scaffold110.0 | 386,150         |
| Pyb05_298      | SNP        | 5        | 147.4 | scaffold110.0 | 828,098         |
| Pyb05_301      | SNP        | 5        | 147.6 | scaffold92.0  | 778,297         |
| Pyb05_303      | SNP        | 5        | 147.6 | scaffold92.0  | 632,878         |
| Pyb05_304      | SNP        | 5        | 147.6 | scaffold92.0  | 669,709         |
| Pyb05_305      | SNP        | 5        | 147.6 | scaffold92.0  | 597,256         |
| Pyb05_306      | SNP        | 5        | 147.6 | scaffold92.0  | 891,775         |
| Pyb05_307      | SNP        | 5        | 147.7 | scaffold92.0  | 351,919         |
| Pyb05_308      | SNP        | 5        | 147.7 | scaffold56.0  | 65,089          |
| Pyb05_312      | SNP        | 5        | 147.9 | scaffold110.0 | 413,387         |
| Pyb05_314      | SNP        | 5        | 147.9 | scaffold92.0  | 450,647         |
| Pyb05_316      | SNP        | 5        | 147.9 | scaffold92.0  | 800,875         |
| Pyb05_317      | SNP        | 5        | 147.9 | scaffold92.0  | 638,329         |
| Pyb05_318      | SNP        | 5        | 148.0 | scaffold110.0 | 636,041         |
| Pyb05_321      | SNP        | 5        | 148.0 | scaffold110.0 | 182,658         |
| Pyb05_322      | SNP        | 5        | 148.0 | scaffold92.0  | 614,236         |
| Pyb05_323      | SNP        | 5        | 148.0 | scaffold110.0 | 691,743         |
| Pyb05_324      | SNP        | 5        | 148.0 | scaffold110.0 | 800,511         |
| Pyb05_326      | SNP        | 5        | 148.0 | scaffold110.0 | 636,082         |
| Pyb05_327      | SNP        | 5        | 148.0 | scaffold110.0 | 710,623         |
| Pyb05_328      | SNP        | 5        | 148.0 | scaffold110.0 | 699,949         |
| Pyb05_329      | SNP        | 5        | 148.1 | scaffold110.0 | 742,697         |
| Pyb05_331      | SNP        | 5        | 148.1 | scaffold110.0 | 563,373         |
| Pyb05_332      | SNP        | 5        | 148.1 | scaffold110.0 | 774,306         |
| <b>CH04g09</b> | <b>SSR</b> | <b>5</b> | 148.2 | scaffold448.0 | 380,563-380,679 |
| Pyb05_336      | SNP        | 5        | 148.4 | scaffold40.0  | 350,093         |
| Pyb05_338      | SNP        | 5        | 148.4 | scaffold92.0  | 259,689         |
| Pyb05_340      | SNP        | 5        | 148.6 | scaffold40.0  | 416,193         |
| Pyb05_341      | SNP        | 5        | 148.6 | scaffold40.0  | 385,511         |
| Pyb05_343      | SNP        | 5        | 148.6 | scaffold40.0  | 453,095         |
| Pyb05_345      | SNP        | 5        | 148.7 | scaffold40.0  | 401,702         |
| Pybd05_024     | SNP        | 5        | 148.8 | scaffold110.0 | 95,123          |
| Pyb05_350      | SNP        | 5        | 149.5 | scaffold110.0 | 87,117          |

|                |            |          |       |                |                     |
|----------------|------------|----------|-------|----------------|---------------------|
| Pyb05_351      | SNP        | 5        | 149.9 | scaffold110.0  | 117,877             |
| Pyb05_352      | SNP        | 5        | 150.0 | scaffold56.0   | 21,844              |
| Pyb05_354      | SNP        | 5        | 151.2 | scaffold56.0   | 131,850             |
| Pyb05_356      | SNP        | 5        | 151.4 | scaffold56.0   | 147,417             |
| Pyb05_357      | SNP        | 5        | 151.6 | scaffold216.0  | 3,597               |
| Pyb05_358      | SNP        | 5        | 151.6 | scaffold97.0   | 291,006             |
| Pyb05_359      | SNP        | 5        | 151.7 | scaffold97.0   | 166,403             |
| Pyb05_360      | SNP        | 5        | 151.7 | scaffold97.0   | 58,460              |
| Pyb05_361      | SNP        | 5        | 151.9 | scaffold97.0   | 429,731             |
| Pyb05_362      | SNP        | 5        | 152.1 | scaffold593.0  | 10,431              |
| Pyb05_365      | SNP        | 5        | 152.9 | scaffold97.0   | 903,911             |
| Pybd05_026     | SNP        | 5        | 156.0 | scaffold97.0   | 152,346             |
| Pybd05_027     | SNP        | 5        | 156.3 | scaffold1.0    | 1,209,639           |
| Pyb05_368      | SNP        | 5        | 161.4 | scaffold1313.0 | 13,263              |
| Pyb05_370      | SNP        | 5        | 161.5 | scaffold1650.0 | 1,004               |
| Pyb05_371      | SNP        | 5        | 161.6 | scaffold97.0   | 397,070             |
| Pyb05_372      | SNP        | 5        | 161.8 | scaffold1698.0 | 4,890               |
| Pyb05_373      | SNP        | 5        | 161.8 | scaffold216.0  | 3,631               |
| Pyb05_374      | SNP        | 5        | 161.9 | scaffold97.0   | 170,553             |
| Pyb05_375      | SNP        | 5        | 162.1 | scaffold1.0    | 4,114,200           |
| Pyb05_376      | SNP        | 5        | 162.4 | scaffold97.0   | 203,429             |
| Pyb05_379      | SNP        | 5        | 162.6 | scaffold97.0   | 470,663             |
| Pyb05_380      | SNP        | 5        | 162.6 | scaffold97.0   | 741,019             |
| Pyb05_386      | SNP        | 5        | 162.8 | scaffold97.0   | 691,486             |
| Pyb05_387      | SNP        | 5        | 162.8 | scaffold97.0   | 522,466             |
| Pyb05_389      | SNP        | 5        | 162.8 | scaffold97.0   | 502,339             |
| Pyb05_390      | SNP        | 5        | 163.1 | scaffold1.0    | 3,930,775           |
| Pyb05_394      | SNP        | 5        | 163.6 | scaffold1.0    | 4,080,130           |
| Pyb05_395      | SNP        | 5        | 163.6 | scaffold1.0    | 3,999,158           |
| Pyb05_396      | SNP        | 5        | 163.6 | scaffold1.0    | 3,736,120           |
| Pyb05_398      | SNP        | 5        | 163.7 | scaffold1.0    | 3,907,827           |
| Pyb05_400      | SNP        | 5        | 163.7 | scaffold1.0    | 3,990,985           |
| Pyb05_401      | SNP        | 5        | 163.7 | scaffold1.0    | 3,882,333           |
| Pyb05_404      | SNP        | 5        | 163.9 | scaffold1.0    | 4,004,763           |
| Pyb05_405      | SNP        | 5        | 164.0 | scaffold1.0    | 4,100,458           |
| Pyb05_409      | SNP        | 5        | 164.1 | scaffold1.0    | 4,109,939           |
| Pyb05_410      | SNP        | 5        | 164.4 | scaffold1.0    | 3,669,638           |
| Pyb05_411      | SNP        | 5        | 164.4 | scaffold1.0    | 3,765,974           |
| <b>Hi09b04</b> | <b>SSR</b> | <b>5</b> | 165.5 | scaffold1.0    | 2,776,229-2,775,873 |
| Pyb05_415      | SNP        | 5        | 166.5 | scaffold1.0    | 3,541,400           |
| Pyb05_416      | SNP        | 5        | 166.6 | scaffold1.0    | 3,458,406           |
| Pyb05_419      | SNP        | 5        | 167.0 | scaffold1.0    | 2,849,681           |
| Pyb05_420      | SNP        | 5        | 167.1 | scaffold1.0    | 3,437,243           |
| Pyb05_421      | SNP        | 5        | 167.1 | scaffold1.0    | 3,437,221           |

|                |            |          |            |               |                 |
|----------------|------------|----------|------------|---------------|-----------------|
| Pyb05_423      | SNP        | 5        | 167.1      | scaffold1.0   | 3,402,067       |
| Pyb05_425      | SNP        | 5        | 167.1      | scaffold1.0   | 3,466,097       |
| Pyb05_427      | SNP        | 5        | 167.2      | scaffold1.0   | 3,391,916       |
| Pyb05_428      | SNP        | 5        | 167.2      | scaffold1.0   | 3,418,214       |
| Pyb05_430      | SNP        | 5        | 167.6      | scaffold1.0   | 2,571,854       |
| Pyb05_431      | SNP        | 5        | 167.8      | scaffold1.0   | 2,915,515       |
| Pyb05_433      | SNP        | 5        | 167.8      | scaffold1.0   | 3,300,242       |
| Pyb05_437      | SNP        | 5        | 168.0      | scaffold1.0   | 2,390,065       |
| Pyb05_439      | SNP        | 5        | 168.1      | scaffold1.0   | 3,330,261       |
| Pyb05_441      | SNP        | 5        | 168.1      | scaffold1.0   | 3,042,100       |
| Pyb05_442      | SNP        | 5        | 168.4      | scaffold1.0   | 2,758,877       |
| Pyb05_448      | SNP        | 5        | 169.3      | scaffold1.0   | 2,504,217       |
| Pyb05_449      | SNP        | 5        | 169.5      | scaffold1.0   | 2,122,134       |
| Pyb05_455      | SNP        | 5        | 170.6      | scaffold1.0   | 539,478         |
| Pyb05_456      | SNP        | 5        | 170.6      | scaffold1.0   | 1,156,339       |
| Pyb05_458      | SNP        | 5        | 170.7      | scaffold1.0   | 1,453,219       |
| Pyb05_460      | SNP        | 5        | 170.7      | scaffold1.0   | 102,599         |
| Pyb05_464      | SNP        | 5        | 170.9      | scaffold1.0   | 1,642,728       |
| Pyb05_465      | SNP        | 5        | 170.9      | scaffold1.0   | 40,489          |
| Pyb05_466      | SNP        | 5        | 170.9      | scaffold1.0   | 532,737         |
| Pyb05_467      | SNP        | 5        | 170.9      | scaffold1.0   | 252,473         |
| Pyb05_468      | SNP        | 5        | 170.9      | scaffold1.0   | 522,732         |
| Pyb05_469      | SNP        | 5        | 171.0      | scaffold1.0   | 890,253         |
| Pyb05_470      | SNP        | 5        | 171.0      | scaffold1.0   | 1,160,091       |
| Pyb05_474      | SNP        | 5        | 171.5      | scaffold1.0   | 312,520         |
| Pyb05_475      | SNP        | 5        | 171.5      | scaffold1.0   | 172,474         |
| Pyb05_476      | SNP        | 5        | 171.5      | scaffold1.0   | 247,689         |
| Pyb05_477      | SNP        | 5        | 171.6      | scaffold1.0   | 539,211         |
| Pyb05_478      | SNP        | 5        | 171.8      | scaffold1.0   | 1,647,741       |
| Pyb05_480      | SNP        | 5        | 172.0      | scaffold1.0   | 239,906         |
| Pyb05_481      | SNP        | 5        | 172.0      | scaffold1.0   | 325,212         |
| Pyb05_482      | SNP        | 5        | 172.1      | scaffold1.0   | 1,154,626       |
| Pyb05_483      | SNP        | 5        | 172.1      | scaffold1.0   | 1,156,311       |
| Pybd05_030     | SNP        | 5        | 172.8      | scaffold97.0  | 39,061          |
| Pyd05_094      | SNP        | 5        | 177.1      | scaffold97.0  | 893,290         |
| Pyd06_007      | SNP        | 6        | 0.0        | scaffold180.0 | 322,168         |
| Pyd06_008      | SNP        | 6        | 0.0        | scaffold180.0 | 295,352         |
| <b>CH03d12</b> | <b>SSR</b> | <b>6</b> | <b>0.8</b> | scaffold263.0 | 498,540-498,718 |
| Pyb06_011      | SNP        | 6        | 1.2        | scaffold760.0 | 99,646          |
| Pyb06_012      | SNP        | 6        | 1.2        | scaffold263.0 | 279,653         |
| Pyb06_013      | SNP        | 6        | 1.2        | scaffold444.0 | 233,033         |
| Pyb06_015      | SNP        | 6        | 1.5        | scaffold444.0 | 132,184         |
| Pyb06_028      | SNP        | 6        | 9.7        | scaffold180.0 | 294,546         |
| Pyb06_030      | SNP        | 6        | 9.7        | scaffold180.0 | 147,141         |

|           |     |   |      |               |                 |
|-----------|-----|---|------|---------------|-----------------|
| Pyb06_031 | SNP | 6 | 9.8  | scaffold180.0 | 281,803         |
| Pyb06_033 | SNP | 6 | 10.5 | scaffold511.0 | 172,740         |
| Pyb06_035 | SNP | 6 | 11.4 | scaffold47.0  | 757,366         |
| Pyb06_036 | SNP | 6 | 11.7 | scaffold47.0  | 84,483          |
| Pyb06_039 | SNP | 6 | 11.8 | scaffold47.0  | 398,092         |
| Pyb06_041 | SNP | 6 | 12.0 | scaffold30.0  | 1,061,718       |
| Pyb06_042 | SNP | 6 | 12.1 | scaffold82.0  | 210,814         |
| U78949x   | SSR | 6 | 12.1 | scaffold30.0  | 261,825-262,021 |
| Pyb06_045 | SNP | 6 | 12.2 | scaffold47.0  | 316,385         |
| Pyb06_047 | SNP | 6 | 12.3 | scaffold47.0  | 94,860          |
| Pyb06_048 | SNP | 6 | 12.3 | scaffold47.0  | 513,472         |
| Pyb06_049 | SNP | 6 | 12.3 | scaffold30.0  | 11,449          |
| Pyb06_052 | SNP | 6 | 12.4 | scaffold47.0  | 83,110          |
| Pyb06_054 | SNP | 6 | 12.4 | scaffold30.0  | 571,302         |
| Pyb06_056 | SNP | 6 | 12.4 | scaffold30.0  | 846,392         |
| Pyb06_059 | SNP | 6 | 12.4 | scaffold30.0  | 72,859          |
| Pyb06_060 | SNP | 6 | 12.5 | scaffold511.0 | 2,868           |
| Pyb06_061 | SNP | 6 | 12.5 | scaffold30.0  | 250,698         |
| Pyb06_062 | SNP | 6 | 12.5 | scaffold30.0  | 143,766         |
| Pyb06_065 | SNP | 6 | 12.5 | scaffold30.0  | 240,803         |
| Pyb06_066 | SNP | 6 | 12.5 | scaffold30.0  | 229,107         |
| Pyb06_067 | SNP | 6 | 12.6 | scaffold30.0  | 143,813         |
| Pyb06_068 | SNP | 6 | 12.6 | scaffold511.0 | 17,185          |
| Pyb06_070 | SNP | 6 | 12.6 | scaffold30.0  | 216,073         |
| Pyb06_073 | SNP | 6 | 12.8 | scaffold30.0  | 730,951         |
| Pyb06_074 | SNP | 6 | 12.8 | scaffold30.0  | 942,498         |
| Pyb06_075 | SNP | 6 | 12.9 | scaffold47.0  | 400,927         |
| Pyb06_076 | SNP | 6 | 12.9 | scaffold30.0  | 1,273,156       |
| Pyb06_077 | SNP | 6 | 12.9 | scaffold30.0  | 745,264         |
| Pyb06_078 | SNP | 6 | 12.9 | scaffold47.0  | 121,447         |
| Pyb06_080 | SNP | 6 | 12.9 | scaffold30.0  | 1,003,321       |
| Pyb06_081 | SNP | 6 | 12.9 | scaffold30.0  | 1,273,128       |
| Pyb06_083 | SNP | 6 | 12.9 | scaffold47.0  | 77,577          |
| Pyb06_085 | SNP | 6 | 13.2 | scaffold30.0  | 1,028,209       |
| Pyb06_086 | SNP | 6 | 13.2 | scaffold47.0  | 812,162         |
| Pyb06_087 | SNP | 6 | 13.2 | scaffold30.0  | 411,104         |
| Pyb06_090 | SNP | 6 | 13.6 | scaffold180.0 | 114,893         |
| Pyb06_093 | SNP | 6 | 14.0 | scaffold180.0 | 65,325          |
| Pyb06_094 | SNP | 6 | 14.0 | scaffold511.0 | 195,730         |
| Pyb06_095 | SNP | 6 | 14.2 | scaffold511.0 | 184,816         |
| Pyb06_096 | SNP | 6 | 14.7 | scaffold30.0  | 654,726         |
| Pyb06_097 | SNP | 6 | 14.8 | scaffold30.0  | 705,653         |
| Pyb06_100 | SNP | 6 | 16.6 | scaffold30.0  | 877,306         |
| Pyb06_103 | SNP | 6 | 17.7 | scaffold30.0  | 1,271,006       |

|                   |            |          |             |               |                 |
|-------------------|------------|----------|-------------|---------------|-----------------|
| Pybd06_005        | SNP        | 6        | 19.5        | scaffold30.0  | 601,634         |
| Pybd06_006        | SNP        | 6        | 20.1        | scaffold30.0  | 135,699         |
| Pybd06_007        | SNP        | 6        | 21.7        | scaffold30.0  | 1,288,081       |
| Pyb06_106         | SNP        | 6        | 23.8        | scaffold511.0 | 324,480         |
| Pybd06_008        | SNP        | 6        | 26.4        | scaffold47.0  | 553,919         |
| Pybd06_009        | SNP        | 6        | 28.8        | scaffold47.0  | 903,721         |
| Pyd06_017         | SNP        | 6        | 29.6        | scaffold67.0  | 647,937         |
| Pyd06_020         | SNP        | 6        | 31.5        | scaffold67.0  | 1,093,237       |
| Pyd06_024         | SNP        | 6        | 33.6        | scaffold642.0 | 46,169          |
| Pyd06_026         | SNP        | 6        | 33.8        | scaffold642.0 | 50,044          |
| Pyb06_109         | SNP        | 6        | 35.9        | scaffold180.0 | 383,516         |
| Pyb06_110         | SNP        | 6        | 36.0        | scaffold180.0 | 500,172         |
| Pyb06_112         | SNP        | 6        | 36.2        | scaffold180.0 | 484,193         |
| Pyb06_113         | SNP        | 6        | 36.3        | scaffold180.0 | 436,047         |
| Pybd06_010        | SNP        | 6        | 36.6        | scaffold373.0 | 24,475          |
| Pyb06_117         | SNP        | 6        | 37.3        | scaffold180.0 | 554,111         |
| Pyb06_120         | SNP        | 6        | 37.9        | scaffold180.0 | 580,575         |
| <b>CTG1063987</b> | <b>SSR</b> | <b>6</b> | <b>41.5</b> | scaffold373.0 | 194,270-194,396 |
| Pyb06_134         | SNP        | 6        | 42.1        | scaffold373.0 | 217,199         |
| Pyd06_032         | SNP        | 6        | 42.2        | scaffold67.0  | 742,259         |
| Pyb06_136         | SNP        | 6        | 42.4        | scaffold373.0 | 238,621         |
| Pyb06_138         | SNP        | 6        | 42.5        | scaffold373.0 | 359,243         |
| Pyb06_142         | SNP        | 6        | 43.2        | scaffold373.0 | 314,075         |
| Pyb06_149         | SNP        | 6        | 43.6        | scaffold373.0 | 44,164          |
| Pyb06_150         | SNP        | 6        | 43.7        | scaffold506.0 | 256,904         |
| Pyb06_151         | SNP        | 6        | 43.7        | scaffold506.0 | 162,608         |
| Pyb06_152         | SNP        | 6        | 43.7        | scaffold506.0 | 226,734         |
| Pyb06_154         | SNP        | 6        | 44.1        | scaffold373.0 | 16,480          |
| Pyb06_155         | SNP        | 6        | 44.1        | scaffold172.0 | 100,783         |
| Pyb06_156         | SNP        | 6        | 44.1        | scaffold74.0  | 370,955         |
| Pyb06_159         | SNP        | 6        | 44.2        | scaffold506.0 | 286,551         |
| Pyb06_162         | SNP        | 6        | 45.7        | scaffold81.0  | 558,459         |
| Pyb06_163         | SNP        | 6        | 45.9        | scaffold67.0  | 1,025,002       |
| Pyb06_164         | SNP        | 6        | 46.0        | scaffold67.0  | 1,094,220       |
| Pyb06_165         | SNP        | 6        | 46.0        | scaffold81.0  | 417,197         |
| Pyb06_166         | SNP        | 6        | 46.1        | scaffold81.0  | 295,028         |
| Pyd06_038         | SNP        | 6        | 46.1        | scaffold81.0  | 469,190         |
| Pyb06_168         | SNP        | 6        | 46.1        | scaffold81.0  | 485,795         |
| Pyb06_169         | SNP        | 6        | 46.1        | scaffold81.0  | 238,230         |
| Pyb06_170         | SNP        | 6        | 46.1        | scaffold75.0  | 880,248         |
| Pyb06_171         | SNP        | 6        | 46.2        | scaffold81.0  | 439,264         |
| Pyb06_173         | SNP        | 6        | 46.3        | scaffold81.0  | 454,653         |
| Pyb06_174         | SNP        | 6        | 46.3        | scaffold67.0  | 758,255         |
| Pyb06_175         | SNP        | 6        | 46.3        | scaffold81.0  | 61,264          |

|                |            |          |             |                     |                        |
|----------------|------------|----------|-------------|---------------------|------------------------|
| Pyd06_039      | SNP        | 6        | 46.3        | scaffold506.0       | 117,776                |
| Pyb06_177      | SNP        | 6        | 46.3        | scaffold81.0        | 503,800                |
| Pyb06_181      | SNP        | 6        | 46.6        | scaffold67.0        | 355,354                |
| Pyb06_182      | SNP        | 6        | 46.6        | scaffold67.0        | 369,909                |
| Pyd06_040      | SNP        | 6        | 46.8        | scaffold172.0       | 39,404                 |
| Pyb06_184      | SNP        | 6        | 47.3        | scaffold81.0        | 255,682                |
| Pyb06_186      | SNP        | 6        | 48.4        | scaffold67.0        | 382,781                |
| Pyb06_188      | SNP        | 6        | 48.8        | scaffold1160.0      | 47,211                 |
| Pyb06_189      | SNP        | 6        | 48.9        | scaffold1160.0      | 93,046                 |
| Pyb06_191      | SNP        | 6        | 49.3        | scaffold21.0        | 273,149                |
| Pyb06_192      | SNP        | 6        | 49.3        | scaffold21.0        | 184,602                |
| Pyb06_193      | SNP        | 6        | 49.4        | scaffold21.0        | 304,799                |
| Pyb06_194      | SNP        | 6        | 49.4        | scaffold21.0        | 261,648                |
| Pyb06_196      | SNP        | 6        | 49.5        | scaffold21.0        | 179,709                |
| Pyb06_199      | SNP        | 6        | 50.3        | scaffold389.0       | 203,541                |
| Pyb06_202      | SNP        | 6        | 50.5        | scaffold21.0        | 142,755                |
| Pyb06_203      | SNP        | 6        | 50.7        | scaffold389.0       | 201,539                |
| Pyb06_206      | SNP        | 6        | 51.1        | scaffold389.0       | 190,525                |
| Pyb06_207      | SNP        | 6        | 51.1        | scaffold389.0       | 84,800                 |
| Pyb06_208      | SNP        | 6        | 51.2        | scaffold21.0        | 153,690                |
| Pyb06_209      | SNP        | 6        | 51.4        | scaffold389.0       | 185,893                |
| Pyb06_210      | SNP        | 6        | 51.7        | scaffold729.0       | 87,001                 |
| Pyb06_211      | SNP        | 6        | 51.8        | scaffold1318.0      | 68,448                 |
| Pyb06_212      | SNP        | 6        | 52.2        | scaffold389.0       | 310,255                |
| <b>CH01b11</b> | <b>SSR</b> | <b>6</b> | <b>52.8</b> | <b>scaffold67.0</b> | <b>703,750-703,931</b> |
| Pybd06_014     | SNP        | 6        | 52.8        | scaffold67.0        | 590,039                |
| Pybd06_015     | SNP        | 6        | 54.3        | scaffold67.0        | 589,975                |
| Pybd06_016     | SNP        | 6        | 56.8        | scaffold67.0        | 385,227                |
| Pyb06_221      | SNP        | 6        | 65.7        | scaffold176.0       | 453,131                |
| Pyb06_222      | SNP        | 6        | 65.7        | scaffold540.0       | 44,697                 |
| Pyb06_227      | SNP        | 6        | 67.8        | scaffold729.0       | 86,974                 |
| Pyb06_228      | SNP        | 6        | 67.8        | scaffold109.0       | 647,544                |
| Pyb06_229      | SNP        | 6        | 67.8        | scaffold109.0       | 484,290                |
| Pyb06_237      | SNP        | 6        | 70.1        | scaffold932.0       | 26,268                 |
| Pyb06_238      | SNP        | 6        | 70.1        | scaffold932.0       | 27,094                 |
| Pyb06_239      | SNP        | 6        | 70.3        | scaffold932.0       | 113,719                |
| Pybd06_018     | SNP        | 6        | 70.9        | scaffold176.0       | 502,030                |
| Pyb06_241      | SNP        | 6        | 71.3        | scaffold1356.0      | 45,522                 |
| Pyb06_244      | SNP        | 6        | 71.9        | scaffold540.0       | 32,377                 |
| Pyb06_248      | SNP        | 6        | 72.0        | scaffold540.0       | 1,560                  |
| Pybd06_019     | SNP        | 6        | 72.3        | scaffold540.0       | 11,473                 |
| Pyb06_252      | SNP        | 6        | 72.6        | scaffold176.0       | 486,828                |
| Pybd06_020     | SNP        | 6        | 73.1        | scaffold176.0       | 623,403                |
| Pyb06_266      | SNP        | 6        | 77.7        | scaffold104.0       | 160,733                |



|                   |            |          |             |                |                 |
|-------------------|------------|----------|-------------|----------------|-----------------|
| Pyb06_267         | SNP        | 6        | 77.8        | scaffold104.0  | 85,081          |
| Pyb06_281         | SNP        | 6        | 81.1        | scaffold582.0  | 21,375          |
| Pyb06_283         | SNP        | 6        | 81.5        | scaffold7.0    | 444,253         |
| Pyb06_284         | SNP        | 6        | 81.6        | scaffold946.0  | 133,185         |
| Pyb06_286         | SNP        | 6        | 81.7        | scaffold201.0  | 504,936         |
| Pyb06_290         | SNP        | 6        | 81.9        | scaffold894.0  | 142,236         |
| Pyb06_291         | SNP        | 6        | 82.0        | scaffold215.0  | 188,506         |
| Pyb06_292         | SNP        | 6        | 82.0        | scaffold7.0    | 367,453         |
| Pyb06_294         | SNP        | 6        | 82.1        | scaffold672.0  | 92,977          |
| Pyb06_295         | SNP        | 6        | 82.1        | scaffold1523.0 | 10,370          |
| Pyb06_300         | SNP        | 6        | 82.7        | scaffold894.0  | 87,366          |
| Pyb06_301         | SNP        | 6        | 82.7        | scaffold215.0  | 36,889          |
| Pyb06_302         | SNP        | 6        | 82.8        | scaffold737.0  | 86,847          |
| Pyb06_306         | SNP        | 6        | 83.0        | scaffold672.0  | 81,588          |
| Pyd06_057         | SNP        | 6        | 83.0        | scaffold7.0    | 348,899         |
| Pyb06_308         | SNP        | 6        | 83.0        | scaffold7.0    | 254,717         |
| Pyb06_311         | SNP        | 6        | 83.1        | scaffold880.0  | 138,819         |
| Pyb06_313         | SNP        | 6        | 83.2        | scaffold525.0  | 203,418         |
| Pyb06_314         | SNP        | 6        | 83.2        | scaffold182.0  | 10,389          |
| Pyb06_316         | SNP        | 6        | 83.4        | scaffold215.0  | 106,442         |
| Pyb06_317         | SNP        | 6        | 83.5        | scaffold894.0  | 84,820          |
| Pyb06_318         | SNP        | 6        | 83.5        | scaffold215.0  | 18,867          |
| Pyb06_320         | SNP        | 6        | 83.7        | scaffold582.0  | 11,538          |
| Pyb06_321         | SNP        | 6        | 83.8        | scaffold215.0  | 192,502         |
| Pyb06_322         | SNP        | 6        | 83.9        | scaffold215.0  | 115,003         |
| Pyb06_323         | SNP        | 6        | 83.9        | scaffold894.0  | 129,413         |
| Pyd06_059         | SNP        | 6        | 86.0        | scaffold215.0  | 617,202         |
| <b>CTG1070694</b> | <b>SSR</b> | <b>6</b> | <b>96.1</b> | scaffold136.0  | 379,291-379,516 |
| Pyd06_062         | SNP        | 6        | 96.2        | scaffold136.0  | 497,617         |
| Pyd06_063         | SNP        | 6        | 96.5        | scaffold136.0  | 364,308         |
| Pyd06_064         | SNP        | 6        | 96.8        | scaffold136.0  | 292,858         |
| Pybd06_026        | SNP        | 6        | 101.0       | scaffold240.0  | 291,698         |
| Pyd06_072         | SNP        | 6        | 102.8       | scaffold203.0  | 554,888         |
| Pyb06_330         | SNP        | 6        | 106.4       | scaffold223.0  | 351,021         |
| Pyb06_335         | SNP        | 6        | 107.0       | scaffold223.0  | 44,147          |
| Pyb06_336         | SNP        | 6        | 107.2       | scaffold240.0  | 488,645         |
| Pyb06_337         | SNP        | 6        | 107.5       | scaffold136.0  | 537,478         |
| Pyb06_338         | SNP        | 6        | 107.5       | scaffold136.0  | 289,908         |
| Pyb06_339         | SNP        | 6        | 107.5       | scaffold136.0  | 750,004         |
| Pyb06_341         | SNP        | 6        | 107.6       | scaffold223.0  | 391,199         |
| Pyb06_344         | SNP        | 6        | 107.8       | scaffold223.0  | 44,210          |
| Pyb06_345         | SNP        | 6        | 107.9       | scaffold136.0  | 374,520         |
| Pyb06_348         | SNP        | 6        | 108.3       | scaffold136.0  | 309,006         |
| Pyb06_349         | SNP        | 6        | 108.3       | scaffold136.0  | 292,903         |

---

|            |     |   |       |               |           |
|------------|-----|---|-------|---------------|-----------|
| Pyb06_350  | SNP | 6 | 108.3 | scaffold136.0 | 358,167   |
| Pyb06_353  | SNP | 6 | 108.5 | scaffold223.0 | 404,234   |
| Pyb06_355  | SNP | 6 | 108.6 | scaffold223.0 | 577,801   |
| Pyb06_356  | SNP | 6 | 108.8 | scaffold136.0 | 29,135    |
| Pyb06_358  | SNP | 6 | 109.2 | scaffold136.0 | 290,003   |
| Pybd06_028 | SNP | 6 | 109.6 | scaffold240.0 | 134,758   |
| Pyb06_360  | SNP | 6 | 110.9 | scaffold203.0 | 338,368   |
| Pyb06_365  | SNP | 6 | 111.6 | scaffold240.0 | 279,115   |
| Pyb06_372  | SNP | 6 | 112.2 | scaffold240.0 | 308,593   |
| Pyb06_374  | SNP | 6 | 112.4 | scaffold240.0 | 192,137   |
| Pyb06_375  | SNP | 6 | 112.4 | scaffold240.0 | 23,717    |
| Pyb06_379  | SNP | 6 | 113.1 | scaffold240.0 | 35,620    |
| Pyb06_380  | SNP | 6 | 113.1 | scaffold240.0 | 119,798   |
| Pyb06_381  | SNP | 6 | 113.4 | scaffold203.0 | 113,762   |
| Pybd06_029 | SNP | 6 | 113.9 | scaffold215.0 | 27,963    |
| Pyb06_386  | SNP | 6 | 115.2 | scaffold362.0 | 179,300   |
| Pyb06_389  | SNP | 6 | 115.6 | scaffold7.0   | 241,908   |
| Pyb06_397  | SNP | 6 | 115.8 | scaffold7.0   | 273,179   |
| Pybd06_031 | SNP | 6 | 115.9 | scaffold201.0 | 405,962   |
| Pyb06_399  | SNP | 6 | 116.4 | scaffold737.0 | 155,856   |
| Pyb06_400  | SNP | 6 | 116.5 | scaffold215.0 | 177,750   |
| Pybd06_032 | SNP | 6 | 117.4 | scaffold215.0 | 394,576   |
| Pyb06_403  | SNP | 6 | 117.8 | scaffold574.0 | 129,807   |
| Pyb06_405  | SNP | 6 | 118.0 | scaffold36.0  | 1,067,422 |
| Pyb06_408  | SNP | 6 | 120.4 | scaffold7.0   | 444,203   |
| Pyb07_002  | SNP | 7 | 0.0   | scaffold37.0  | 686,864   |
| Pyb07_003  | SNP | 7 | 1.7   | scaffold37.0  | 655,651   |
| Pyb07_004  | SNP | 7 | 2.4   | scaffold37.0  | 538,682   |
| Pyb07_005  | SNP | 7 | 3.3   | scaffold37.0  | 384,928   |
| Pyb07_010  | SNP | 7 | 5.4   | scaffold37.0  | 25,984    |
| Pyb07_012  | SNP | 7 | 5.8   | scaffold95.0  | 544,881   |
| Pyb07_013  | SNP | 7 | 6.3   | scaffold37.0  | 490,260   |
| Pyb07_014  | SNP | 7 | 6.6   | scaffold37.0  | 454,292   |
| Pyb07_015  | SNP | 7 | 6.7   | scaffold37.0  | 274,800   |
| Pyb07_016  | SNP | 7 | 6.8   | scaffold37.0  | 803,232   |
| Pyb07_017  | SNP | 7 | 7.2   | scaffold161.0 | 568,034   |
| Pyb07_019  | SNP | 7 | 7.7   | scaffold37.0  | 769,798   |
| Pyb07_020  | SNP | 7 | 8.0   | scaffold37.0  | 204,331   |
| Pyb07_022  | SNP | 7 | 8.4   | scaffold37.0  | 790,867   |
| Pyb07_023  | SNP | 7 | 8.7   | scaffold37.0  | 741,059   |
| Pyb07_025  | SNP | 7 | 9.2   | scaffold37.0  | 648,456   |
| Pyb07_026  | SNP | 7 | 9.4   | scaffold95.0  | 808,433   |
| Pyb07_027  | SNP | 7 | 9.7   | scaffold161.0 | 45,995    |
| Pyb07_028  | SNP | 7 | 9.9   | scaffold161.0 | 155,316   |

---

|                  |            |          |             |                     |                        |
|------------------|------------|----------|-------------|---------------------|------------------------|
| Pyb07_029        | SNP        | 7        | 10.0        | scaffold161.0       | 233,323                |
| Pyb07_031        | SNP        | 7        | 10.1        | scaffold161.0       | 164,769                |
| Pyb07_032        | SNP        | 7        | 10.2        | scaffold161.0       | 61,888                 |
| Pyb07_033        | SNP        | 7        | 10.3        | scaffold95.0        | 899,087                |
| Pyb07_034        | SNP        | 7        | 10.5        | scaffold161.0       | 392,059                |
| Pyb07_035        | SNP        | 7        | 10.8        | scaffold161.0       | 179,410                |
| Pyb07_038        | SNP        | 7        | 11.5        | scaffold95.0        | 114,605                |
| Pyb07_040        | SNP        | 7        | 11.6        | scaffold95.0        | 534,248                |
| Pyb07_041        | SNP        | 7        | 11.7        | scaffold95.0        | 524,875                |
| Pyb07_043        | SNP        | 7        | 12.1        | scaffold95.0        | 62,814                 |
| Pyb07_044        | SNP        | 7        | 12.5        | scaffold95.0        | 510,146                |
| Pyb07_045        | SNP        | 7        | 13.4        | scaffold454.0       | 298,394                |
| Pyb07_052        | SNP        | 7        | 15.6        | scaffold454.0       | 303,719                |
| Pyb07_055        | SNP        | 7        | 17.0        | scaffold90.0        | 902,764                |
| Pyb07_057        | SNP        | 7        | 17.3        | scaffold454.0       | 106,302                |
| Pyb07_058        | SNP        | 7        | 17.9        | scaffold90.0        | 55,731                 |
| Pyb07_060        | SNP        | 7        | 18.2        | scaffold90.0        | 568,606                |
| Pyb07_061        | SNP        | 7        | 18.5        | scaffold90.0        | 512,897                |
| Pyb07_064        | SNP        | 7        | 19.3        | scaffold90.0        | 394,841                |
| <b>TsuENH006</b> | <b>SSR</b> | <b>7</b> | <b>19.9</b> | <b>scaffold90.0</b> | <b>687,239-687,378</b> |
| Pyb07_065        | SNP        | 7        | 20.2        | scaffold447.0       | 278,207                |
| Pyb07_066        | SNP        | 7        | 20.5        | scaffold90.0        | 383,396                |
| Pyb07_068        | SNP        | 7        | 21.9        | scaffold276.0       | 315,120                |
| Pyb07_073        | SNP        | 7        | 24.3        | scaffold1012.0      | 11,534                 |
| Pyb07_075        | SNP        | 7        | 25.0        | scaffold237.0       | 293,366                |
| Pyb07_077        | SNP        | 7        | 25.6        | scaffold237.0       | 305,253                |
| Pyb07_078        | SNP        | 7        | 25.9        | scaffold418.0       | 71,810                 |
| Pyb07_079        | SNP        | 7        | 25.9        | scaffold728.0       | 35,901                 |
| Pyb07_081        | SNP        | 7        | 26.0        | scaffold728.0       | 40,771                 |
| Pyb07_083        | SNP        | 7        | 26.6        | scaffold1012.0      | 4,220                  |
| Pyb07_085        | SNP        | 7        | 27.1        | scaffold237.0       | 93,546                 |
| Pyb07_086        | SNP        | 7        | 27.3        | scaffold1150.0      | 14,026                 |
| Pyb07_087        | SNP        | 7        | 27.7        | scaffold237.0       | 299,029                |
| Pyb07_088        | SNP        | 7        | 28.0        | scaffold237.0       | 78,582                 |
| Pyb07_089        | SNP        | 7        | 28.3        | scaffold1150.0      | 40,460                 |
| Pyb07_091        | SNP        | 7        | 29.1        | scaffold1150.0      | 50,304                 |
| Pyb07_093        | SNP        | 7        | 30.8        | scaffold278.0       | 49,975                 |
| Pyb07_094        | SNP        | 7        | 31.5        | scaffold278.0       | 393,182                |
| Pyb07_095        | SNP        | 7        | 32.0        | scaffold278.0       | 502,462                |
| Pyb07_100        | SNP        | 7        | 34.3        | scaffold668.0       | 38,606                 |
| Pyb07_102        | SNP        | 7        | 35.3        | scaffold278.0       | 38,587                 |
| Pyb07_104        | SNP        | 7        | 38.3        | scaffold563.0       | 226,344                |
| Pyb07_105        | SNP        | 7        | 38.5        | scaffold563.0       | 130,015                |
| Pyb07_106        | SNP        | 7        | 38.6        | scaffold709.0       | 65,654                 |

|                |            |          |      |                |                     |
|----------------|------------|----------|------|----------------|---------------------|
| Pyb07_108      | SNP        | 7        | 39.0 | scaffold1193.0 | 24,930              |
| Pyb07_109      | SNP        | 7        | 39.2 | scaffold496.0  | 318,964             |
| Pyb07_110      | SNP        | 7        | 39.8 | scaffold146.0  | 597,089             |
| Pyb07_112      | SNP        | 7        | 39.9 | scaffold146.0  | 461,771             |
| Pyb07_114      | SNP        | 7        | 40.5 | scaffold496.0  | 232,823             |
| Pyb07_115      | SNP        | 7        | 41.0 | scaffold146.0  | 462,543             |
| Pyb07_116      | SNP        | 7        | 41.7 | scaffold326.0  | 349,673             |
| Pyb07_117      | SNP        | 7        | 42.2 | scaffold1092.0 | 76,490              |
| Pyb07_119      | SNP        | 7        | 42.6 | scaffold949.0  | 19,875              |
| Pyb07_120      | SNP        | 7        | 42.9 | scaffold557.0  | 203,263             |
| Pyb07_121      | SNP        | 7        | 43.3 | scaffold326.0  | 284,477             |
| Pyb07_122      | SNP        | 7        | 43.8 | scaffold550.0  | 250,758             |
| Pyb07_124      | SNP        | 7        | 45.1 | scaffold550.0  | 141,773             |
| Pyb07_129      | SNP        | 7        | 50.2 | scaffold58.0   | 639,207             |
| Pyb07_130      | SNP        | 7        | 50.5 | scaffold429.0  | 1,875               |
| Pyb07_132      | SNP        | 7        | 51.4 | scaffold58.0   | 930,743             |
| Pyb07_133      | SNP        | 7        | 51.7 | scaffold58.0   | 988,674             |
| Pyb07_134      | SNP        | 7        | 51.9 | scaffold58.0   | 891,986             |
| Pyb07_135      | SNP        | 7        | 53.3 | scaffold18.0   | 1,485,470           |
| <b>EMPe117</b> | <b>SSR</b> | <b>7</b> | 53.4 | scaffold58.0   | 1,068,166-1,067,743 |
| Pyb07_136      | SNP        | 7        | 53.9 | scaffold18.0   | 1,355,569           |
| Pyb07_138      | SNP        | 7        | 54.4 | scaffold18.0   | 1,284,097           |
| Pyb07_139      | SNP        | 7        | 54.7 | scaffold175.0  | 587,095             |
| Pyb07_140      | SNP        | 7        | 55.0 | scaffold175.0  | 169,144             |
| Pyb07_141      | SNP        | 7        | 55.2 | scaffold18.0   | 653,934             |
| Pyb07_142      | SNP        | 7        | 55.5 | scaffold18.0   | 834,637             |
| Pyb07_143      | SNP        | 7        | 55.5 | scaffold18.0   | 744,242             |
| Pyb07_144      | SNP        | 7        | 55.9 | scaffold175.0  | 233,421             |
| Pyb07_146      | SNP        | 7        | 56.2 | scaffold175.0  | 283,336             |
| Pyb07_147      | SNP        | 7        | 56.4 | scaffold175.0  | 145,690             |
| Pyb07_149      | SNP        | 7        | 56.8 | scaffold175.0  | 609,221             |
| Pyb07_150      | SNP        | 7        | 57.1 | scaffold18.0   | 915,836             |
| Pyb07_152      | SNP        | 7        | 57.5 | scaffold175.0  | 474,015             |
| Pyb07_156      | SNP        | 7        | 58.2 | scaffold175.0  | 340,311             |
| <b>EMPe111</b> | <b>SSR</b> | <b>7</b> | 58.5 | scaffold112.0  | 297,012-297,107     |
| Pyb07_158      | SNP        | 7        | 58.5 | scaffold112.0  | 414,733             |
| Pyb07_159      | SNP        | 7        | 59.1 | scaffold175.0  | 613,553             |
| Pyb07_160      | SNP        | 7        | 59.8 | scaffold112.0  | 298,506             |
| Pyb07_167      | SNP        | 7        | 63.1 | scaffold205.0  | 104,863             |
| Pyb07_169      | SNP        | 7        | 63.4 | scaffold205.0  | 195,631             |
| Pyb07_170      | SNP        | 7        | 63.6 | scaffold205.0  | 367,450             |
| Pyb07_172      | SNP        | 7        | 64.3 | scaffold285.0  | 196,331             |
| Pyb07_173      | SNP        | 7        | 64.6 | scaffold285.0  | 196,604             |
| Pyb07_175      | SNP        | 7        | 65.7 | scaffold682.0  | 146,199             |

|                |            |          |            |               |                 |
|----------------|------------|----------|------------|---------------|-----------------|
| Pyb07_176      | SNP        | 7        | 66.2       | scaffold682.0 | 146,158         |
| Pyb07_177      | SNP        | 7        | 66.6       | scaffold87.0  | 618,362         |
| Pyb07_179      | SNP        | 7        | 67.5       | scaffold87.0  | 932,906         |
| Pyb07_180      | SNP        | 7        | 67.7       | scaffold174.0 | 466,483         |
| Pyb07_181      | SNP        | 7        | 67.8       | scaffold174.0 | 114,642         |
| Pyb07_182      | SNP        | 7        | 67.9       | scaffold87.0  | 970,458         |
| Pyb07_183      | SNP        | 7        | 68.1       | scaffold87.0  | 733,498         |
| Pyb07_184      | SNP        | 7        | 68.3       | scaffold174.0 | 353,887         |
| Pyb07_185      | SNP        | 7        | 68.4       | scaffold174.0 | 373,420         |
| Pyb07_186      | SNP        | 7        | 68.6       | scaffold56.0  | 787,414         |
| Pyb07_188      | SNP        | 7        | 68.9       | scaffold174.0 | 555,659         |
| Pyb07_189      | SNP        | 7        | 69.2       | scaffold87.0  | 793,638         |
| Pyb07_193      | SNP        | 7        | 69.9       | scaffold87.0  | 757,350         |
| Pyb07_194      | SNP        | 7        | 70.2       | scaffold87.0  | 733,034         |
| Pyb07_195      | SNP        | 7        | 70.5       | scaffold87.0  | 773,372         |
| Pyb07_196      | SNP        | 7        | 70.8       | scaffold87.0  | 60,216          |
| Pyb07_197      | SNP        | 7        | 70.9       | scaffold87.0  | 498,086         |
| Pyb07_198      | SNP        | 7        | 71.0       | scaffold87.0  | 539,425         |
| Pyb07_199      | SNP        | 7        | 71.3       | scaffold87.0  | 748,717         |
| Pyb07_200      | SNP        | 7        | 71.6       | scaffold87.0  | 755,838         |
| Pyb07_201      | SNP        | 7        | 71.9       | scaffold87.0  | 797,614         |
| Pyb07_202      | SNP        | 7        | 72.1       | scaffold87.0  | 287,700         |
| Pyb07_203      | SNP        | 7        | 72.5       | scaffold87.0  | 320,823         |
| Pyb07_204      | SNP        | 7        | 73.1       | scaffold87.0  | 982,855         |
| Pyb08_001      | SNP        | 8        | 0.0        | scaffold238.0 | 189,025         |
| Pyb08_005      | SNP        | 8        | 0.8        | scaffold293.0 | 118,875         |
| Pyb08_007      | SNP        | 8        | 1.0        | scaffold416.0 | 204,762         |
| Pyb08_009      | SNP        | 8        | 1.5        | scaffold12.0  | 1,071,706       |
| Pyb08_011      | SNP        | 8        | 1.6        | scaffold416.0 | 108,732         |
| <b>CH01h10</b> | <b>SSR</b> | <b>8</b> | <b>2.0</b> | scaffold416.0 | 292,612-292,728 |
| Pyb08_018      | SNP        | 8        | 3.6        | scaffold238.0 | 315,210         |
| Pyb08_020      | SNP        | 8        | 8.8        | scaffold43.0  | 42,115          |
| Pyb08_023      | SNP        | 8        | 9.3        | scaffold12.0  | 1,493,202       |
| Pyb08_024      | SNP        | 8        | 9.3        | scaffold43.0  | 692,194         |
| Pyb08_026      | SNP        | 8        | 9.6        | scaffold55.0  | 765,527         |
| Pyb08_027      | SNP        | 8        | 9.6        | scaffold12.0  | 1,334,800       |
| Pyb08_028      | SNP        | 8        | 9.7        | scaffold12.0  | 1,560,911       |
| Pyb08_029      | SNP        | 8        | 9.7        | scaffold12.0  | 1,099,722       |
| Pybd08_001     | SNP        | 8        | 10.1       | scaffold577.0 | 32,804          |
| Pyb08_036      | SNP        | 8        | 10.5       | scaffold293.0 | 5,563           |
| Pyb08_037      | SNP        | 8        | 10.5       | scaffold293.0 | 35,256          |
| Pyb08_039      | SNP        | 8        | 10.5       | scaffold293.0 | 24,079          |
| Pyb08_042      | SNP        | 8        | 10.7       | scaffold293.0 | 28,394          |
| Pyb08_050      | SNP        | 8        | 11.5       | scaffold577.0 | 145,216         |

---

|            |     |   |      |                |           |
|------------|-----|---|------|----------------|-----------|
| Pyb08_052  | SNP | 8 | 11.6 | scaffold293.0  | 272,724   |
| Pyb08_053  | SNP | 8 | 11.6 | scaffold293.0  | 281,213   |
| Pyb08_056  | SNP | 8 | 11.9 | scaffold293.0  | 318,444   |
| Pyb08_058  | SNP | 8 | 12.0 | scaffold293.0  | 400,570   |
| Pyb08_059  | SNP | 8 | 12.0 | scaffold293.0  | 309,948   |
| Pyb08_060  | SNP | 8 | 12.0 | scaffold293.0  | 457,579   |
| Pyb08_064  | SNP | 8 | 12.6 | scaffold293.0  | 364,202   |
| Pyb08_068  | SNP | 8 | 13.8 | scaffold293.0  | 372,243   |
| Pyb08_074  | SNP | 8 | 17.9 | scaffold238.0  | 55,592    |
| Pyb08_076  | SNP | 8 | 18.1 | scaffold152.0  | 392,816   |
| Pyb08_077  | SNP | 8 | 18.6 | scaffold838.0  | 19,554    |
| Pyb08_079  | SNP | 8 | 19.1 | scaffold238.0  | 193,205   |
| Pyb08_082  | SNP | 8 | 19.3 | scaffold238.0  | 190,218   |
| Pyb08_083  | SNP | 8 | 19.3 | scaffold238.0  | 204,908   |
| Pyb08_086  | SNP | 8 | 19.8 | scaffold152.0  | 535,085   |
| Pyb08_090  | SNP | 8 | 20.9 | scaffold613.0  | 106,263   |
| Pyb08_091  | SNP | 8 | 20.9 | scaffold152.0  | 160,423   |
| Pyb08_092  | SNP | 8 | 20.9 | scaffold152.0  | 162,242   |
| Pyb08_093  | SNP | 8 | 21.0 | scaffold613.0  | 99,090    |
| Pyb08_094  | SNP | 8 | 21.0 | scaffold578.0  | 131,756   |
| Pyb08_095  | SNP | 8 | 21.1 | scaffold152.0  | 127,889   |
| Pyb08_098  | SNP | 8 | 21.7 | scaffold778.0  | 19,503    |
| Pybd08_002 | SNP | 8 | 22.2 | scaffold12.0   | 1,339,951 |
| Pybd08_003 | SNP | 8 | 26.9 | scaffold43.0   | 552,834   |
| Pybd08_005 | SNP | 8 | 31.4 | scaffold43.0   | 75,235    |
| Pyb08_104  | SNP | 8 | 32.4 | scaffold43.0   | 875,296   |
| Pybd08_006 | SNP | 8 | 32.6 | scaffold43.0   | 1,056,815 |
| Pybd08_007 | SNP | 8 | 33.6 | scaffold43.0   | 29,842    |
| Pyb08_106  | SNP | 8 | 34.0 | scaffold43.0   | 677,111   |
| Pyb08_112  | SNP | 8 | 34.8 | scaffold12.0   | 1,580,712 |
| Pyb08_115  | SNP | 8 | 34.9 | scaffold12.0   | 1,310,886 |
| Pyb08_116  | SNP | 8 | 34.9 | scaffold577.0  | 113,254   |
| Pyb08_118  | SNP | 8 | 35.2 | scaffold416.0  | 395,949   |
| Pyb08_120  | SNP | 8 | 35.3 | scaffold577.0  | 32,849    |
| Pyb08_121  | SNP | 8 | 35.4 | scaffold577.0  | 155,842   |
| Pyb08_122  | SNP | 8 | 35.4 | scaffold12.0   | 1,520,822 |
| Pyb08_123  | SNP | 8 | 35.4 | scaffold577.0  | 134,644   |
| Pyb08_124  | SNP | 8 | 35.5 | scaffold12.0   | 1,494,141 |
| Pyb08_125  | SNP | 8 | 35.5 | scaffold1049.0 | 84,119    |
| Pyb08_126  | SNP | 8 | 35.5 | scaffold12.0   | 1,177,550 |
| Pyb08_127  | SNP | 8 | 35.5 | scaffold416.0  | 128,845   |
| Pyb08_128  | SNP | 8 | 35.6 | scaffold43.0   | 927,433   |
| Pyb08_130  | SNP | 8 | 35.6 | scaffold577.0  | 127,037   |
| Pyb08_131  | SNP | 8 | 35.6 | scaffold43.0   | 1,156,498 |

---

|            |     |   |      |                |                 |
|------------|-----|---|------|----------------|-----------------|
| Pyb08_132  | SNP | 8 | 35.6 | scaffold43.0   | 756,967         |
| Pyb08_134  | SNP | 8 | 35.9 | scaffold43.0   | 1,166,996       |
| Pyb08_135  | SNP | 8 | 35.9 | scaffold43.0   | 842,667         |
| Pyb08_136  | SNP | 8 | 36.0 | scaffold43.0   | 855,769         |
| Pyb08_138  | SNP | 8 | 36.3 | scaffold43.0   | 887,061         |
| Pyb08_139  | SNP | 8 | 36.3 | scaffold43.0   | 889,314         |
| Pybd08_009 | SNP | 8 | 38.5 | scaffold43.0   | 272,006         |
| Pyb08_145  | SNP | 8 | 44.7 | scaffold238.0  | 54,117          |
| Pyb08_147  | SNP | 8 | 46.0 | scaffold238.0  | 351,116         |
| Pyb08_148  | SNP | 8 | 46.0 | scaffold152.0  | 443,123         |
| Pyb08_149  | SNP | 8 | 46.7 | scaffold838.0  | 125,098         |
| Pyb08_150  | SNP | 8 | 47.2 | scaffold613.0  | 81,425          |
| Pyb08_152  | SNP | 8 | 47.4 | scaffold778.0  | 2,845           |
| Pyb08_154  | SNP | 8 | 47.6 | scaffold778.0  | 19,455          |
| Pyb08_155  | SNP | 8 | 47.7 | scaffold613.0  | 135,847         |
| Pyb08_157  | SNP | 8 | 49.1 | scaffold1118.0 | 106,936         |
| Pyb08_159  | SNP | 8 | 49.7 | scaffold1118.0 | 89,994          |
| Pyb08_164  | SNP | 8 | 51.6 | scaffold68.0   | 213,403         |
| Pyb08_165  | SNP | 8 | 51.8 | scaffold99.0   | 361,121         |
| Pyb08_171  | SNP | 8 | 52.0 | scaffold99.0   | 508,390         |
| Pyb08_177  | SNP | 8 | 52.3 | scaffold99.0   | 420,710         |
| Pyb08_178  | SNP | 8 | 52.4 | scaffold99.0   | 361,185         |
| Pyb08_179  | SNP | 8 | 52.5 | scaffold99.0   | 14,043          |
| Pyb08_181  | SNP | 8 | 53.1 | scaffold99.0   | 420,670         |
| Pybd08_011 | SNP | 8 | 53.8 | scaffold99.0   | 87,367          |
| Pyb08_185  | SNP | 8 | 54.3 | scaffold99.0   | 199,405         |
| Pyb08_187  | SNP | 8 | 57.0 | scaffold304.0  | 376,634         |
| Pyb08_203  | SNP | 8 | 60.4 | scaffold318.0  | 214,677         |
| Pyb08_204  | SNP | 8 | 60.4 | scaffold318.0  | 216,692         |
| Pybd08_012 | SNP | 8 | 60.5 | scaffold227.0  | 231,894         |
| Pyb08_216  | SNP | 8 | 64.3 | scaffold502.0  | 35,446          |
| CH05a02    | SSR | 8 | 64.5 | scaffold502.0  | 124,284-124,014 |
| Pyb08_218  | SNP | 8 | 64.6 | scaffold502.0  | 19,103          |
| Pyb08_219  | SNP | 8 | 64.6 | scaffold27.0   | 1,275,963       |
| Hi20b03    | SSR | 8 | 64.7 | scaffold816.0  | 46,823-47,049   |
| Pyb08_220  | SNP | 8 | 64.7 | scaffold502.0  | 35,387          |
| Pyb08_221  | SNP | 8 | 64.9 | scaffold502.0  | 58,646          |
| Pybd08_015 | SNP | 8 | 67.5 | scaffold816.0  | 153,536         |
| Pyd08_004  | SNP | 8 | 69.0 | scaffold502.0  | 237,213         |
| Pyb08_225  | SNP | 8 | 71.7 | scaffold190.0  | 383,332         |
| Pybd08_016 | SNP | 8 | 74.3 | scaffold887.0  | 1,942           |
| Pybd08_017 | SNP | 8 | 76.0 | scaffold1304.0 | 64,603          |
| Pyd08_011  | SNP | 8 | 78.6 | scaffold190.0  | 386,928         |
| Pyb08_233  | SNP | 8 | 81.9 | scaffold887.0  | 72,534          |

|               |            |          |              |                      |                      |
|---------------|------------|----------|--------------|----------------------|----------------------|
| Pyb08_245     | SNP        | 8        | 85.7         | scaffold33.0         | 722,729              |
| Pyb08_248     | SNP        | 8        | 85.9         | scaffold33.0         | 600,236              |
| Pyb08_252     | SNP        | 8        | 86.5         | scaffold398.0        | 100,585              |
| Pyb08_254     | SNP        | 8        | 86.6         | scaffold49.2         | 94,935               |
| Pyb08_257     | SNP        | 8        | 86.9         | scaffold33.0         | 603,233              |
| Pyb08_258     | SNP        | 8        | 87.0         | scaffold398.0        | 344,963              |
| Pybd08_021    | SNP        | 8        | 87.0         | scaffold398.0        | 415,954              |
| Pyb08_260     | SNP        | 8        | 87.0         | scaffold269.0        | 462,999              |
| Pyb08_264     | SNP        | 8        | 87.2         | scaffold269.0        | 530,503              |
| Pyb08_265     | SNP        | 8        | 87.2         | scaffold49.2         | 286,913              |
| Pyb08_266     | SNP        | 8        | 87.3         | scaffold49.2         | 298,996              |
| Pyb08_267     | SNP        | 8        | 87.4         | scaffold49.2         | 43,129               |
| Pyb08_268     | SNP        | 8        | 87.4         | scaffold49.2         | 303,544              |
| Pyb08_270     | SNP        | 8        | 87.6         | scaffold398.0        | 66,078               |
| Pyb08_272     | SNP        | 8        | 87.7         | scaffold398.0        | 134,924              |
| Pyb08_273     | SNP        | 8        | 87.7         | scaffold398.0        | 406,168              |
| Pyb08_275     | SNP        | 8        | 87.9         | scaffold398.0        | 74,861               |
| Pyb08_276     | SNP        | 8        | 87.9         | scaffold398.0        | 134,279              |
| Pyb08_277     | SNP        | 8        | 88.0         | scaffold398.0        | 387,156              |
| Pyb08_279     | SNP        | 8        | 88.3         | scaffold33.0         | 600,248              |
| Pyb08_285     | SNP        | 8        | 89.2         | scaffold190.0        | 386,897              |
| Pybd08_023    | SNP        | 8        | 95.3         | scaffold131.0        | 391,386              |
| Pybd08_024    | SNP        | 8        | 100.2        | scaffold131.0        | 708,811              |
| Pyb08_311     | SNP        | 8        | 100.6        | scaffold464.0        | 39,473               |
| <b>NH036b</b> | <b>SSR</b> | <b>8</b> | <b>100.8</b> | <b>scaffold464.0</b> | <b>21,703-21,980</b> |
| Pyb08_320     | SNP        | 8        | 101.6        | scaffold464.0        | 263,429              |
| Pyb08_321     | SNP        | 8        | 101.6        | scaffold464.0        | 74,977               |
| Pyb08_322     | SNP        | 8        | 101.7        | scaffold464.0        | 87,576               |
| Pyb08_323     | SNP        | 8        | 101.8        | scaffold464.0        | 117,033              |
| Pyb08_324     | SNP        | 8        | 102.0        | scaffold464.0        | 87,536               |
| Pyb08_325     | SNP        | 8        | 102.2        | scaffold464.0        | 95,544               |
| Pyb08_328     | SNP        | 8        | 103.3        | scaffold72.0         | 197,085              |
| Pyd08_017     | SNP        | 8        | 103.4        | scaffold72.0         | 111,016              |
| Pyb08_329     | SNP        | 8        | 103.6        | scaffold288.2        | 19,070               |
| Pyb08_330     | SNP        | 8        | 103.6        | scaffold288.2        | 7,308                |
| Pybd08_025    | SNP        | 8        | 104.0        | scaffold288.2        | 30,414               |
| Pyb08_335     | SNP        | 8        | 104.1        | scaffold131.0        | 46,617               |
| Pyb08_336     | SNP        | 8        | 104.2        | scaffold131.0        | 658,769              |
| Pyb08_337     | SNP        | 8        | 104.2        | scaffold131.0        | 377,773              |
| Pybd08_026    | SNP        | 8        | 104.2        | scaffold131.0        | 580,398              |
| Pyb08_341     | SNP        | 8        | 104.3        | scaffold131.0        | 374,874              |
| Pyb08_345     | SNP        | 8        | 104.4        | scaffold131.0        | 351,701              |
| Pyb08_346     | SNP        | 8        | 104.4        | scaffold131.0        | 492,247              |
| Pyb08_350     | SNP        | 8        | 104.5        | scaffold131.0        | 320,168              |



|            |     |   |       |                |                 |
|------------|-----|---|-------|----------------|-----------------|
| Pyb08_353  | SNP | 8 | 104.5 | scaffold131.0  | 108,750         |
| Pyb08_361  | SNP | 8 | 104.7 | scaffold131.0  | 590,822         |
| Pyb08_365  | SNP | 8 | 105.3 | scaffold72.0   | 40,067          |
| Pyb08_366  | SNP | 8 | 105.3 | scaffold72.0   | 550,356         |
| Pyb08_367  | SNP | 8 | 105.3 | scaffold131.0  | 755,432         |
| Pyb08_368  | SNP | 8 | 105.4 | scaffold131.0  | 743,940         |
| Pyb08_370  | SNP | 8 | 105.5 | scaffold288.1  | 74,214          |
| Pyb08_371  | SNP | 8 | 105.5 | scaffold72.0   | 660,399         |
| Pyb08_373  | SNP | 8 | 105.5 | scaffold131.0  | 761,264         |
| Pyb08_374  | SNP | 8 | 105.9 | scaffold72.0   | 578,201         |
| Pyb08_376  | SNP | 8 | 106.2 | scaffold72.0   | 558,684         |
| Pyd08_021  | SNP | 8 | 106.7 | scaffold49.2   | 175,088         |
| Pyd08_022  | SNP | 8 | 106.8 | scaffold49.2   | 63,863          |
| Pybd08_027 | SNP | 8 | 108.3 | scaffold398.0  | 240,651         |
| Pybd08_028 | SNP | 8 | 117.7 | scaffold72.0   | 755,448         |
| Pyb09_001  | SNP | 9 | 0.0   | scaffold618.0  | 264,570         |
| Pyb09_003  | SNP | 9 | 0.1   | scaffold618.0  | 85,614          |
| Pyb09_004  | SNP | 9 | 0.2   | scaffold151.0  | 511,675         |
| Pyb09_007  | SNP | 9 | 0.6   | scaffold105.0  | 850,825         |
| Pyb09_009  | SNP | 9 | 0.6   | scaffold105.0  | 854,018         |
| Pyb09_010  | SNP | 9 | 1.0   | scaffold105.0  | 659,994         |
| Pyb09_011  | SNP | 9 | 1.2   | scaffold151.0  | 623,223         |
| Pyb09_012  | SNP | 9 | 1.5   | scaffold105.0  | 257,965         |
| Pyb09_013  | SNP | 9 | 1.5   | scaffold151.0  | 674,917         |
| Pyb09_014  | SNP | 9 | 2.5   | scaffold59.0   | 171,517         |
| Pyb09_015  | SNP | 9 | 2.5   | scaffold246.0  | 366,409         |
| Pyb09_016  | SNP | 9 | 2.7   | scaffold246.0  | 459,199         |
| Pyb09_017  | SNP | 9 | 3.2   | scaffold59.0   | 176,973         |
| Pyb09_018  | SNP | 9 | 3.2   | scaffold59.0   | 178,566         |
| CO898678   | SSR | 9 | 3.6   | scaffold59.0   | 135,823-136,059 |
| Pyb09_023  | SNP | 9 | 4.2   | scaffold59.0   | 338,210         |
| Pyb09_024  | SNP | 9 | 4.3   | scaffold59.0   | 326,492         |
| Pyb09_027  | SNP | 9 | 8.1   | scaffold55.0   | 194,432         |
| Pyb09_028  | SNP | 9 | 8.9   | scaffold55.0   | 450,725         |
| Pyb09_029  | SNP | 9 | 9.3   | scaffold725.0  | 30,999          |
| Pyb09_032  | SNP | 9 | 10.6  | scaffold127.0  | 665,118         |
| Pyb09_034  | SNP | 9 | 11.0  | scaffold1120.0 | 6,218           |
| Pyb09_037  | SNP | 9 | 11.3  | scaffold1342.0 | 45,426          |
| Pyb09_039  | SNP | 9 | 11.5  | scaffold397.0  | 114,393         |
| Pyb09_043  | SNP | 9 | 11.7  | scaffold368.0  | 95,263          |
| Pyb09_046  | SNP | 9 | 11.9  | scaffold1039.0 | 25,543          |
| Pyb09_050  | SNP | 9 | 12.4  | scaffold127.0  | 484,409         |
| Pyb09_051  | SNP | 9 | 12.4  | scaffold1039.0 | 19,797          |
| Pyb09_053  | SNP | 9 | 12.5  | scaffold127.0  | 206,326         |

|                |            |          |      |               |                 |
|----------------|------------|----------|------|---------------|-----------------|
| <b>CH05a03</b> | <b>SSR</b> | <b>9</b> | 12.6 | scaffold127.0 | 644,703-644,906 |
| Pyb09_057      | SNP        | 9        | 12.7 | scaffold127.0 | 10,837          |
| Pyb09_058      | SNP        | 9        | 12.8 | scaffold397.0 | 49,063          |
| Pyb09_061      | SNP        | 9        | 13.4 | scaffold55.0  | 495,352         |
| Pyb09_062      | SNP        | 9        | 13.8 | scaffold55.0  | 208,115         |
| Pyd09_002      | SNP        | 9        | 20.7 | scaffold618.0 | 145,652         |
| Pyd09_009      | SNP        | 9        | 26.1 | scaffold246.0 | 436,847         |
| Pyd09_012      | SNP        | 9        | 28.9 | scaffold213.0 | 483,043         |
| Pyd09_015      | SNP        | 9        | 33.5 | scaffold29.0  | 301,979         |
| Pyd09_017      | SNP        | 9        | 33.9 | scaffold29.0  | 446,294         |
| Pyd09_022      | SNP        | 9        | 37.3 | scaffold225.0 | 185,059         |
| Pybd09_002     | SNP        | 9        | 42.6 | scaffold354.0 | 342,431         |
| Pyd09_025      | SNP        | 9        | 42.7 | scaffold486.0 | 134,677         |
| Pyd09_026      | SNP        | 9        | 42.8 | scaffold486.0 | 136,368         |
| Pyd09_028      | SNP        | 9        | 42.9 | scaffold486.0 | 179,108         |
| <b>NB106a</b>  | <b>SSR</b> | <b>9</b> | 43.1 | scaffold486.0 | 271,706-271,825 |
| Pyb09_068      | SNP        | 9        | 43.2 | scaffold50.0  | 168,538         |
| Pybd09_003     | SNP        | 9        | 43.4 | scaffold375.0 | 348,658         |
| Pyd09_029      | SNP        | 9        | 43.5 | scaffold354.0 | 405,158         |
| Pyd09_030      | SNP        | 9        | 43.5 | scaffold354.0 | 273,184         |
| Pybd09_004     | SNP        | 9        | 44.6 | scaffold375.0 | 330,579         |
| Pyb09_070      | SNP        | 9        | 46.0 | scaffold29.0  | 605,721         |
| Pyd09_033      | SNP        | 9        | 46.1 | scaffold375.0 | 337,116         |
| Pyb09_071      | SNP        | 9        | 46.2 | scaffold128.0 | 293,658         |
| Pyb09_074      | SNP        | 9        | 46.4 | scaffold29.0  | 602,919         |
| Pyb09_075      | SNP        | 9        | 46.5 | scaffold29.0  | 678,398         |
| Pyd09_036      | SNP        | 9        | 46.6 | scaffold50.0  | 895,515         |
| Pyb09_078      | SNP        | 9        | 46.9 | scaffold657.0 | 122,061         |
| Pyb09_089      | SNP        | 9        | 48.7 | scaffold225.0 | 589,076         |
| Pyb09_093      | SNP        | 9        | 49.1 | scaffold225.0 | 92,205          |
| Pyb09_096      | SNP        | 9        | 49.3 | scaffold225.0 | 234,198         |
| Pyb09_098      | SNP        | 9        | 49.3 | scaffold155.0 | 402,959         |
| Pyb09_100      | SNP        | 9        | 49.6 | scaffold486.0 | 152,335         |
| Pyb09_102      | SNP        | 9        | 49.7 | scaffold486.0 | 293,414         |
| Pyb09_104      | SNP        | 9        | 49.8 | scaffold273.0 | 60,427          |
| Pyb09_105      | SNP        | 9        | 49.8 | scaffold225.0 | 8,331           |
| Pyb09_109      | SNP        | 9        | 50.3 | scaffold225.0 | 106,058         |
| Pyb09_111      | SNP        | 9        | 50.6 | scaffold452.0 | 277,933         |
| Pyb09_112      | SNP        | 9        | 50.6 | scaffold486.0 | 169,365         |
| Pyb09_115      | SNP        | 9        | 50.7 | scaffold273.0 | 92,990          |
| Pyb09_116      | SNP        | 9        | 50.7 | scaffold452.0 | 180,419         |
| Pyb09_120      | SNP        | 9        | 53.2 | scaffold50.0  | 447,853         |
| Pyb09_125      | SNP        | 9        | 56.2 | scaffold29.0  | 1,202,639       |
| Pyb09_126      | SNP        | 9        | 56.3 | scaffold29.0  | 941,534         |

|            |     |   |      |                |                 |
|------------|-----|---|------|----------------|-----------------|
| Pyb09_127  | SNP | 9 | 56.4 | scaffold29.0   | 1,240,523       |
| Pyb09_129  | SNP | 9 | 57.4 | scaffold65.0   | 576,696         |
| Pyb09_132  | SNP | 9 | 59.8 | scaffold704.0  | 197,548         |
| Pyb09_134  | SNP | 9 | 59.8 | scaffold93.0   | 850,065         |
| Hi04a05    | SSR | 9 | 60.0 | scaffold704.0  | 196,872-197,099 |
| Pybd09_005 | SNP | 9 | 61.3 | scaffold375.0  | 239,877         |
| Pyb09_137  | SNP | 9 | 62.5 | scaffold375.0  | 342,303         |
| Pyb09_138  | SNP | 9 | 62.6 | scaffold50.0   | 828,755         |
| KA20       | SSR | 9 | 62.9 | scaffold1284.0 | 43,035-43,497   |
| Pybd09_007 | SNP | 9 | 63.1 | scaffold50.0   | 674,621         |
| Pyb09_140  | SNP | 9 | 63.3 | scaffold354.0  | 387,634         |
| Pyb09_144  | SNP | 9 | 63.3 | scaffold1284.0 | 11,347          |
| Pyb09_148  | SNP | 9 | 63.4 | scaffold354.0  | 309,830         |
| Pyb09_150  | SNP | 9 | 63.4 | scaffold1284.0 | 32,679          |
| Pyb09_151  | SNP | 9 | 63.4 | scaffold50.0   | 679,259         |
| Pyb09_153  | SNP | 9 | 63.7 | scaffold50.0   | 612,458         |
| Pyb09_154  | SNP | 9 | 63.7 | scaffold50.0   | 507,856         |
| Pyb09_156  | SNP | 9 | 63.7 | scaffold50.0   | 503,245         |
| Pyb09_158  | SNP | 9 | 63.7 | scaffold50.0   | 570,465         |
| Pyd09_038  | SNP | 9 | 64.0 | scaffold50.0   | 519,245         |
| Pyd09_039  | SNP | 9 | 64.0 | scaffold50.0   | 541,439         |
| Pyd09_041  | SNP | 9 | 64.0 | scaffold50.0   | 847,955         |
| Pyd09_043  | SNP | 9 | 64.0 | scaffold375.0  | 363,147         |
| Pyd09_044  | SNP | 9 | 64.2 | scaffold375.0  | 319,857         |
| Pyd09_045  | SNP | 9 | 64.5 | scaffold354.0  | 449,632         |
| Pyd09_046  | SNP | 9 | 64.5 | scaffold375.0  | 241,742         |
| Pyd09_047  | SNP | 9 | 64.5 | scaffold375.0  | 379,430         |
| Pyd09_048  | SNP | 9 | 64.5 | scaffold375.0  | 430,074         |
| Pyb09_162  | SNP | 9 | 64.6 | scaffold126.0  | 692,052         |
| Pyb09_168  | SNP | 9 | 67.9 | scaffold27.0   | 486,066         |
| Pyb09_171  | SNP | 9 | 68.3 | scaffold126.0  | 661,083         |
| Pyb09_173  | SNP | 9 | 68.3 | scaffold27.0   | 670,192         |
| Pyb09_174  | SNP | 9 | 68.3 | scaffold126.0  | 711,095         |
| Pyb09_175  | SNP | 9 | 68.3 | scaffold27.0   | 729,195         |
| Pyb09_177  | SNP | 9 | 68.4 | scaffold27.0   | 738,158         |
| Pyb09_184  | SNP | 9 | 68.5 | scaffold27.0   | 659,900         |
| Pyd09_057  | SNP | 9 | 69.9 | scaffold126.0  | 710,701         |
| Pyd09_059  | SNP | 9 | 69.9 | scaffold126.0  | 601,536         |
| Pyd09_066  | SNP | 9 | 74.8 | scaffold954.0  | 124,249         |
| Pyd09_069  | SNP | 9 | 75.0 | scaffold954.0  | 131,910         |
| Pyd09_070  | SNP | 9 | 75.2 | scaffold27.0   | 710,460         |
| Pyd09_072  | SNP | 9 | 75.7 | scaffold27.0   | 502,551         |
| Pyb09_187  | SNP | 9 | 76.9 | scaffold266.0  | 513,647         |
| Pyb09_191  | SNP | 9 | 77.5 | scaffold266.0  | 512,860         |

---

|            |     |   |       |                |           |
|------------|-----|---|-------|----------------|-----------|
| Pyb09_192  | SNP | 9 | 77.5  | scaffold50.0   | 123,721   |
| Pyb09_195  | SNP | 9 | 78.4  | scaffold126.0  | 611,029   |
| Pyb09_201  | SNP | 9 | 79.4  | scaffold133.0  | 134,538   |
| Pyb09_202  | SNP | 9 | 79.5  | scaffold53.0   | 601,646   |
| Pyb09_203  | SNP | 9 | 79.7  | scaffold53.0   | 581,167   |
| Pyb09_207  | SNP | 9 | 79.8  | scaffold80.0   | 258,038   |
| Pyb09_208  | SNP | 9 | 79.8  | scaffold53.0   | 545,582   |
| Pyb09_209  | SNP | 9 | 79.8  | scaffold53.0   | 488,822   |
| Pyb09_211  | SNP | 9 | 79.9  | scaffold334.0  | 157,297   |
| Pyb09_212  | SNP | 9 | 79.9  | scaffold334.0  | 278,510   |
| Pyb09_216  | SNP | 9 | 80.4  | scaffold53.0   | 794,008   |
| Pyb09_217  | SNP | 9 | 80.4  | scaffold53.0   | 822,536   |
| Pyb09_223  | SNP | 9 | 81.0  | scaffold53.0   | 947,632   |
| Pyb09_224  | SNP | 9 | 81.0  | scaffold53.0   | 1,022,440 |
| Pyb09_225  | SNP | 9 | 81.0  | scaffold27.0   | 81,345    |
| Pyb09_228  | SNP | 9 | 81.4  | scaffold27.0   | 180,222   |
| Pyb09_235  | SNP | 9 | 82.6  | scaffold1220.0 | 79,778    |
| Pyb09_236  | SNP | 9 | 82.8  | scaffold27.0   | 767,602   |
| Pyb09_237  | SNP | 9 | 83.1  | scaffold126.0  | 314,846   |
| Pyb09_240  | SNP | 9 | 83.8  | scaffold685.0  | 214,374   |
| Pyd09_074  | SNP | 9 | 91.0  | scaffold422.0  | 94,797    |
| Pybd09_011 | SNP | 9 | 101.6 | scaffold382.0  | 326,381   |
| Pyb09_254  | SNP | 9 | 109.1 | scaffold422.0  | 94,778    |
| Pyb09_255  | SNP | 9 | 109.3 | scaffold817.0  | 162,203   |
| Pyb09_256  | SNP | 9 | 109.4 | scaffold382.0  | 313,979   |
| Pyb09_257  | SNP | 9 | 109.5 | scaffold382.0  | 350,105   |
| Pybd09_014 | SNP | 9 | 109.7 | scaffold382.0  | 206,156   |
| Pyb09_267  | SNP | 9 | 110.5 | scaffold817.0  | 159,858   |
| Pyb09_268  | SNP | 9 | 110.6 | scaffold940.0  | 7,605     |
| Pyb09_269  | SNP | 9 | 110.6 | scaffold940.0  | 100,283   |
| Pyb09_272  | SNP | 9 | 110.8 | scaffold292.0  | 189,524   |
| Pyb09_274  | SNP | 9 | 111.0 | scaffold382.0  | 88,034    |
| Pyb09_275  | SNP | 9 | 111.1 | scaffold677.0  | 29,644    |
| Pyb09_280  | SNP | 9 | 111.3 | scaffold940.0  | 4,843     |
| Pyb09_281  | SNP | 9 | 111.3 | scaffold940.0  | 42,727    |
| Pyb09_283  | SNP | 9 | 111.3 | scaffold940.0  | 67,736    |
| Pyb09_286  | SNP | 9 | 111.3 | scaffold940.0  | 52,859    |
| Pyb09_288  | SNP | 9 | 111.4 | scaffold70.0   | 460,389   |
| Pyb09_291  | SNP | 9 | 111.7 | scaffold940.0  | 52,845    |
| Pyb09_292  | SNP | 9 | 111.7 | scaffold422.0  | 49,553    |
| Pyb09_299  | SNP | 9 | 111.8 | scaffold382.0  | 256,941   |
| Pyb09_300  | SNP | 9 | 111.8 | scaffold292.0  | 204,980   |
| Pyb09_301  | SNP | 9 | 112.0 | scaffold940.0  | 87,867    |
| Pyb09_302  | SNP | 9 | 112.0 | scaffold817.0  | 13,366    |

---

---

|            |     |    |       |                |         |
|------------|-----|----|-------|----------------|---------|
| Pyb09_304  | SNP | 9  | 112.2 | scaffold382.0  | 289,107 |
| Pyb09_306  | SNP | 9  | 112.6 | scaffold817.0  | 94,528  |
| Pyb09_307  | SNP | 9  | 112.6 | scaffold214.0  | 72,716  |
| Pyb09_308  | SNP | 9  | 112.9 | scaffold817.0  | 162,266 |
| Pyb09_309  | SNP | 9  | 113.2 | scaffold292.0  | 169,954 |
| Pyb09_310  | SNP | 9  | 113.3 | scaffold292.0  | 144,885 |
| Pyb09_311  | SNP | 9  | 113.4 | scaffold292.0  | 15,044  |
| Pyb09_314  | SNP | 9  | 114.7 | scaffold53.0   | 476,743 |
| Pyb09_315  | SNP | 9  | 114.8 | scaffold133.0  | 75,019  |
| Pyb09_318  | SNP | 9  | 115.0 | scaffold334.0  | 190,025 |
| Pyb09_319  | SNP | 9  | 115.1 | scaffold334.0  | 169,748 |
| Pyd09_085  | SNP | 9  | 115.7 | scaffold50.0   | 149,371 |
| Pyb09_323  | SNP | 9  | 115.9 | scaffold53.0   | 881,848 |
| Pyb09_325  | SNP | 9  | 116.6 | scaffold27.0   | 79,144  |
| Pyb09_326  | SNP | 9  | 116.7 | scaffold53.0   | 640,132 |
| Pyb09_328  | SNP | 9  | 119.0 | scaffold53.0   | 635,286 |
| Pybd10_001 | SNP | 10 | 0.0   | scaffold568.0  | 130,242 |
| Pyb10_001  | SNP | 10 | 1.9   | scaffold169.0  | 350,245 |
| Pyb10_003  | SNP | 10 | 2.0   | scaffold1206.0 | 16,412  |
| Pyb10_005  | SNP | 10 | 2.3   | scaffold1302.0 | 47,373  |
| Pyb10_012  | SNP | 10 | 3.0   | scaffold169.0  | 292,597 |
| Pyb10_013  | SNP | 10 | 3.1   | scaffold169.0  | 344,150 |
| Pyb10_014  | SNP | 10 | 3.1   | scaffold169.0  | 149,078 |
| Pyb10_015  | SNP | 10 | 3.1   | scaffold169.0  | 376,189 |
| Pyb10_016  | SNP | 10 | 3.1   | scaffold32.0   | 930,312 |
| Pyb10_017  | SNP | 10 | 3.1   | scaffold169.0  | 400,280 |
| Pyb10_020  | SNP | 10 | 3.5   | scaffold552.0  | 208,133 |
| Pyb10_022  | SNP | 10 | 5.0   | scaffold1036.0 | 2,195   |
| Pyb10_023  | SNP | 10 | 5.2   | scaffold32.0   | 915,693 |
| Pyb10_024  | SNP | 10 | 5.2   | scaffold32.0   | 520,197 |
| Pyb10_026  | SNP | 10 | 5.3   | scaffold32.0   | 546,661 |
| Pyb10_027  | SNP | 10 | 5.3   | scaffold32.0   | 802,948 |
| Pyb10_032  | SNP | 10 | 6.3   | scaffold32.0   | 382,088 |
| Pyb10_033  | SNP | 10 | 6.3   | scaffold32.0   | 429,298 |
| Pyb10_034  | SNP | 10 | 6.7   | scaffold32.0   | 301,164 |
| Pyb10_037  | SNP | 10 | 6.9   | scaffold32.0   | 338,898 |
| Pyb10_038  | SNP | 10 | 7.0   | scaffold32.0   | 273,417 |
| Pyb10_039  | SNP | 10 | 7.0   | scaffold32.0   | 201,257 |
| Pyb10_042  | SNP | 10 | 7.3   | scaffold32.0   | 280,676 |
| Pyb10_044  | SNP | 10 | 7.7   | scaffold32.0   | 225,891 |
| Pyb10_045  | SNP | 10 | 7.8   | scaffold32.0   | 259,150 |
| Pyb10_046  | SNP | 10 | 7.9   | scaffold32.0   | 198,542 |
| Pyb10_049  | SNP | 10 | 10.1  | scaffold761.0  | 79,842  |
| Pyb10_051  | SNP | 10 | 10.8  | scaffold761.0  | 147,583 |

---

|                 |            |           |      |                |                 |
|-----------------|------------|-----------|------|----------------|-----------------|
| Pyb10_054       | SNP        | 10        | 12.3 | scaffold85.0   | 478,191         |
| Pyb10_057       | SNP        | 10        | 12.5 | scaffold85.0   | 683,062         |
| Pyb10_060       | SNP        | 10        | 12.8 | scaffold24.0   | 218,340         |
| Pyb10_061       | SNP        | 10        | 12.8 | scaffold24.0   | 161,304         |
| Pyb10_063       | SNP        | 10        | 12.9 | scaffold85.0   | 633,231         |
| Pyb10_064       | SNP        | 10        | 12.9 | scaffold24.0   | 133,362         |
| Pyb10_065       | SNP        | 10        | 12.9 | scaffold314.0  | 16,550          |
| Pyb10_069       | SNP        | 10        | 12.9 | scaffold85.0   | 845,750         |
| Pyb10_070       | SNP        | 10        | 13.0 | scaffold24.0   | 49,908          |
| Pybd10_002      | SNP        | 10        | 13.1 | scaffold24.0   | 308,527         |
| Pybd10_003      | SNP        | 10        | 13.2 | scaffold24.0   | 315,098         |
| Pyb10_072       | SNP        | 10        | 13.7 | scaffold24.0   | 298,594         |
| Pyb10_073       | SNP        | 10        | 13.7 | scaffold24.0   | 431,646         |
| Pyb10_074       | SNP        | 10        | 13.7 | scaffold24.0   | 1,229,453       |
| Pyb10_075       | SNP        | 10        | 13.7 | scaffold24.0   | 969,949         |
| Pyb10_076       | SNP        | 10        | 13.7 | scaffold24.0   | 423,813         |
| <b>CH02b03b</b> | <b>SSR</b> | <b>10</b> | 13.9 | scaffold24.0   | 497232-497087   |
| Pyb10_078       | SNP        | 10        | 13.9 | scaffold24.0   | 957,437         |
| Pyb10_079       | SNP        | 10        | 13.9 | scaffold24.0   | 1,152,794       |
| Pyb10_081       | SNP        | 10        | 14.0 | scaffold24.0   | 662,513         |
| Pyb10_082       | SNP        | 10        | 14.0 | scaffold24.0   | 1,106,996       |
| Pyb10_083       | SNP        | 10        | 14.0 | scaffold24.0   | 1,400,484       |
| Pyb10_087       | SNP        | 10        | 14.1 | scaffold85.0   | 434,765         |
| Pyb10_090       | SNP        | 10        | 14.3 | scaffold24.0   | 640,476         |
| Pyb10_100       | SNP        | 10        | 14.8 | scaffold1039.0 | 112,473         |
| Pyb10_105       | SNP        | 10        | 14.9 | scaffold1039.0 | 118,634         |
| Pyb10_112       | SNP        | 10        | 15.3 | scaffold24.0   | 949,175         |
| Pyb10_114       | SNP        | 10        | 15.4 | scaffold24.0   | 1,030,058       |
| Pyb10_117       | SNP        | 10        | 15.5 | scaffold24.0   | 898,805         |
| Pyb10_125       | SNP        | 10        | 16.6 | scaffold57.0   | 1,157,119       |
| Pyb10_127       | SNP        | 10        | 16.7 | scaffold57.0   | 340,575         |
| <b>MS06g03</b>  | <b>SSR</b> | <b>10</b> | 16.9 | scaffold57.0   | 882,928-883,157 |
| Pyb10_128       | SNP        | 10        | 17.3 | scaffold261.0  | 3,319           |
| Pyb10_129       | SNP        | 10        | 18.0 | scaffold261.0  | 351,082         |
| Pyd10_004       | SNP        | 10        | 28.1 | scaffold169.0  | 149,011         |
| Pyd10_011       | SNP        | 10        | 29.9 | scaffold810.0  | 103,052         |
| Pyb10_133       | SNP        | 10        | 30.1 | scaffold24.0   | 261,104         |
| Pyb10_134       | SNP        | 10        | 30.5 | scaffold57.0   | 1,013,202       |
| Pybd10_004      | SNP        | 10        | 31.6 | scaffold57.0   | 580,646         |
| Pyb10_139       | SNP        | 10        | 35.5 | scaffold261.0  | 177,004         |
| Pyb10_140       | SNP        | 10        | 35.5 | scaffold57.0   | 767,650         |
| Pyb10_141       | SNP        | 10        | 35.7 | scaffold261.0  | 107,714         |
| Pyb10_142       | SNP        | 10        | 36.1 | scaffold24.0   | 922,242         |
| Pyb10_143       | SNP        | 10        | 36.2 | scaffold24.0   | 429,669         |

|                |            |           |      |                |                 |
|----------------|------------|-----------|------|----------------|-----------------|
| Pyb10_144      | SNP        | 10        | 36.4 | scaffold57.0   | 587,420         |
| Pyb10_145      | SNP        | 10        | 36.4 | scaffold261.0  | 37,959          |
| Pyb10_146      | SNP        | 10        | 36.4 | scaffold57.0   | 518,689         |
| Pyd10_017      | SNP        | 10        | 36.9 | scaffold24.0   | 431,630         |
| Pyb10_152      | SNP        | 10        | 37.2 | scaffold24.0   | 1,032,168       |
| Pyb10_154      | SNP        | 10        | 37.2 | scaffold24.0   | 408,674         |
| Pyb10_156      | SNP        | 10        | 37.2 | scaffold24.0   | 1,164,381       |
| Pyb10_157      | SNP        | 10        | 37.2 | scaffold24.0   | 959,884         |
| Pyb10_160      | SNP        | 10        | 37.4 | scaffold24.0   | 787,261         |
| Pyb10_163      | SNP        | 10        | 37.8 | scaffold85.0   | 90,993          |
| Pyb10_164      | SNP        | 10        | 37.8 | scaffold85.0   | 551,502         |
| Pyb10_165      | SNP        | 10        | 37.8 | scaffold85.0   | 586,003         |
| Pyb10_166      | SNP        | 10        | 37.8 | scaffold85.0   | 810,123         |
| Pyb10_167      | SNP        | 10        | 37.8 | scaffold24.0   | 69,811          |
| Pyb10_169      | SNP        | 10        | 37.9 | scaffold85.0   | 962,328         |
| Pyb10_170      | SNP        | 10        | 37.9 | scaffold85.0   | 517,869         |
| Pyb10_172      | SNP        | 10        | 37.9 | scaffold85.0   | 741,296         |
| Pyb10_173      | SNP        | 10        | 38.0 | scaffold85.0   | 774,382         |
| Pyb10_174      | SNP        | 10        | 38.0 | scaffold85.0   | 651,994         |
| Pyb10_175      | SNP        | 10        | 38.0 | scaffold85.0   | 517,936         |
| Pyb10_177      | SNP        | 10        | 38.2 | scaffold85.0   | 805,236         |
| Pyb10_183      | SNP        | 10        | 39.1 | scaffold57.0   | 625,725         |
| Pyb10_185      | SNP        | 10        | 39.1 | scaffold57.0   | 1,036,318       |
| Pyb10_186      | SNP        | 10        | 39.1 | scaffold57.0   | 612,911         |
| Pyb10_187      | SNP        | 10        | 39.2 | scaffold261.0  | 43,704          |
| Pyb10_188      | SNP        | 10        | 39.2 | scaffold57.0   | 819,766         |
| Pyb10_189      | SNP        | 10        | 39.2 | scaffold57.0   | 553,370         |
| Pyb10_190      | SNP        | 10        | 39.2 | scaffold261.0  | 326,352         |
| Pyb10_193      | SNP        | 10        | 39.3 | scaffold261.0  | 13,320          |
| Pyb10_199      | SNP        | 10        | 39.7 | scaffold261.0  | 357,846         |
| Pyb10_200      | SNP        | 10        | 39.8 | scaffold57.0   | 553,323         |
| Pyb10_202      | SNP        | 10        | 39.9 | scaffold261.0  | 63,764          |
| Pyb10_203      | SNP        | 10        | 39.9 | scaffold261.0  | 63,752          |
| Pyd10_020      | SNP        | 10        | 50.5 | scaffold1302.0 | 47,319          |
| Pyd10_021      | SNP        | 10        | 50.5 | scaffold1206.0 | 39,172          |
| Pybd10_007     | SNP        | 10        | 52.4 | scaffold619.0  | 128,348         |
| Pyb10_210      | SNP        | 10        | 52.5 | scaffold157.0  | 744,140         |
| Pyb10_213      | SNP        | 10        | 52.7 | scaffold810.0  | 49,233          |
| Pyd10_022      | SNP        | 10        | 52.7 | scaffold177.0  | 211,601         |
| Pyb10_214      | SNP        | 10        | 52.7 | scaffold810.0  | 160,585         |
| Pyb10_216      | SNP        | 10        | 52.8 | scaffold810.0  | 135,700         |
| <b>CH03d11</b> | <b>SSR</b> | <b>10</b> | 53.0 | scaffold177.0  | 204,200-203,936 |
| Pyd10_025      | SNP        | 10        | 55.4 | scaffold420.0  | 55,065          |
| Pyd10_026      | SNP        | 10        | 55.4 | scaffold403.0  | 286,242         |

|                    |            |           |      |                |                 |
|--------------------|------------|-----------|------|----------------|-----------------|
| Pyd10_027          | SNP        | 10        | 55.5 | scaffold220.0  | 281,817         |
| Pyb10_224          | SNP        | 10        | 55.6 | scaffold177.0  | 385,946         |
| Pyb10_227          | SNP        | 10        | 55.8 | scaffold177.0  | 122,104         |
| Pyb10_228          | SNP        | 10        | 55.8 | scaffold157.0  | 565,502         |
| Pyb10_229          | SNP        | 10        | 55.9 | scaffold157.0  | 511,773         |
| Pyb10_230          | SNP        | 10        | 56.0 | scaffold177.0  | 295,185         |
| Pyb10_231          | SNP        | 10        | 56.0 | scaffold177.0  | 283,826         |
| Pyb10_233          | SNP        | 10        | 56.1 | scaffold157.0  | 371,865         |
| Pyb10_234          | SNP        | 10        | 56.1 | scaffold157.0  | 516,224         |
| <b>BGT24</b>       | <b>SSR</b> | <b>10</b> | 56.2 | scaffold157.0  | 229,119-229,348 |
| Pyb10_236          | SNP        | 10        | 56.3 | scaffold157.0  | 555,880         |
| Pyb10_239          | SNP        | 10        | 56.6 | scaffold157.0  | 256,658         |
| Pyb10_241          | SNP        | 10        | 56.9 | scaffold177.0  | 253,434         |
| Pyb10_248          | SNP        | 10        | 58.4 | scaffold177.0  | 24,754          |
| Pyb10_253          | SNP        | 10        | 59.6 | scaffold177.0  | 111,332         |
| Pyb10_256          | SNP        | 10        | 62.9 | scaffold420.0  | 92,850          |
| Pyb10_260          | SNP        | 10        | 63.6 | scaffold403.0  | 306,980         |
| Pyb10_261          | SNP        | 10        | 63.6 | scaffold403.0  | 285,073         |
| Pyb10_262          | SNP        | 10        | 63.7 | scaffold403.0  | 282,798         |
| Pyb10_265          | SNP        | 10        | 64.0 | scaffold220.0  | 574,520         |
| Pyb10_266          | SNP        | 10        | 64.1 | scaffold403.0  | 392,049         |
| Pybd10_008         | SNP        | 10        | 64.8 | scaffold560.0  | 221,815         |
| <b>CH02c11</b>     | <b>SSR</b> | <b>10</b> | 65.0 | scaffold220.0  | 189,073-189,299 |
| Pyb10_271          | SNP        | 10        | 66.4 | scaffold377.0  | 69,679          |
| Pybd10_010         | SNP        | 10        | 66.5 | scaffold220.0  | 574,568         |
| Pyb10_272          | SNP        | 10        | 66.6 | scaffold220.0  | 549,847         |
| Pyb10_274          | SNP        | 10        | 67.2 | scaffold377.0  | 89,199          |
| <b>NH045a</b>      | <b>SSR</b> | <b>10</b> | 67.4 | scaffold377.0  | 153,709-154,378 |
| Pybd10_011         | SNP        | 10        | 72.0 | scaffold220.0  | 311,626         |
| Pyb10_277          | SNP        | 10        | 79.7 | scaffold562.0  | 121,441         |
| Pyb10_281          | SNP        | 10        | 80.3 | scaffold308.0  | 106,100         |
| Pyb10_284          | SNP        | 10        | 80.8 | scaffold562.0  | 134,138         |
| Pybd10_012         | SNP        | 10        | 82.6 | scaffold881.0  | 44,898          |
| <b>CH01f12</b>     | <b>SSR</b> | <b>10</b> | 82.8 | scaffold881.0  | 117,385-117,531 |
| <b>CTG1066085-</b> | <b>SSR</b> | <b>10</b> | 83.0 | Not_anchored   | -               |
| Pybd10_013         | SNP        | 10        | 83.0 | scaffold62.0   | 67,361          |
| Pyd10_042          | SNP        | 10        | 84.7 | scaffold423.0  | 126,744         |
| Pybd10_014         | SNP        | 10        | 86.3 | scaffold650.0  | 89,917          |
| <b>AU223670</b>    | <b>SSR</b> | <b>10</b> | 86.5 | scaffold650.0  | 192,966-193,162 |
| Pybd10_017         | SNP        | 10        | 88.8 | scaffold1156.0 | 5,644           |
| Pyb10_289          | SNP        | 10        | 91.6 | scaffold34.0   | 1,313,358       |
| Pyb10_291          | SNP        | 10        | 91.7 | scaffold298.0  | 106,091         |
| Pyb10_292          | SNP        | 10        | 91.8 | scaffold189.0  | 291,953         |
| Pyb10_293          | SNP        | 10        | 91.9 | scaffold521.0  | 283,634         |



|               |            |           |       |               |                 |
|---------------|------------|-----------|-------|---------------|-----------------|
| Pyb10_294     | SNP        | 10        | 91.9  | scaffold521.0 | 304,505         |
| Pyb10_298     | SNP        | 10        | 92.3  | scaffold282.0 | 359,862         |
| Pyb10_299     | SNP        | 10        | 92.4  | scaffold962.0 | 130,123         |
| <b>NH039a</b> | <b>SSR</b> | <b>10</b> | 92.5  | scaffold282.0 | 484,551-484,678 |
| Pyb10_303     | SNP        | 10        | 92.6  | scaffold408.0 | 165,717         |
| Pyb10_305     | SNP        | 10        | 92.6  | scaffold408.0 | 101,938         |
| Pyb10_307     | SNP        | 10        | 92.8  | scaffold176.0 | 132,191         |
| Pyb10_308     | SNP        | 10        | 92.8  | scaffold189.0 | 313,733         |
| Pyb10_315     | SNP        | 10        | 93.5  | scaffold321.0 | 461,137         |
| Pyb10_327     | SNP        | 10        | 94.3  | scaffold308.0 | 120,536         |
| Pyb10_329     | SNP        | 10        | 94.4  | scaffold562.0 | 15,956          |
| Pyb10_331     | SNP        | 10        | 94.4  | scaffold308.0 | 475,102         |
| Pyb10_332     | SNP        | 10        | 94.5  | scaffold606.0 | 111,795         |
| Pyb10_333     | SNP        | 10        | 94.5  | scaffold308.0 | 102,775         |
| Pyb10_334     | SNP        | 10        | 94.5  | scaffold308.0 | 20,460          |
| Pyb10_341     | SNP        | 10        | 94.9  | scaffold562.0 | 23,970          |
| Pyb10_342     | SNP        | 10        | 94.9  | scaffold562.0 | 121,423         |
| Pyb10_347     | SNP        | 10        | 95.6  | scaffold606.0 | 242,621         |
| Pyb10_352     | SNP        | 10        | 96.1  | scaffold220.0 | 271,996         |
| Pyb10_361     | SNP        | 10        | 102.9 | scaffold338.0 | 366,419         |
| Pyb10_367     | SNP        | 10        | 103.3 | scaffold192.0 | 30,377          |
| Pyb10_371     | SNP        | 10        | 103.4 | scaffold164.0 | 321,899         |
| Pyb10_374     | SNP        | 10        | 103.4 | scaffold192.0 | 96,598          |
| Pyb10_375     | SNP        | 10        | 103.5 | scaffold338.0 | 177,493         |
| Pyb10_381     | SNP        | 10        | 106.8 | scaffold163.0 | 161,950         |
| Pyb10_384     | SNP        | 10        | 107.1 | scaffold84.0  | 898,461         |
| Pyb10_385     | SNP        | 10        | 107.1 | scaffold296.0 | 17,935          |
| Pyb10_389     | SNP        | 10        | 108.1 | scaffold84.0  | 221,728         |
| Pyb10_393     | SNP        | 10        | 108.2 | scaffold985.0 | 101,886         |
| Pyb10_394     | SNP        | 10        | 108.2 | scaffold196.0 | 370,351         |
| Pyb10_395     | SNP        | 10        | 108.2 | scaffold84.0  | 308,576         |
| Pyb10_402     | SNP        | 10        | 108.4 | scaffold84.0  | 281,042         |
| Pyb10_403     | SNP        | 10        | 108.4 | scaffold84.0  | 426,477         |
| Pybd10_027    | SNP        | 10        | 112.2 | scaffold232.0 | 213,084         |
| Pyb10_406     | SNP        | 10        | 113.1 | scaffold196.0 | 349,110         |
| Pyb10_410     | SNP        | 10        | 117.7 | scaffold192.0 | 45,681          |
| Pyb10_413     | SNP        | 10        | 118.9 | scaffold163.0 | 234,085         |
| Pybd10_029    | SNP        | 10        | 122.2 | scaffold84.0  | 697,685         |
| Pyb10_423     | SNP        | 10        | 126.1 | scaffold164.0 | 132,442         |
| Pyb10_429     | SNP        | 10        | 126.6 | scaffold164.0 | 216,492         |
| Pyb10_430     | SNP        | 10        | 126.6 | scaffold164.0 | 55,067          |
| Pyb10_431     | SNP        | 10        | 126.6 | scaffold164.0 | 132,363         |
| Pyb10_433     | SNP        | 10        | 126.8 | scaffold84.0  | 942,492         |
| Pyb10_435     | SNP        | 10        | 126.9 | scaffold84.0  | 763,137         |

|                |            |           |              |                      |                        |
|----------------|------------|-----------|--------------|----------------------|------------------------|
| Pyb10_438      | SNP        | 10        | 127.0        | scaffold84.0         | 772,932                |
| Pyb10_439      | SNP        | 10        | 127.0        | scaffold715.0        | 101,923                |
| Pyb10_440      | SNP        | 10        | 127.0        | scaffold296.0        | 128,212                |
| Pyb10_452      | SNP        | 10        | 127.4        | scaffold874.0        | 69,756                 |
| Pyb10_456      | SNP        | 10        | 127.4        | scaffold271.0        | 11,815                 |
| Pyb10_460      | SNP        | 10        | 127.5        | scaffold443.0        | 65,941                 |
| Pyb10_469      | SNP        | 10        | 127.7        | scaffold443.0        | 319,882                |
| Pyb10_470      | SNP        | 10        | 127.7        | scaffold667.0        | 55,130                 |
| Pyb10_474      | SNP        | 10        | 128.1        | scaffold196.0        | 376,415                |
| Pyb10_480      | SNP        | 10        | 128.7        | scaffold164.0        | 153,029                |
| Pyb10_481      | SNP        | 10        | 128.8        | scaffold164.0        | 43,135                 |
| Pyb10_482      | SNP        | 10        | 129.0        | scaffold164.0        | 93,396                 |
| Pyb10_486      | SNP        | 10        | 129.8        | scaffold256.0        | 390,099                |
| Pyb10_488      | SNP        | 10        | 129.9        | scaffold192.0        | 175,066                |
| Pyb10_489      | SNP        | 10        | 129.9        | scaffold338.0        | 341,739                |
| Pyb10_492      | SNP        | 10        | 129.9        | scaffold338.0        | 262,523                |
| Pyb10_493      | SNP        | 10        | 129.9        | scaffold338.0        | 415,806                |
| Pyb10_496      | SNP        | 10        | 130.0        | scaffold862.0        | 74,175                 |
| Pyb10_500      | SNP        | 10        | 130.3        | scaffold976.0        | 71,363                 |
| Pyb10_506      | SNP        | 10        | 130.9        | scaffold256.0        | 312,274                |
| Pyd10_054      | SNP        | 10        | 138.6        | scaffold164.0        | 238,999                |
| Pybd10_033     | SNP        | 10        | 141.9        | scaffold232.0        | 131,094                |
| <b>CH02a08</b> | <b>SSR</b> | <b>10</b> | <b>142.1</b> | <b>scaffold232.0</b> | <b>408,616-408,303</b> |
| Pyd11_001      | SNP        | 11        | 0.0          | scaffold538.0        | 171,962                |
| Pyb11_003      | SNP        | 11        | 0.9          | scaffold8.0          | 498,964                |
| Pyb11_004      | SNP        | 11        | 0.9          | scaffold8.0          | 481,189                |
| Pybd11_004     | SNP        | 11        | 3.1          | scaffold1138.0       | 2,362                  |
| <b>CH04g07</b> | <b>SSR</b> | <b>11</b> | <b>3.5</b>   | <b>scaffold679.0</b> | <b>19,235-19,401</b>   |
| Pyb11_006      | SNP        | 11        | 3.5          | scaffold1138.0       | 101,172                |
| Pyd11_005      | SNP        | 11        | 3.9          | scaffold26.0         | 119,238                |
| Pyb11_012      | SNP        | 11        | 4.3          | scaffold538.0        | 303,354                |
| Pyb11_013      | SNP        | 11        | 4.3          | scaffold538.0        | 76,690                 |
| Pyb11_014      | SNP        | 11        | 4.4          | scaffold538.0        | 68,782                 |
| Pybd11_005     | SNP        | 11        | 5.4          | scaffold538.0        | 303,904                |
| Pyb11_024      | SNP        | 11        | 5.4          | scaffold538.0        | 58,299                 |
| Pyb11_025      | SNP        | 11        | 5.4          | scaffold961.0        | 103,268                |
| Pyb11_027      | SNP        | 11        | 5.4          | scaffold961.0        | 56,521                 |
| Pyb11_028      | SNP        | 11        | 5.4          | scaffold961.0        | 141,993                |
| Pyb11_029      | SNP        | 11        | 5.4          | scaffold538.0        | 10,641                 |
| Pyb11_031      | SNP        | 11        | 5.5          | scaffold156.0        | 206,224                |
| Pyb11_032      | SNP        | 11        | 5.5          | scaffold538.0        | 226,358                |
| Pyb11_034      | SNP        | 11        | 5.5          | scaffold926.0        | 150,684                |
| Pyb11_035      | SNP        | 11        | 5.5          | scaffold538.0        | 91,741                 |
| Pyb11_036      | SNP        | 11        | 5.5          | scaffold538.0        | 189,813                |

---

|            |     |    |      |               |           |
|------------|-----|----|------|---------------|-----------|
| Pyb11_038  | SNP | 11 | 5.9  | scaffold26.0  | 26,367    |
| Pyb11_039  | SNP | 11 | 6.1  | scaffold538.0 | 13,122    |
| Pyb11_041  | SNP | 11 | 6.1  | scaffold165.1 | 41,988    |
| Pyb11_042  | SNP | 11 | 6.1  | scaffold165.2 | 236,461   |
| Pybd11_006 | SNP | 11 | 6.2  | scaffold26.0  | 265,475   |
| Pyd11_006  | SNP | 11 | 6.3  | scaffold165.1 | 67,609    |
| Pyb11_051  | SNP | 11 | 6.5  | scaffold156.0 | 225,304   |
| Pyb11_052  | SNP | 11 | 6.5  | scaffold301.0 | 171,596   |
| Pyb11_058  | SNP | 11 | 6.5  | scaffold26.0  | 241,707   |
| Pyb11_060  | SNP | 11 | 6.5  | scaffold165.2 | 89,675    |
| Pyb11_061  | SNP | 11 | 6.5  | scaffold156.0 | 4,393     |
| Pyb11_062  | SNP | 11 | 6.5  | scaffold156.0 | 72,957    |
| Pyb11_063  | SNP | 11 | 6.5  | scaffold301.0 | 131,104   |
| Pyb11_064  | SNP | 11 | 6.5  | scaffold26.0  | 227,537   |
| Pyb11_065  | SNP | 11 | 6.5  | scaffold165.2 | 227,733   |
| Pyb11_066  | SNP | 11 | 6.5  | scaffold301.0 | 250,256   |
| Pyb11_067  | SNP | 11 | 6.5  | scaffold165.2 | 128,166   |
| Pyb11_070  | SNP | 11 | 6.5  | scaffold156.0 | 130,725   |
| Pyb11_071  | SNP | 11 | 6.5  | scaffold26.0  | 331,586   |
| Pyb11_072  | SNP | 11 | 6.5  | scaffold301.0 | 256,846   |
| Pyb11_073  | SNP | 11 | 6.5  | scaffold156.0 | 13,555    |
| Pyb11_074  | SNP | 11 | 6.5  | scaffold165.2 | 284,661   |
| Pyb11_076  | SNP | 11 | 6.6  | scaffold156.0 | 229,434   |
| Pyb11_079  | SNP | 11 | 6.6  | scaffold165.2 | 207,815   |
| Pyb11_082  | SNP | 11 | 7.0  | scaffold156.0 | 26,662    |
| Pyb11_083  | SNP | 11 | 7.6  | scaffold156.0 | 312,363   |
| Pyb11_084  | SNP | 11 | 7.6  | scaffold8.0   | 668,040   |
| Pyb11_085  | SNP | 11 | 7.6  | scaffold679.0 | 150,860   |
| Pyb11_086  | SNP | 11 | 7.6  | scaffold8.0   | 735,201   |
| Pyb11_087  | SNP | 11 | 7.6  | scaffold679.0 | 37,222    |
| Pyb11_088  | SNP | 11 | 7.6  | scaffold679.0 | 26,162    |
| Pyb11_089  | SNP | 11 | 7.6  | scaffold8.0   | 898,309   |
| Pyb11_091  | SNP | 11 | 7.6  | scaffold8.0   | 1,064,183 |
| Pyb11_094  | SNP | 11 | 7.6  | scaffold8.0   | 1,080,474 |
| Pyb11_099  | SNP | 11 | 7.7  | scaffold8.0   | 934,325   |
| Pyb11_103  | SNP | 11 | 8.0  | scaffold165.2 | 266,475   |
| Pyb11_105  | SNP | 11 | 8.3  | scaffold8.0   | 1,081,352 |
| Pyb11_106  | SNP | 11 | 8.4  | scaffold8.0   | 629,175   |
| Pyb11_107  | SNP | 11 | 8.4  | scaffold679.0 | 89,105    |
| Pyb11_108  | SNP | 11 | 8.4  | scaffold8.0   | 1,312,012 |
| Pyb11_113  | SNP | 11 | 9.2  | scaffold8.0   | 762,756   |
| Pyb11_115  | SNP | 11 | 10.7 | scaffold8.0   | 1,725,612 |
| Pyb11_116  | SNP | 11 | 10.8 | scaffold8.0   | 1,732,062 |
| Pyb11_118  | SNP | 11 | 11.6 | scaffold337.0 | 193,995   |

---

|              |            |           |             |                       |                      |
|--------------|------------|-----------|-------------|-----------------------|----------------------|
| Pyb11_119    | SNP        | 11        | 11.9        | scaffold603.0         | 12,651               |
| Pyb11_121    | SNP        | 11        | 12.2        | scaffold603.0         | 35,199               |
| Pybd11_007   | SNP        | 11        | 12.5        | scaffold1246.0        | 42,800               |
| Pyb11_124    | SNP        | 11        | 12.7        | scaffold45.0          | 622,714              |
| Pyb11_125    | SNP        | 11        | 12.9        | scaffold45.0          | 688,643              |
| Pyb11_126    | SNP        | 11        | 13.0        | scaffold337.0         | 334,174              |
| Pyb11_127    | SNP        | 11        | 13.0        | scaffold337.0         | 99,508               |
| Pybd11_008   | SNP        | 11        | 13.9        | scaffold337.0         | 270,900              |
| Pyb11_129    | SNP        | 11        | 14.7        | scaffold12.0          | 585,921              |
| Pyb11_130    | SNP        | 11        | 16.1        | scaffold229.0         | 155,435              |
| Pyb11_131    | SNP        | 11        | 16.1        | scaffold45.0          | 14,327               |
| Pybd11_010   | SNP        | 11        | 16.4        | scaffold229.0         | 157,783              |
| Pyb11_132    | SNP        | 11        | 24.8        | scaffold1552.0        | 22,705               |
| Pyb11_140    | SNP        | 11        | 27.4        | scaffold156.0         | 244,583              |
| Pyb11_142    | SNP        | 11        | 30.0        | scaffold45.0          | 579,361              |
| Pyb11_144    | SNP        | 11        | 31.0        | scaffold337.0         | 407,947              |
| Pyb11_146    | SNP        | 11        | 31.0        | scaffold45.0          | 584,264              |
| Pyb11_149    | SNP        | 11        | 31.1        | scaffold1552.0        | 3,339                |
| Pyb11_151    | SNP        | 11        | 31.1        | scaffold603.0         | 71,893               |
| Pyb11_152    | SNP        | 11        | 31.1        | scaffold45.0          | 687,471              |
| Pyb11_153    | SNP        | 11        | 31.1        | scaffold337.0         | 306,655              |
| Pyb11_155    | SNP        | 11        | 31.1        | scaffold337.0         | 361,362              |
| Pyb11_157    | SNP        | 11        | 31.1        | scaffold12.0          | 540,244              |
| Pyb11_158    | SNP        | 11        | 31.1        | scaffold337.0         | 315,216              |
| Pyb11_162    | SNP        | 11        | 31.4        | scaffold603.0         | 12,597               |
| Pyb11_164    | SNP        | 11        | 31.4        | scaffold8.0           | 1,520,242            |
| Pyb11_166    | SNP        | 11        | 31.5        | scaffold337.0         | 446,792              |
| Pyb11_168    | SNP        | 11        | 31.8        | scaffold603.0         | 39,019               |
| Pybd11_013   | SNP        | 11        | 33.6        | scaffold497.0         | 207,288              |
| Pyb11_175    | SNP        | 11        | 34.9        | scaffold497.0         | 106,226              |
| Pyb11_176    | SNP        | 11        | 35.2        | scaffold1070.0        | 56,049               |
| Pyb11_179    | SNP        | 11        | 36.1        | scaffold383.0         | 225,973              |
| Pyb11_181    | SNP        | 11        | 36.1        | scaffold383.0         | 161,712              |
| <b>IPP14</b> | <b>SSR</b> | <b>11</b> | <b>36.8</b> | <b>scaffold1283.0</b> | <b>49,468-49,717</b> |
| Pyb11_187    | SNP        | 11        | 37.0        | scaffold56.0          | 603,970              |
| Pyb11_188    | SNP        | 11        | 37.0        | scaffold720.0         | 156,650              |
| Pyb11_190    | SNP        | 11        | 37.0        | scaffold720.0         | 131,106              |
| Pyb11_201    | SNP        | 11        | 38.1        | scaffold912.0         | 26,320               |
| Pyb11_202    | SNP        | 11        | 38.1        | scaffold41.0          | 990,318              |
| Pyb11_204    | SNP        | 11        | 38.5        | scaffold41.0          | 945,082              |
| Pyb11_205    | SNP        | 11        | 38.5        | scaffold41.0          | 1,233,496            |
| Pyb11_207    | SNP        | 11        | 38.5        | scaffold41.0          | 1,036,808            |
| Pyb11_208    | SNP        | 11        | 39.2        | scaffold138.0         | 611,021              |
| Pyb11_210    | SNP        | 11        | 39.3        | scaffold138.0         | 577,320              |

|                |            |           |             |                      |                        |
|----------------|------------|-----------|-------------|----------------------|------------------------|
| Pyb11_211      | SNP        | 11        | 39.3        | scaffold306.0        | 461,060                |
| Pyb11_213      | SNP        | 11        | 39.3        | scaffold306.0        | 453,590                |
| Pyb11_214      | SNP        | 11        | 39.3        | scaffold493.0        | 104,107                |
| Pyb11_215      | SNP        | 11        | 39.3        | scaffold138.0        | 178,022                |
| Pyb11_219      | SNP        | 11        | 39.4        | scaffold138.0        | 148,382                |
| Pyb11_220      | SNP        | 11        | 39.5        | scaffold1288.0       | 4,163                  |
| Pyb11_224      | SNP        | 11        | 39.8        | scaffold267.0        | 512,128                |
| Pyb11_230      | SNP        | 11        | 40.4        | scaffold1288.0       | 8,834                  |
| Pybd11_017     | SNP        | 11        | 42.4        | scaffold1519.0       | 20,186                 |
| Pybd11_019     | SNP        | 11        | 44.8        | scaffold138.0        | 583,142                |
| Pybd11_021     | SNP        | 11        | 46.2        | scaffold41.0         | 1,248,274              |
| Pybd11_023     | SNP        | 11        | 49.7        | scaffold138.0        | 634,673                |
| Pyd11_017      | SNP        | 11        | 53.3        | scaffold56.0         | 518,761                |
| Pyb11_240      | SNP        | 11        | 62.1        | scaffold847.0        | 136,913                |
| <b>CH05c02</b> | <b>SSR</b> | <b>11</b> | <b>67.0</b> | <b>scaffold5.0</b>   | <b>865,900-866,080</b> |
| Pyb11_247      | SNP        | 11        | 68.4        | scaffold892.0        | 146,068                |
| Pyb11_250      | SNP        | 11        | 68.6        | scaffold892.0        | 147,622                |
| Pyb11_251      | SNP        | 11        | 68.9        | scaffold847.0        | 63,300                 |
| Pyb11_253      | SNP        | 11        | 69.1        | scaffold1074.0       | 84,257                 |
| Pyb11_255      | SNP        | 11        | 69.1        | scaffold236.0        | 482,882                |
| Pyb11_264      | SNP        | 11        | 69.9        | scaffold5.0          | 870,213                |
| Pyb11_265      | SNP        | 11        | 69.9        | scaffold5.0          | 1,131,368              |
| Pyb11_266      | SNP        | 11        | 69.9        | scaffold5.0          | 1,439,895              |
| Pyb11_268      | SNP        | 11        | 70.0        | scaffold5.0          | 1,108,064              |
| Pyb11_269      | SNP        | 11        | 70.0        | scaffold5.0          | 850,288                |
| Pyb11_270      | SNP        | 11        | 70.1        | scaffold5.0          | 816,686                |
| Pyb11_271      | SNP        | 11        | 70.1        | scaffold5.0          | 867,764                |
| Pyb11_272      | SNP        | 11        | 70.2        | scaffold5.0          | 1,430,186              |
| Pyb11_273      | SNP        | 11        | 70.3        | scaffold5.0          | 1,116,066              |
| Pyb11_276      | SNP        | 11        | 70.4        | scaffold5.0          | 1,008,202              |
| Pyb11_278      | SNP        | 11        | 70.5        | scaffold5.0          | 948,369                |
| Pyb11_281      | SNP        | 11        | 71.0        | scaffold268.0        | 472,754                |
| Pyb11_283      | SNP        | 11        | 71.1        | scaffold576.0        | 257,124                |
| Pyb11_284      | SNP        | 11        | 71.1        | scaffold5.0          | 1,120,971              |
| Pyb11_286      | SNP        | 11        | 71.5        | scaffold210.0        | 157,575                |
| Pyb11_288      | SNP        | 11        | 71.6        | scaffold1016.0       | 85,925                 |
| Pyb11_290      | SNP        | 11        | 71.7        | scaffold518.0        | 32,817                 |
| Pyb11_292      | SNP        | 11        | 71.9        | scaffold909.0        | 33,619                 |
| <b>NH005b</b>  | <b>SSR</b> | <b>11</b> | <b>72.2</b> | <b>scaffold227.0</b> | <b>300,357-300,680</b> |
| Pyb11_294      | SNP        | 11        | 72.3        | scaffold723.0        | 185,301                |
| Pyb11_296      | SNP        | 11        | 72.5        | scaffold669.0        | 157,515                |
| Pyb11_300      | SNP        | 11        | 72.7        | scaffold669.0        | 17,742                 |
| Pybd11_027     | SNP        | 11        | 73.0        | scaffold576.0        | 219,323                |
| Pybd11_029     | SNP        | 11        | 73.9        | scaffold498.0        | 93,564                 |

|                |            |           |              |               |               |
|----------------|------------|-----------|--------------|---------------|---------------|
| Pyb11_302      | SNP        | 11        | 75.0         | scaffold510.0 | 14,261        |
| Pyb11_303      | SNP        | 11        | 75.0         | scaffold52.0  | 824,821       |
| Pyb11_306      | SNP        | 11        | 75.3         | scaffold52.0  | 686,026       |
| Pyb11_307      | SNP        | 11        | 75.4         | scaffold498.0 | 40,708        |
| Pyb11_310      | SNP        | 11        | 75.5         | scaffold460.0 | 171,174       |
| Pyb11_313      | SNP        | 11        | 75.5         | scaffold153.0 | 63,152        |
| Pyb11_316      | SNP        | 11        | 75.7         | scaffold52.0  | 535,314       |
| Pyb11_319      | SNP        | 11        | 75.9         | scaffold52.0  | 645,262       |
| Pyb11_321      | SNP        | 11        | 75.9         | scaffold52.0  | 1,065,019     |
| Pyb11_322      | SNP        | 11        | 75.9         | scaffold52.0  | 1,064,983     |
| Pyb11_325      | SNP        | 11        | 75.9         | scaffold52.0  | 1,087,047     |
| Pyb11_327      | SNP        | 11        | 76.0         | scaffold52.0  | 856,630       |
| Pyb11_328      | SNP        | 11        | 76.0         | scaffold52.0  | 542,673       |
| Pyb11_329      | SNP        | 11        | 76.1         | scaffold52.0  | 887,363       |
| Pybd11_030     | SNP        | 11        | 76.4         | scaffold643.0 | 182,821       |
| Pybd11_031     | SNP        | 11        | 76.9         | scaffold52.0  | 742,272       |
| Pyb11_332      | SNP        | 11        | 77.7         | scaffold407.0 | 416,128       |
| Pyb11_335      | SNP        | 11        | 77.8         | scaffold407.0 | 376,330       |
| Pyb11_336      | SNP        | 11        | 77.9         | scaffold227.0 | 586,862       |
| Pyb11_341      | SNP        | 11        | 78.0         | scaffold52.0  | 47,666        |
| Pyb11_343      | SNP        | 11        | 79.4         | scaffold643.0 | 115,278       |
| Pyb11_344      | SNP        | 11        | 79.5         | scaffold407.0 | 218,074       |
| Pyb11_345      | SNP        | 11        | 79.8         | scaffold407.0 | 92,030        |
| Pyb11_346      | SNP        | 11        | 79.8         | scaffold407.0 | 336,194       |
| Pyb11_347      | SNP        | 11        | 79.8         | scaffold407.0 | 70,552        |
| Pyb11_348      | SNP        | 11        | 79.8         | scaffold407.0 | 253,121       |
| Pyb11_349      | SNP        | 11        | 79.9         | scaffold407.0 | 107,219       |
| Pyb11_350      | SNP        | 11        | 79.9         | scaffold643.0 | 254,134       |
| Pyb11_351      | SNP        | 11        | 79.9         | scaffold407.0 | 179,823       |
| Pyb11_352      | SNP        | 11        | 79.9         | scaffold407.0 | 185,067       |
| Pyb11_353      | SNP        | 11        | 80.0         | scaffold407.0 | 97,711        |
| Pybd11_032     | SNP        | 11        | 80.7         | scaffold31.0  | 656,689       |
| Pyb11_359      | SNP        | 11        | 81.8         | scaffold31.0  | 579,634       |
| Pybd11_033     | SNP        | 11        | 82.2         | scaffold36.0  | 327,509       |
| Pyb11_366      | SNP        | 11        | 82.8         | scaffold36.0  | 328,589       |
| Pyb11_372      | SNP        | 11        | 86.6         | scaffold286.0 | 185,051       |
| Pyb11_374      | SNP        | 11        | 87.4         | scaffold286.0 | 278,703       |
| Pyd11_032      | SNP        | 11        | 89.2         | scaffold460.0 | 18,646        |
| Pyb11_375      | SNP        | 11        | 91.2         | scaffold286.0 | 209,724       |
| Pybd11_035     | SNP        | 11        | 99.4         | scaffold259.0 | 284,322       |
| <b>CH04h02</b> | <b>SSR</b> | <b>11</b> | <b>100.6</b> | scaffold513.0 | 20,317-20,501 |
| Pybd11_036     | SNP        | 11        | 102.3        | scaffold513.0 | 45,690        |
| Pyb11_377      | SNP        | 11        | 103.5        | scaffold513.0 | 152,218       |
| Pyb11_378      | SNP        | 11        | 103.5        | scaffold513.0 | 165,366       |

|               |            |           |              |                      |                        |
|---------------|------------|-----------|--------------|----------------------|------------------------|
| Pyb11_379     | SNP        | 11        | 103.6        | scaffold513.0        | 308,325                |
| Pyb11_380     | SNP        | 11        | 103.7        | scaffold513.0        | 234,298                |
| Pyb11_381     | SNP        | 11        | 106.1        | scaffold114.0        | 458,333                |
| Pyb11_382     | SNP        | 11        | 106.7        | scaffold114.0        | 313,086                |
| Pyb11_383     | SNP        | 11        | 106.7        | scaffold114.0        | 801,547                |
| Pyb11_384     | SNP        | 11        | 106.7        | scaffold513.0        | 189,963                |
| Pyb11_385     | SNP        | 11        | 106.8        | scaffold114.0        | 430,148                |
| Pyb11_386     | SNP        | 11        | 107.0        | scaffold114.0        | 361,922                |
| Pyb11_388     | SNP        | 11        | 107.4        | scaffold114.0        | 621,616                |
| Pyb11_393     | SNP        | 11        | 107.9        | scaffold121.0        | 573,604                |
| Pyb11_398     | SNP        | 11        | 108.9        | scaffold355.0        | 17,705                 |
| Pyb11_408     | SNP        | 11        | 111.0        | scaffold516.0        | 234,627                |
| Pyb11_411     | SNP        | 11        | 111.2        | scaffold153.0        | 776,474                |
| <b>EMPe11</b> | <b>SSR</b> | <b>11</b> | <b>111.4</b> | <b>scaffold259.0</b> | <b>215,979-216,123</b> |
| Pyb11_415     | SNP        | 11        | 111.5        | scaffold1137.0       | 27,051                 |
| Pyb11_416     | SNP        | 11        | 111.6        | scaffold516.0        | 247,572                |
| Pyb11_418     | SNP        | 11        | 111.8        | scaffold259.0        | 454,208                |
| Pybd11_039    | SNP        | 11        | 111.9        | scaffold259.0        | 284,360                |
| Pyb11_421     | SNP        | 11        | 113.4        | scaffold259.0        | 221,458                |
| Pyb11_422     | SNP        | 11        | 113.5        | scaffold259.0        | 384,602                |
| Pyb11_423     | SNP        | 11        | 113.5        | scaffold259.0        | 323,525                |
| Pyb11_425     | SNP        | 11        | 114.4        | scaffold259.0        | 174,289                |
| Pyb11_428     | SNP        | 11        | 115.5        | scaffold181.0        | 502,758                |
| Pyb11_429     | SNP        | 11        | 115.5        | scaffold181.0        | 509,637                |
| Pyb11_430     | SNP        | 11        | 115.5        | scaffold699.0        | 208,965                |
| Pyb11_432     | SNP        | 11        | 115.6        | scaffold181.0        | 75,914                 |
| Pyb11_434     | SNP        | 11        | 115.7        | scaffold622.0        | 94,421                 |
| Pyb11_435     | SNP        | 11        | 115.8        | scaffold181.0        | 509,607                |
| Pybd11_040    | SNP        | 11        | 115.9        | scaffold699.0        | 93,338                 |
| Pyb11_441     | SNP        | 11        | 116.2        | scaffold181.0        | 90,245                 |
| Pyb11_442     | SNP        | 11        | 116.5        | scaffold181.0        | 494,186                |
| Pyd11_052     | SNP        | 11        | 117.9        | scaffold259.0        | 431,251                |
| Pyd11_053     | SNP        | 11        | 117.9        | scaffold931.0        | 133,915                |
| Pyd11_054     | SNP        | 11        | 117.9        | scaffold259.0        | 376,712                |
| Pyd11_055     | SNP        | 11        | 117.9        | scaffold259.0        | 211,830                |
| Pybd11_041    | SNP        | 11        | 118.4        | scaffold181.0        | 491,061                |
| Pyd11_057     | SNP        | 11        | 119.0        | scaffold622.0        | 165,512                |
| Pyb11_456     | SNP        | 11        | 120.9        | scaffold461.0        | 295,871                |
| Pyb11_459     | SNP        | 11        | 123.0        | scaffold286.0        | 316,534                |
| Pyb11_461     | SNP        | 11        | 123.3        | scaffold286.0        | 309,146                |
| Pyb11_462     | SNP        | 11        | 123.3        | scaffold286.0        | 319,378                |
| Pyb11_463     | SNP        | 11        | 123.3        | scaffold286.0        | 310,274                |
| Pyb11_467     | SNP        | 11        | 123.3        | scaffold286.0        | 364,478                |
| Pyb11_468     | SNP        | 11        | 123.7        | scaffold1294.0       | 1,336                  |

---

|            |     |    |       |                |         |
|------------|-----|----|-------|----------------|---------|
| Pybd11_043 | SNP | 11 | 127.0 | scaffold286.0  | 279,697 |
| Pyb11_474  | SNP | 11 | 131.3 | scaffold484.0  | 327,340 |
| Pyb11_475  | SNP | 11 | 131.4 | scaffold36.0   | 172,924 |
| Pyb11_476  | SNP | 11 | 131.4 | scaffold36.0   | 155,058 |
| Pyb11_484  | SNP | 11 | 131.5 | scaffold484.0  | 152,299 |
| Pyb11_487  | SNP | 11 | 133.0 | scaffold643.0  | 195,216 |
| Pyb11_492  | SNP | 11 | 133.8 | scaffold643.0  | 219,790 |
| Pyb11_494  | SNP | 11 | 137.2 | scaffold52.0   | 491,878 |
| Pyb11_495  | SNP | 11 | 137.5 | scaffold52.0   | 106,254 |
| Pyb11_497  | SNP | 11 | 137.9 | scaffold52.0   | 789,826 |
| Pyb11_498  | SNP | 11 | 138.0 | scaffold52.0   | 529,376 |
| Pyb11_499  | SNP | 11 | 138.0 | scaffold52.0   | 789,567 |
| Pyb11_501  | SNP | 11 | 138.0 | scaffold52.0   | 934,228 |
| Pyb11_502  | SNP | 11 | 138.0 | scaffold52.0   | 540,885 |
| Pyb11_504  | SNP | 11 | 138.1 | scaffold1106.0 | 105,940 |
| Pyb11_509  | SNP | 11 | 138.1 | scaffold52.0   | 556,025 |
| Pybd12_001 | SNP | 12 | 0.0   | scaffold1393.0 | 115     |
| Pyd12_006  | SNP | 12 | 2.6   | scaffold472.0  | 307,143 |
| Pyd12_008  | SNP | 12 | 3.0   | scaffold472.0  | 235,548 |
| Pyd12_010  | SNP | 12 | 5.8   | scaffold255.0  | 335,854 |
| Pyb12_001  | SNP | 12 | 9.3   | scaffold942.0  | 8,446   |
| Pyb12_002  | SNP | 12 | 9.4   | scaffold365.0  | 64,163  |
| Pyb12_003  | SNP | 12 | 9.7   | scaffold365.0  | 64,220  |
| Pyb12_007  | SNP | 12 | 10.7  | scaffold942.0  | 123,331 |
| Pyb12_008  | SNP | 12 | 10.7  | scaffold942.0  | 36,439  |
| Pyb12_015  | SNP | 12 | 11.2  | scaffold942.0  | 147,743 |
| Pyb12_016  | SNP | 12 | 11.2  | scaffold365.0  | 45,969  |
| Pyb12_019  | SNP | 12 | 11.3  | scaffold365.0  | 38,759  |
| Pyb12_021  | SNP | 12 | 11.4  | scaffold942.0  | 12,686  |
| Pyd12_020  | SNP | 12 | 12.2  | scaffold365.0  | 368,128 |
| Pyb12_023  | SNP | 12 | 12.4  | scaffold365.0  | 193,414 |
| Pyb12_024  | SNP | 12 | 12.8  | scaffold120.0  | 339,848 |
| Pyb12_027  | SNP | 12 | 13.1  | scaffold365.0  | 166,876 |
| Pyb12_028  | SNP | 12 | 13.6  | scaffold120.0  | 234,706 |
| Pyb12_029  | SNP | 12 | 13.6  | scaffold120.0  | 327,752 |
| Pyb12_030  | SNP | 12 | 13.6  | scaffold120.0  | 339,788 |
| Pyb12_031  | SNP | 12 | 13.6  | scaffold120.0  | 213,412 |
| Pyb12_036  | SNP | 12 | 14.4  | scaffold365.0  | 268,492 |
| Pyb12_041  | SNP | 12 | 16.0  | scaffold120.0  | 531,557 |
| Pyb12_042  | SNP | 12 | 16.0  | scaffold120.0  | 832,716 |
| Pyb12_046  | SNP | 12 | 16.6  | scaffold255.0  | 194,277 |
| Pybd12_003 | SNP | 12 | 23.6  | scaffold242.0  | 377,605 |
| Pyb12_050  | SNP | 12 | 26.9  | scaffold242.0  | 298,542 |
| Pyb12_052  | SNP | 12 | 27.7  | scaffold242.0  | 336,894 |

---



|                |            |           |      |                |                     |
|----------------|------------|-----------|------|----------------|---------------------|
| Pyb12_065      | SNP        | 12        | 30.1 | scaffold242.0  | 140,580             |
| Pyb12_068      | SNP        | 12        | 30.2 | scaffold242.0  | 219,240             |
| Pyb12_073      | SNP        | 12        | 31.5 | scaffold242.0  | 285,256             |
| Pyb12_088      | SNP        | 12        | 34.1 | scaffold217.0  | 283,270             |
| Pyb12_089      | SNP        | 12        | 34.1 | scaffold217.0  | 377,788             |
| Pyb12_090      | SNP        | 12        | 34.3 | scaffold130.0  | 40,670              |
| Pyb12_097      | SNP        | 12        | 35.2 | scaffold217.0  | 452,970             |
| Pyb12_099      | SNP        | 12        | 35.9 | scaffold217.0  | 27,255              |
| Pyb12_102      | SNP        | 12        | 36.0 | scaffold217.0  | 251,067             |
| Pyb12_103      | SNP        | 12        | 36.7 | scaffold217.0  | 517,832             |
| Pyb12_104      | SNP        | 12        | 37.0 | scaffold468.0  | 30,593              |
| Pyb12_106      | SNP        | 12        | 37.5 | scaffold468.0  | 90,424              |
| Pyb12_108      | SNP        | 12        | 37.9 | scaffold468.0  | 344,819             |
| Pyb12_110      | SNP        | 12        | 38.1 | scaffold468.0  | 283,765             |
| Pyb12_111      | SNP        | 12        | 39.8 | scaffold468.0  | 339,646             |
| Pyb12_113      | SNP        | 12        | 40.1 | scaffold468.0  | 280,987             |
| Pyb12_116      | SNP        | 12        | 42.0 | scaffold500.0  | 43,382              |
| Pyb12_118      | SNP        | 12        | 42.3 | scaffold783.0  | 19,772              |
| Pyb12_119      | SNP        | 12        | 42.3 | scaffold783.0  | 12,104              |
| Pyb12_120      | SNP        | 12        | 42.4 | scaffold783.0  | 113,112             |
| Pyb12_122      | SNP        | 12        | 46.4 | scaffold70.0   | 39,608              |
| Pyb12_126      | SNP        | 12        | 46.6 | scaffold70.0   | 17,156              |
| <b>CH01f02</b> | <b>SSR</b> | <b>12</b> | 46.6 | scaffold70.0   | 484,819-484,981     |
| Pyb12_130      | SNP        | 12        | 47.3 | scaffold262.0  | 478,057             |
| Pyb12_137      | SNP        | 12        | 48.1 | scaffold262.0  | 532,164             |
| <b>NB104a</b>  | <b>SSR</b> | <b>12</b> | 49.1 | scaffold303.0  | 394,431-394,599     |
| <b>CH01d09</b> | <b>SSR</b> | <b>12</b> | 52.0 | scaffold15.0   | 1,174,649-1,174,791 |
| Pyb12_142      | SNP        | 12        | 52.5 | scaffold15.0   | 555,135             |
| Pyb12_143      | SNP        | 12        | 52.5 | scaffold15.0   | 597,735             |
| Pyb12_146      | SNP        | 12        | 53.2 | scaffold15.0   | 593,801             |
| Pyd12_031      | SNP        | 12        | 69.7 | scaffold1316.0 | 59,974              |
| Pyd12_036      | SNP        | 12        | 77.9 | scaffold827.0  | 69,026              |
| Pyb12_149      | SNP        | 12        | 81.7 | scaffold309.0  | 310,114             |
| Pyb12_150      | SNP        | 12        | 81.7 | scaffold15.0   | 1,495,333           |
| Pyb12_153      | SNP        | 12        | 81.8 | scaffold589.0  | 31,266              |
| Pyb12_154      | SNP        | 12        | 81.8 | scaffold309.0  | 359,779             |
| Pyb12_157      | SNP        | 12        | 82.1 | scaffold580.0  | 197,658             |
| Pybd12_006     | SNP        | 12        | 82.9 | scaffold309.0  | 423,312             |
| Pyb12_161      | SNP        | 12        | 83.1 | scaffold589.0  | 85,573              |
| Pyb12_162      | SNP        | 12        | 83.1 | scaffold15.0   | 738,704             |
| Pyb12_163      | SNP        | 12        | 83.1 | scaffold15.0   | 410,249             |
| Pyb12_165      | SNP        | 12        | 83.3 | scaffold589.0  | 123,041             |
| Pyb12_166      | SNP        | 12        | 83.4 | scaffold15.0   | 894,268             |
| Pyb12_167      | SNP        | 12        | 83.4 | scaffold589.0  | 108,000             |

---

|            |     |    |       |                |           |
|------------|-----|----|-------|----------------|-----------|
| Pyb12_169  | SNP | 12 | 83.4  | scaffold15.0   | 1,225,598 |
| Pyb12_171  | SNP | 12 | 83.5  | scaffold303.0  | 370,373   |
| Pyb12_172  | SNP | 12 | 83.5  | scaffold15.0   | 1,155,594 |
| Pyb12_176  | SNP | 12 | 83.6  | scaffold309.0  | 96,149    |
| Pyb12_177  | SNP | 12 | 83.7  | scaffold15.0   | 765,398   |
| Pyb12_178  | SNP | 12 | 83.7  | scaffold303.0  | 365,432   |
| Pyb12_179  | SNP | 12 | 84.0  | scaffold1037.0 | 37,136    |
| Pyb12_180  | SNP | 12 | 84.8  | scaffold15.0   | 741,890   |
| Pyb12_181  | SNP | 12 | 85.8  | scaffold402.0  | 293,037   |
| Pyb12_183  | SNP | 12 | 86.2  | scaffold402.0  | 211,725   |
| Pyb12_186  | SNP | 12 | 86.5  | scaffold402.0  | 308,720   |
| Pyb12_187  | SNP | 12 | 86.5  | scaffold402.0  | 282,380   |
| Pybd12_007 | SNP | 12 | 87.4  | scaffold827.0  | 126,368   |
| Pyb12_189  | SNP | 12 | 87.4  | scaffold319.0  | 313,034   |
| Pyb12_190  | SNP | 12 | 88.4  | scaffold319.0  | 71,742    |
| Pyb12_192  | SNP | 12 | 88.9  | scaffold478.0  | 162,864   |
| Pyb12_195  | SNP | 12 | 89.1  | scaffold478.0  | 144,911   |
| Pyb12_196  | SNP | 12 | 89.1  | scaffold319.0  | 71,784    |
| Pyb12_198  | SNP | 12 | 90.1  | scaffold204.0  | 420,107   |
| Pyb12_201  | SNP | 12 | 92.0  | scaffold395.1  | 9,127     |
| Pyb12_202  | SNP | 12 | 92.3  | scaffold889.0  | 149,182   |
| Pyb12_203  | SNP | 12 | 92.3  | scaffold395.1  | 57,387    |
| Pybd12_008 | SNP | 12 | 93.7  | scaffold379.0  | 103,319   |
| Pyb12_212  | SNP | 12 | 94.5  | scaffold445.0  | 309,265   |
| Pyd12_039  | SNP | 12 | 95.2  | scaffold89.0   | 616,278   |
| Pyb12_220  | SNP | 12 | 95.5  | scaffold953.0  | 39,162    |
| Pyb12_221  | SNP | 12 | 95.5  | scaffold1418.0 | 3,303     |
| Pyb12_223  | SNP | 12 | 95.5  | scaffold445.0  | 307,620   |
| Pyb12_228  | SNP | 12 | 95.6  | scaffold916.0  | 23,454    |
| Pyd12_043  | SNP | 12 | 96.3  | scaffold103.0  | 240,011   |
| Pyb12_234  | SNP | 12 | 97.2  | scaffold379.0  | 89,055    |
| Pyb12_235  | SNP | 12 | 97.2  | scaffold107.0  | 52,351    |
| Pyb12_238  | SNP | 12 | 97.5  | scaffold521.0  | 15,237    |
| Pyb12_242  | SNP | 12 | 98.6  | scaffold806.0  | 98,628    |
| Pyb12_243  | SNP | 12 | 98.7  | scaffold806.0  | 119,775   |
| Pyb12_245  | SNP | 12 | 98.7  | scaffold806.0  | 110,610   |
| Pyd12_049  | SNP | 12 | 99.2  | scaffold367.0  | 152,528   |
| Pyb12_248  | SNP | 12 | 100.1 | scaffold806.0  | 119,737   |
| Pyb12_251  | SNP | 12 | 100.9 | scaffold7.0    | 1,500,182 |
| Pyb12_254  | SNP | 12 | 101.0 | scaffold7.0    | 1,738,251 |
| Pyb12_255  | SNP | 12 | 101.0 | scaffold7.0    | 1,544,290 |
| Pyb12_259  | SNP | 12 | 101.5 | scaffold1052.0 | 18,325    |
| Pyb12_261  | SNP | 12 | 102.1 | scaffold7.0    | 1,261,545 |
| Pyb12_262  | SNP | 12 | 102.1 | scaffold7.0    | 1,312,747 |

---

|                |            |           |       |                |                     |
|----------------|------------|-----------|-------|----------------|---------------------|
| Pyb12_263      | SNP        | 12        | 102.1 | scaffold7.0    | 1,417,387           |
| <b>CH04g04</b> | <b>SSR</b> | <b>12</b> | 102.3 | scaffold7.0    | 1,304,491-1,304,656 |
| Pyb12_270      | SNP        | 12        | 103.2 | scaffold7.0    | 1,432,227           |
| Pyb12_271      | SNP        | 12        | 103.3 | scaffold7.0    | 1,423,574           |
| Pyd12_062      | SNP        | 12        | 114.2 | scaffold7.0    | 1,168,751           |
| Pyb12_279      | SNP        | 12        | 117.9 | scaffold266.0  | 509,715             |
| Pyb12_280      | SNP        | 12        | 117.9 | scaffold103.0  | 8,959               |
| Pyb12_281      | SNP        | 12        | 117.9 | scaffold103.0  | 120,169             |
| Pyb12_283      | SNP        | 12        | 118.0 | scaffold103.0  | 77,986              |
| Pyb12_286      | SNP        | 12        | 119.0 | scaffold103.0  | 146,951             |
| Pyb12_288      | SNP        | 12        | 120.2 | scaffold103.0  | 287,199             |
| Pyb12_291      | SNP        | 12        | 122.1 | scaffold103.0  | 234,316             |
| Pyb12_292      | SNP        | 12        | 122.1 | scaffold103.0  | 234,362             |
| Pyb12_296      | SNP        | 12        | 122.3 | scaffold228.0  | 187,663             |
| Pyb12_297      | SNP        | 12        | 122.3 | scaffold228.0  | 473,206             |
| Pyb12_298      | SNP        | 12        | 122.3 | scaffold228.0  | 385,813             |
| Pyb12_300      | SNP        | 12        | 122.3 | scaffold249.0  | 34,178              |
| Pyb12_301      | SNP        | 12        | 122.3 | scaffold228.0  | 592,736             |
| Pyb12_303      | SNP        | 12        | 122.3 | scaffold228.0  | 255,341             |
| Pyb12_304      | SNP        | 12        | 122.3 | scaffold228.0  | 77,129              |
| Pyb12_306      | SNP        | 12        | 122.3 | scaffold249.0  | 57,741              |
| Pyb12_307      | SNP        | 12        | 122.3 | scaffold228.0  | 578,970             |
| Pyb12_308      | SNP        | 12        | 122.3 | scaffold228.0  | 300,892             |
| Pyb12_312      | SNP        | 12        | 122.4 | scaffold228.0  | 237,918             |
| Pyb12_313      | SNP        | 12        | 122.4 | scaffold228.0  | 343,459             |
| Pyb12_314      | SNP        | 12        | 122.4 | scaffold228.0  | 424,109             |
| Pyb12_316      | SNP        | 12        | 122.7 | scaffold228.0  | 429,799             |
| <b>CH05d04</b> | <b>SSR</b> | <b>12</b> | 122.9 | scaffold128.0  | 177,666-177,843     |
| Pyb12_319      | SNP        | 12        | 123.3 | scaffold264.0  | 429,874             |
| Pyb12_320      | SNP        | 12        | 125.5 | scaffold128.0  | 246,691             |
| Pyb12_322      | SNP        | 12        | 125.5 | scaffold128.0  | 626,948             |
| Pyb12_324      | SNP        | 12        | 127.3 | scaffold143.0  | 694,330             |
| Pyb12_327      | SNP        | 12        | 127.7 | scaffold143.0  | 54,316              |
| Pyb12_328      | SNP        | 12        | 127.7 | scaffold1068.0 | 96,500              |
| Pyb12_329      | SNP        | 12        | 127.7 | scaffold1068.0 | 73,579              |
| Pyb12_332      | SNP        | 12        | 127.7 | scaffold128.0  | 66,324              |
| Pyb12_333      | SNP        | 12        | 127.7 | scaffold143.0  | 477,588             |
| Pyb12_334      | SNP        | 12        | 127.7 | scaffold143.0  | 8,700               |
| Pyb12_335      | SNP        | 12        | 127.8 | scaffold143.0  | 430,658             |
| Pyb12_336      | SNP        | 12        | 127.8 | scaffold143.0  | 690,406             |
| Pyb12_337      | SNP        | 12        | 127.8 | scaffold143.0  | 314,290             |
| Pyb12_338      | SNP        | 12        | 127.8 | scaffold1068.0 | 102,404             |
| Pyb12_340      | SNP        | 12        | 127.8 | scaffold143.0  | 603,558             |
| Pyb12_343      | SNP        | 12        | 127.8 | scaffold143.0  | 268,969             |

---

|           |     |    |       |               |                 |
|-----------|-----|----|-------|---------------|-----------------|
| Pyb12_346 | SNP | 12 | 128.6 | scaffold143.0 | 382,662         |
| Pyb12_348 | SNP | 12 | 128.6 | scaffold128.0 | 73,294          |
| CH02e02   | SSR | 13 | 0.0   | scaffold83.0  | 46,964-47,077   |
| AU223486  | SSR | 13 | 3.7   | scaffold51.0  | 882,852-883,061 |
| Pyb13_004 | SNP | 13 | 5.2   | scaffold174.0 | 36,243          |
| Pyb13_013 | SNP | 13 | 6.2   | scaffold19.0  | 503,063         |
| Pyb13_014 | SNP | 13 | 6.6   | scaffold535.0 | 90,022          |
| Pyb13_015 | SNP | 13 | 7.4   | scaffold48.0  | 408,192         |
| Pyb13_016 | SNP | 13 | 7.5   | scaffold48.0  | 556,005         |
| Pyb13_017 | SNP | 13 | 7.5   | scaffold48.0  | 597,558         |
| Pyb13_018 | SNP | 13 | 7.5   | scaffold48.0  | 429,617         |
| Pyb13_020 | SNP | 13 | 7.5   | scaffold48.0  | 408,135         |
| Pyb13_021 | SNP | 13 | 7.5   | scaffold48.0  | 670,478         |
| Pyb13_022 | SNP | 13 | 7.5   | scaffold48.0  | 616,913         |
| Pyb13_023 | SNP | 13 | 8.3   | scaffold48.0  | 991,369         |
| Pyb13_025 | SNP | 13 | 8.5   | scaffold48.0  | 1,114,353       |
| Pyb13_026 | SNP | 13 | 8.5   | scaffold48.0  | 998,771         |
| Pyb13_027 | SNP | 13 | 8.5   | scaffold48.0  | 1,060,170       |
| Pyb13_030 | SNP | 13 | 9.1   | scaffold451.0 | 72,791          |
| Pyb13_032 | SNP | 13 | 10.5  | scaffold83.0  | 28,453          |
| Pyb13_034 | SNP | 13 | 10.8  | scaffold51.0  | 176,215         |
| Pyb13_039 | SNP | 13 | 11.1  | scaffold83.0  | 793,295         |
| Pyb13_043 | SNP | 13 | 11.4  | scaffold83.0  | 517,238         |
| Pyb13_044 | SNP | 13 | 11.4  | scaffold66.0  | 788,076         |
| Pyb13_048 | SNP | 13 | 11.7  | scaffold83.0  | 290,830         |
| Pyb13_050 | SNP | 13 | 11.8  | scaffold83.0  | 371,861         |
| Pyb13_051 | SNP | 13 | 11.8  | scaffold83.0  | 508,053         |
| Pyb13_052 | SNP | 13 | 11.8  | scaffold83.0  | 569,977         |
| Pyb13_056 | SNP | 13 | 11.9  | scaffold83.0  | 863,257         |
| Pyb13_058 | SNP | 13 | 12.0  | scaffold83.0  | 540,151         |
| Pyb13_059 | SNP | 13 | 12.0  | scaffold83.0  | 546,781         |
| Pyb13_063 | SNP | 13 | 12.1  | scaffold83.0  | 490,425         |
| Pyb13_067 | SNP | 13 | 12.3  | scaffold83.0  | 67,232          |
| Pyb13_069 | SNP | 13 | 12.3  | scaffold83.0  | 13,039          |
| Pyb13_071 | SNP | 13 | 12.3  | scaffold51.0  | 190,104         |
| Pyb13_073 | SNP | 13 | 12.3  | scaffold83.0  | 290,801         |
| Pyb13_074 | SNP | 13 | 12.3  | scaffold83.0  | 67,423          |
| Pyb13_075 | SNP | 13 | 12.5  | scaffold451.0 | 3,473           |
| Pyb13_076 | SNP | 13 | 12.5  | scaffold83.0  | 28,507          |
| Pyb13_077 | SNP | 13 | 12.6  | scaffold51.0  | 84,093          |
| Pyb13_078 | SNP | 13 | 12.6  | scaffold51.0  | 1,530           |
| Pyb13_079 | SNP | 13 | 12.7  | scaffold51.0  | 692,690         |
| Pyb13_084 | SNP | 13 | 12.8  | scaffold51.0  | 552,117         |
| Pyb13_085 | SNP | 13 | 12.8  | scaffold51.0  | 667,857         |

---

|                   |            |           |      |               |           |
|-------------------|------------|-----------|------|---------------|-----------|
| Pyb13_086         | SNP        | 13        | 12.8 | scaffold51.0  | 588,472   |
| Pyb13_087         | SNP        | 13        | 12.9 | scaffold51.0  | 776,805   |
| Pyb13_088         | SNP        | 13        | 12.9 | scaffold51.0  | 534,459   |
| Pyb13_092         | SNP        | 13        | 13.1 | scaffold51.0  | 908,323   |
| Pyb13_094         | SNP        | 13        | 13.3 | scaffold451.0 | 249,688   |
| Pyb13_095         | SNP        | 13        | 13.3 | scaffold51.0  | 705,953   |
| Pyb13_096         | SNP        | 13        | 13.3 | scaffold451.0 | 281,046   |
| Pyb13_098         | SNP        | 13        | 13.4 | scaffold51.0  | 328,997   |
| Pyb13_100         | SNP        | 13        | 13.4 | scaffold51.0  | 342,565   |
| Pyb13_101         | SNP        | 13        | 13.4 | scaffold51.0  | 841,772   |
| Pyb13_102         | SNP        | 13        | 13.7 | scaffold51.0  | 817,661   |
| Pyb13_104         | SNP        | 13        | 13.8 | scaffold51.0  | 722,478   |
| Pyb13_105         | SNP        | 13        | 13.8 | scaffold51.0  | 491,416   |
| Pyb13_107         | SNP        | 13        | 14.0 | scaffold51.0  | 1,162,888 |
| Pyb13_109         | SNP        | 13        | 14.5 | scaffold51.0  | 338,342   |
| Pyb13_111         | SNP        | 13        | 15.7 | scaffold83.0  | 710,193   |
| Pyb13_112         | SNP        | 13        | 15.8 | scaffold83.0  | 706,668   |
| Pyb13_117         | SNP        | 13        | 19.2 | scaffold51.0  | 238,227   |
| Pyb13_118         | SNP        | 13        | 19.6 | scaffold66.0  | 839,668   |
| Pyd13_005         | SNP        | 13        | 36.1 | scaffold451.0 | 286,039   |
| Pyd13_006         | SNP        | 13        | 38.3 | scaffold51.0  | 884,159   |
| Pyd13_007         | SNP        | 13        | 38.4 | scaffold51.0  | 898,009   |
| Pyd13_010         | SNP        | 13        | 38.4 | scaffold22.0  | 555,429   |
| Pyd13_011         | SNP        | 13        | 38.4 | scaffold219.0 | 48,073    |
| Pyd13_012         | SNP        | 13        | 39.6 | scaffold735.0 | 854       |
| Pyd13_013         | SNP        | 13        | 39.6 | scaffold411.0 | 113,754   |
| Pyd13_014         | SNP        | 13        | 40.3 | scaffold22.0  | 907,551   |
| Pyd13_016         | SNP        | 13        | 42.9 | scaffold22.0  | 1,087,018 |
| Pyb13_130         | SNP        | 13        | 49.4 | scaffold83.0  | 874,148   |
| Pyb13_132         | SNP        | 13        | 49.8 | scaffold83.0  | 764,586   |
| Pyb13_133         | SNP        | 13        | 50.3 | scaffold66.0  | 809,196   |
| Pyb13_134         | SNP        | 13        | 50.5 | scaffold66.0  | 723,874   |
| Pyb13_135         | SNP        | 13        | 50.6 | scaffold66.0  | 800,977   |
| Pyb13_138         | SNP        | 13        | 50.9 | scaffold83.0  | 878,063   |
| Pyb13_143         | SNP        | 13        | 51.8 | scaffold693.0 | 195,392   |
| Pybd13_003        | SNP        | 13        | 53.5 | scaffold83.0  | 482,901   |
| <b>CTG1060382</b> | <b>SSR</b> | <b>13</b> | 54.9 | Not_anchored  | -         |
| Pyb13_163         | SNP        | 13        | 55.3 | scaffold693.0 | 191,132   |
| Pyb13_165         | SNP        | 13        | 56.2 | scaffold693.0 | 180,048   |
| Pyb13_168         | SNP        | 13        | 56.5 | scaffold439.0 | 104,638   |
| Pyb13_169         | SNP        | 13        | 56.7 | scaffold693.0 | 122,204   |
| Pyb13_170         | SNP        | 13        | 56.9 | scaffold439.0 | 119,503   |
| Pyd13_021         | SNP        | 13        | 59.0 | scaffold693.0 | 138,176   |
| Pyb13_172         | SNP        | 13        | 59.2 | scaffold274.0 | 342,179   |

|                   |            |           |      |               |                 |
|-------------------|------------|-----------|------|---------------|-----------------|
| Pybd13_006        | SNP        | 13        | 60.0 | scaffold28.0  | 1,183,049       |
| Pyb13_175         | SNP        | 13        | 61.0 | scaffold28.0  | 879,077         |
| Pyb13_176         | SNP        | 13        | 61.2 | scaffold28.0  | 898,364         |
| Pyb13_177         | SNP        | 13        | 61.2 | scaffold28.0  | 882,923         |
| Pyb13_178         | SNP        | 13        | 61.3 | scaffold28.0  | 883,841         |
| Pyb13_180         | SNP        | 13        | 61.5 | scaffold28.0  | 786,644         |
| Pyb13_181         | SNP        | 13        | 61.9 | scaffold28.0  | 515,819         |
| Pyb13_183         | SNP        | 13        | 62.2 | scaffold28.0  | 1,107,516       |
| <b>CTG1067935</b> | <b>SSR</b> | <b>13</b> | 62.6 | scaffold307.0 | 452,767-453,055 |
| Pyb13_186         | SNP        | 13        | 63.6 | scaffold28.0  | 969,518         |
| Pyb13_187         | SNP        | 13        | 63.6 | scaffold28.0  | 667,656         |
| Pyb13_188         | SNP        | 13        | 63.7 | scaffold28.0  | 800,499         |
| Pyb13_190         | SNP        | 13        | 63.8 | scaffold28.0  | 651,549         |
| Pyb13_191         | SNP        | 13        | 63.8 | scaffold28.0  | 661,625         |
| Pyb13_192         | SNP        | 13        | 63.9 | scaffold28.0  | 622,347         |
| Pyb13_193         | SNP        | 13        | 64.0 | scaffold221.0 | 14,985          |
| Pyb13_196         | SNP        | 13        | 65.4 | scaffold221.0 | 64,412          |
| Pyd13_025         | SNP        | 13        | 65.5 | scaffold83.0  | 92,217          |
| Pyd13_026         | SNP        | 13        | 65.6 | scaffold83.0  | 458,735         |
| Pyb13_198         | SNP        | 13        | 65.7 | scaffold221.0 | 226,314         |
| Pyb13_199         | SNP        | 13        | 65.8 | scaffold221.0 | 108,075         |
| Pyb13_200         | SNP        | 13        | 66.2 | scaffold188.0 | 662,015         |
| Pyd13_028         | SNP        | 13        | 66.9 | scaffold51.0  | 144,775         |
| Pyb13_202         | SNP        | 13        | 67.1 | scaffold979.0 | 10,387          |
| Pyb13_205         | SNP        | 13        | 67.5 | scaffold188.0 | 28,583          |
| Pyb13_207         | SNP        | 13        | 67.9 | scaffold188.0 | 25,254          |
| Pyb13_208         | SNP        | 13        | 68.2 | scaffold221.0 | 352,622         |
| Pyb13_210         | SNP        | 13        | 68.3 | scaffold188.0 | 164,063         |
| Pyb13_211         | SNP        | 13        | 68.3 | scaffold221.0 | 238,495         |
| Pybd13_007        | SNP        | 13        | 68.5 | scaffold274.0 | 408,706         |
| Pyd13_029         | SNP        | 13        | 70.7 | scaffold22.0  | 1,405,119       |
| Pyd13_033         | SNP        | 13        | 77.0 | scaffold22.0  | 1,251,146       |
| Pyd13_035         | SNP        | 13        | 79.9 | scaffold116.0 | 278,064         |
| Pybd13_008        | SNP        | 13        | 80.5 | scaffold116.0 | 323,051         |
| Pybd13_009        | SNP        | 13        | 81.9 | scaffold22.0  | 539,762         |
| Pybd13_010        | SNP        | 13        | 83.8 | scaffold22.0  | 298,455         |
| Pyd13_037         | SNP        | 13        | 85.5 | scaffold648.0 | 101,302         |
| <b>NB133a</b>     | <b>SSR</b> | <b>13</b> | 86.0 | scaffold411.0 | 57,798-58,078   |
| Pybd13_011        | SNP        | 13        | 86.5 | scaffold22.0  | 969,715         |
| Pyd13_041         | SNP        | 13        | 86.6 | scaffold129.0 | 13,321          |
| Pybd13_013        | SNP        | 13        | 88.1 | scaffold116.0 | 83,743          |
| Pyb13_219         | SNP        | 13        | 90.8 | scaffold116.0 | 186,600         |
| Pybd13_014        | SNP        | 13        | 90.8 | scaffold116.0 | 19,071          |
| Pybd13_015        | SNP        | 13        | 92.3 | scaffold116.0 | 124,640         |

|               |            |           |            |                      |                        |
|---------------|------------|-----------|------------|----------------------|------------------------|
| Pyb13_224     | SNP        | 13        | 92.5       | scaffold22.0         | 236,801                |
| Pyb13_226     | SNP        | 13        | 93.0       | scaffold22.0         | 749,617                |
| Pyb13_229     | SNP        | 13        | 93.1       | scaffold22.0         | 463,986                |
| Pyb13_232     | SNP        | 13        | 93.3       | scaffold22.0         | 1,059,493              |
| Pyb13_237     | SNP        | 13        | 93.7       | scaffold22.0         | 398,014                |
| Pyb13_242     | SNP        | 13        | 94.6       | scaffold22.0         | 1,172,014              |
| Pyb13_243     | SNP        | 13        | 94.9       | scaffold22.0         | 1,207,402              |
| Pyb13_244     | SNP        | 13        | 95.0       | scaffold22.0         | 1,147,145              |
| Pybd13_017    | SNP        | 13        | 97.5       | scaffold22.0         | 1,050,986              |
| Pyd13_050     | SNP        | 13        | 98.9       | scaffold219.0        | 203,390                |
| Pyb13_250     | SNP        | 13        | 99.3       | scaffold221.0        | 155,743                |
| Pyb13_251     | SNP        | 13        | 100.1      | scaffold221.0        | 226,359                |
| Pyb13_252     | SNP        | 13        | 100.1      | scaffold221.0        | 89,814                 |
| Pyb13_253     | SNP        | 13        | 102.5      | scaffold28.0         | 983,678                |
| Pyd13_054     | SNP        | 13        | 104.1      | scaffold819.0        | 30,365                 |
| Pyb13_255     | SNP        | 13        | 105.5      | scaffold28.0         | 1,314,579              |
| Pyb13_256     | SNP        | 13        | 105.5      | scaffold28.0         | 1,147,394              |
| Pyb13_257     | SNP        | 13        | 105.7      | scaffold274.0        | 260,626                |
| Pyb13_258     | SNP        | 13        | 106.2      | scaffold28.0         | 1,331,502              |
| Pyb13_260     | SNP        | 13        | 106.3      | scaffold274.0        | 293,961                |
| Pyb13_262     | SNP        | 13        | 106.7      | scaffold28.0         | 1,337,567              |
| Pyb13_273     | SNP        | 13        | 116.8      | scaffold66.0         | 714,490                |
| Pyb13_276     | SNP        | 13        | 121.7      | scaffold48.0         | 644,206                |
| Pyb13_277     | SNP        | 13        | 121.7      | scaffold48.0         | 560,792                |
| Pyb14_004     | SNP        | 14        | 0.0        | scaffold142.0        | 415,114                |
| <b>NH004a</b> | <b>SSR</b> | <b>14</b> | <b>0.2</b> | <b>scaffold326.0</b> | <b>128,156-128,258</b> |
| Pybd14_001    | SNP        | 14        | 6.8        | scaffold142.0        | 761,632                |
| Pybd14_002    | SNP        | 14        | 8.1        | scaffold17.0         | 302,538                |
| Pybd14_003    | SNP        | 14        | 8.6        | scaffold25.0         | 759,357                |
| Pyb14_006     | SNP        | 14        | 9.0        | scaffold17.0         | 128,695                |
| Pyb14_007     | SNP        | 14        | 10.0       | scaffold641.0        | 140,740                |
| Pyb14_010     | SNP        | 14        | 10.3       | scaffold421.0        | 377,455                |
| Pyb14_011     | SNP        | 14        | 10.4       | scaffold17.0         | 316,992                |
| Pyb14_012     | SNP        | 14        | 10.5       | scaffold17.0         | 391,785                |
| Pyb14_013     | SNP        | 14        | 10.5       | scaffold17.0         | 476,600                |
| Pyb14_014     | SNP        | 14        | 10.5       | scaffold17.0         | 453,135                |
| Pyb14_015     | SNP        | 14        | 10.5       | scaffold17.0         | 263,268                |
| Pyb14_016     | SNP        | 14        | 10.5       | scaffold17.0         | 246,866                |
| Pyb14_023     | SNP        | 14        | 11.1       | scaffold17.0         | 213,135                |
| Pyb14_025     | SNP        | 14        | 11.5       | scaffold421.0        | 192,153                |
| Pybd14_004    | SNP        | 14        | 12.1       | scaffold17.0         | 369,839                |
| Pybd14_005    | SNP        | 14        | 12.4       | scaffold17.0         | 418,250                |
| Pybd14_006    | SNP        | 14        | 12.4       | scaffold17.0         | 418,299                |
| Pyb14_027     | SNP        | 14        | 12.8       | scaffold25.0         | 275,351                |

|                |            |           |             |                |               |
|----------------|------------|-----------|-------------|----------------|---------------|
| Pyb14_028      | SNP        | 14        | 12.9        | scaffold25.0   | 1,115,747     |
| Pyb14_029      | SNP        | 14        | 13.1        | scaffold25.0   | 778,409       |
| Pyb14_039      | SNP        | 14        | 13.6        | scaffold142.0  | 82,134        |
| Pyb14_042      | SNP        | 14        | 13.7        | scaffold25.0   | 166,679       |
| Pyb14_045      | SNP        | 14        | 14.1        | scaffold291.0  | 443,548       |
| Pyb14_046      | SNP        | 14        | 14.4        | scaffold25.0   | 144,307       |
| Pyb14_047      | SNP        | 14        | 14.4        | scaffold142.0  | 578,887       |
| Pyb14_050      | SNP        | 14        | 14.5        | scaffold25.0   | 584,643       |
| Pyb14_051      | SNP        | 14        | 15.3        | scaffold25.0   | 1,151,847     |
| Pyb14_056      | SNP        | 14        | 18.6        | scaffold1141.0 | 75,186        |
| <b>CH05g07</b> | <b>SSR</b> | <b>14</b> | <b>18.8</b> | scaffold548.0  | 27-218        |
| Pyb14_058      | SNP        | 14        | 19.3        | scaffold548.0  | 77,872        |
| Pyb14_059      | SNP        | 14        | 19.3        | scaffold53.0   | 226,442       |
| Pyb14_061      | SNP        | 14        | 19.4        | scaffold991.0  | 99,902        |
| Pyb14_062      | SNP        | 14        | 19.4        | scaffold548.0  | 80,428        |
| Pyb14_063      | SNP        | 14        | 19.4        | scaffold991.0  | 99,712        |
| <b>EMPe108</b> | <b>SSR</b> | <b>14</b> | <b>19.5</b> | scaffold991.0  | 33,573-33,719 |
| Pybd14_008     | SNP        | 14        | 20.8        | scaffold17.0   | 154,569       |
| Pybd14_010     | SNP        | 14        | 23.3        | scaffold42.0   | 427,952       |
| Pybd14_011     | SNP        | 14        | 31.2        | scaffold374.0  | 125,405       |
| Pyb14_069      | SNP        | 14        | 34.9        | scaffold421.0  | 337,059       |
| Pyb14_071      | SNP        | 14        | 35.4        | scaffold1444.0 | 9,808         |
| Pyb14_075      | SNP        | 14        | 36.4        | scaffold1444.0 | 5,149         |
| Pybd14_014     | SNP        | 14        | 38.6        | scaffold432.0  | 200,461       |
| Pyb14_078      | SNP        | 14        | 40.2        | scaffold42.0   | 513,689       |
| Pyb14_079      | SNP        | 14        | 40.3        | scaffold42.0   | 384,625       |
| Pyd14_019      | SNP        | 14        | 40.7        | scaffold107.0  | 675,067       |
| Pybd14_015     | SNP        | 14        | 40.9        | scaffold107.0  | 670,199       |
| Pyb14_083      | SNP        | 14        | 41.3        | scaffold1526.0 | 3,989         |
| Pyb14_092      | SNP        | 14        | 42.0        | scaffold1056.0 | 90,759        |
| Pyb14_093      | SNP        | 14        | 42.0        | scaffold799.0  | 146,876       |
| Pyb14_097      | SNP        | 14        | 42.0        | scaffold799.0  | 108,755       |
| Pyb14_102      | SNP        | 14        | 42.9        | scaffold799.0  | 101,343       |
| Pyb14_103      | SNP        | 14        | 42.9        | scaffold1501.0 | 5,696         |
| Pyb14_105      | SNP        | 14        | 42.9        | scaffold799.0  | 146,493       |
| Pyb14_111      | SNP        | 14        | 43.7        | scaffold107.0  | 328,287       |
| Pyb14_114      | SNP        | 14        | 44.1        | scaffold107.0  | 340,622       |
| Pyb14_115      | SNP        | 14        | 45.2        | scaffold53.0   | 232,610       |
| Pybd14_018     | SNP        | 14        | 61.5        | scaffold168.0  | 87,913        |
| Pyb14_124      | SNP        | 14        | 66.6        | scaffold75.0   | 478,085       |
| Pyb14_129      | SNP        | 14        | 67.1        | scaffold736.0  | 89,940        |
| Pyb14_134      | SNP        | 14        | 67.5        | scaffold431.0  | 383,945       |
| Pybd14_021     | SNP        | 14        | 68.9        | scaffold736.0  | 60,332        |
| Pyb14_141      | SNP        | 14        | 69.3        | scaffold934.0  | 48,774        |



|                |            |           |      |                |                     |
|----------------|------------|-----------|------|----------------|---------------------|
| <b>CH04f06</b> | <b>SSR</b> | <b>14</b> | 69.5 | scaffold987.0  | 97,377-97,534       |
| Pyb14_145      | SNP        | 14        | 69.6 | scaffold987.0  | 113,621             |
| Pyb14_153      | SNP        | 14        | 70.0 | scaffold811.0  | 44,759              |
| Pyb14_163      | SNP        | 14        | 70.8 | scaffold272.0  | 54,686              |
| Pyb14_165      | SNP        | 14        | 71.0 | scaffold859.0  | 164,737             |
| Pyb14_168      | SNP        | 14        | 71.1 | scaffold859.0  | 98,157              |
| Pyb14_169      | SNP        | 14        | 71.3 | scaffold934.0  | 70,003              |
| Pyb14_172      | SNP        | 14        | 71.8 | scaffold75.0   | 704,330             |
| Pyb14_176      | SNP        | 14        | 74.0 | scaffold744.0  | 41,903              |
| Pyd14_031      | SNP        | 14        | 74.1 | scaffold626.0  | 238,858             |
| <b>NH001c</b>  | <b>SSR</b> | <b>14</b> | 74.1 | scaffold744.0  | 31,586-31,706       |
| Pyb14_177      | SNP        | 14        | 74.2 | scaffold413.0  | 406,595             |
| Pyb14_178      | SNP        | 14        | 74.2 | scaffold168.0  | 403,757             |
| Pyd14_032      | SNP        | 14        | 74.6 | scaffold626.0  | 93,334              |
| Pyb14_180      | SNP        | 14        | 74.9 | scaffold168.0  | 253,631             |
| Pyb14_182      | SNP        | 14        | 75.3 | scaffold168.0  | 162,658             |
| <b>CH05g11</b> | <b>SSR</b> | <b>14</b> | 75.5 | scaffold168.0  | 197,526-197,749     |
| <b>CH04c07</b> | <b>SSR</b> | <b>14</b> | 75.7 | scaffold379.0  | 362,773-362,928     |
| Pyd14_035      | SNP        | 14        | 75.8 | scaffold431.0  | 245,336             |
| Pybd14_023     | SNP        | 14        | 76.2 | scaffold106.0  | 153,818             |
| Pyd14_036      | SNP        | 14        | 79.0 | scaffold168.0  | 308,443             |
| Pyb14_184      | SNP        | 14        | 84.7 | scaffold44.2   | 434,639             |
| Pyb14_186      | SNP        | 14        | 85.0 | scaffold44.2   | 579,103             |
| Pyb14_187      | SNP        | 14        | 85.2 | scaffold74.0   | 860,145             |
| Pyb14_189      | SNP        | 14        | 85.7 | scaffold44.2   | 523,914             |
| Pyb14_191      | SNP        | 14        | 85.8 | scaffold74.0   | 331,926             |
| Pyb14_192      | SNP        | 14        | 85.8 | scaffold44.2   | 550,829             |
| Pyb14_193      | SNP        | 14        | 85.9 | scaffold44.2   | 456,448             |
| Pyb14_194      | SNP        | 14        | 86.4 | scaffold1265.0 | 44,376              |
| Pyb14_195      | SNP        | 14        | 86.6 | scaffold74.0   | 545,858             |
| Pyb14_198      | SNP        | 14        | 86.8 | scaffold74.0   | 868,201             |
| Pyb14_199      | SNP        | 14        | 86.8 | scaffold74.0   | 670,201             |
| Pyb14_200      | SNP        | 14        | 86.8 | scaffold74.0   | 855,313             |
| Pyb14_201      | SNP        | 14        | 86.9 | scaffold74.0   | 611,005             |
| Pyb14_202      | SNP        | 14        | 87.0 | scaffold74.0   | 447,508             |
| Pyb14_204      | SNP        | 14        | 87.2 | scaffold74.0   | 677,516             |
| Pyb14_207      | SNP        | 14        | 93.4 | scaffold14.0   | 1,363,717           |
| Pyb14_208      | SNP        | 14        | 93.5 | scaffold14.0   | 1,662,276           |
| Pyb14_209      | SNP        | 14        | 93.5 | scaffold14.0   | 866,553             |
| Pyb14_210      | SNP        | 14        | 93.5 | scaffold14.0   | 1,070,387           |
| <b>CH03a03</b> | <b>SSR</b> | <b>14</b> | 93.7 | scaffold14.0   | 1,072,634-1,072,230 |
| Pyb14_211      | SNP        | 14        | 94.1 | scaffold14.0   | 1,372,097           |
| Pyb14_215      | SNP        | 14        | 97.7 | scaffold82.0   | 989,292             |
| Pyb14_217      | SNP        | 14        | 99.5 | scaffold82.0   | 586,069             |

---

|            |     |    |       |               |           |
|------------|-----|----|-------|---------------|-----------|
| Pyb14_219  | SNP | 14 | 99.9  | scaffold82.0  | 596,453   |
| Pyb14_220  | SNP | 14 | 99.9  | scaffold82.0  | 550,704   |
| Pyb14_221  | SNP | 14 | 99.9  | scaffold82.0  | 598,367   |
| Pyb14_222  | SNP | 14 | 99.9  | scaffold82.0  | 459,769   |
| Pyb14_223  | SNP | 14 | 100.0 | scaffold82.0  | 676,685   |
| Pyb14_224  | SNP | 14 | 100.3 | scaffold82.0  | 471,389   |
| Pyb14_226  | SNP | 14 | 100.3 | scaffold82.0  | 225,832   |
| Pyb14_227  | SNP | 14 | 100.4 | scaffold82.0  | 202,439   |
| Pyb14_228  | SNP | 14 | 100.4 | scaffold82.0  | 131,297   |
| Pyb14_231  | SNP | 14 | 100.6 | scaffold82.0  | 162,203   |
| Pyb14_235  | SNP | 14 | 100.7 | scaffold82.0  | 95,721    |
| Pyb14_238  | SNP | 14 | 101.1 | scaffold82.0  | 345,431   |
| Pyb14_242  | SNP | 14 | 101.5 | scaffold82.0  | 596,514   |
| Pyb14_246  | SNP | 14 | 102.0 | scaffold82.0  | 369,453   |
| Pybd14_025 | SNP | 14 | 102.7 | scaffold616.0 | 260,680   |
| Pyd14_045  | SNP | 14 | 108.0 | scaffold82.0  | 598,327   |
| Pyd14_047  | SNP | 14 | 109.9 | scaffold14.0  | 474,492   |
| Pyd14_049  | SNP | 14 | 110.0 | scaffold14.0  | 632,674   |
| Pyd14_051  | SNP | 14 | 113.6 | scaffold14.0  | 907,649   |
| Pybd14_027 | SNP | 14 | 119.7 | scaffold14.0  | 1,178,816 |
| Pyb14_247  | SNP | 14 | 120.6 | scaffold82.0  | 447,966   |
| Pyb14_248  | SNP | 14 | 120.6 | scaffold82.0  | 596,282   |
| Pyb14_249  | SNP | 14 | 121.2 | scaffold82.0  | 928,263   |
| Pyb14_254  | SNP | 14 | 122.4 | scaffold82.0  | 965,306   |
| Pyd14_058  | SNP | 14 | 122.9 | scaffold106.0 | 111,774   |
| Pyb14_258  | SNP | 14 | 123.8 | scaffold14.0  | 673,278   |
| Pyb14_260  | SNP | 14 | 125.5 | scaffold14.0  | 880,516   |
| Pyb14_261  | SNP | 14 | 125.6 | scaffold14.0  | 1,415,562 |
| Pyb14_262  | SNP | 14 | 125.7 | scaffold14.0  | 1,661,030 |
| Pyb14_267  | SNP | 14 | 126.3 | scaffold106.0 | 695,970   |
| Pyd14_059  | SNP | 14 | 126.6 | scaffold74.0  | 631,647   |
| Pyd14_060  | SNP | 14 | 126.7 | scaffold74.0  | 944,808   |
| Pyb14_271  | SNP | 14 | 128.5 | scaffold14.0  | 1,212,814 |
| Pybd14_028 | SNP | 14 | 128.6 | scaffold14.0  | 1,084,448 |
| Pyb14_273  | SNP | 14 | 128.7 | scaffold14.0  | 807,834   |
| Pyb14_274  | SNP | 14 | 128.8 | scaffold14.0  | 1,157,487 |
| Pyb14_275  | SNP | 14 | 128.8 | scaffold14.0  | 1,191,352 |
| Pyb14_276  | SNP | 14 | 128.8 | scaffold708.0 | 2,058     |
| Pyb14_282  | SNP | 14 | 129.1 | scaffold708.0 | 13,217    |
| Pyb14_284  | SNP | 14 | 129.4 | scaffold14.0  | 921,638   |
| Pyb14_294  | SNP | 14 | 130.6 | scaffold106.0 | 889,747   |
| Pyb14_297  | SNP | 14 | 131.0 | scaffold106.0 | 562,948   |
| Pyb14_298  | SNP | 14 | 131.0 | scaffold106.0 | 691,339   |
| Pyb14_300  | SNP | 14 | 131.4 | scaffold106.0 | 558,077   |

---

|                |            |           |       |               |                 |
|----------------|------------|-----------|-------|---------------|-----------------|
| Pyb14_301      | SNP        | 14        | 131.6 | scaffold106.0 | 682,793         |
| Pyb14_302      | SNP        | 14        | 131.8 | scaffold106.0 | 865,027         |
| Pyb14_305      | SNP        | 14        | 133.6 | scaffold106.0 | 501,210         |
| Pyb14_307      | SNP        | 14        | 133.6 | scaffold106.0 | 132,413         |
| Pyb14_310      | SNP        | 14        | 133.7 | scaffold106.0 | 155,865         |
| Pyb14_311      | SNP        | 14        | 133.7 | scaffold106.0 | 338,010         |
| <b>CH05d03</b> | <b>SSR</b> | <b>14</b> | 133.9 | scaffold106.0 | 332,515-332,681 |
| Pyb14_317      | SNP        | 14        | 138.0 | scaffold744.0 | 2,576           |
| Pyb14_318      | SNP        | 14        | 138.0 | scaffold744.0 | 31,271          |
| Pyb14_319      | SNP        | 14        | 138.0 | scaffold168.0 | 550,001         |
| Pyd14_066      | SNP        | 14        | 139.2 | scaffold596.0 | 2,502           |
| Pyd14_067      | SNP        | 14        | 139.2 | scaffold811.0 | 104,198         |
| Pyb14_321      | SNP        | 14        | 139.6 | scaffold744.0 | 134,598         |
| Pyb14_323      | SNP        | 14        | 140.4 | scaffold75.0  | 701,807         |
| Pyb14_324      | SNP        | 14        | 140.7 | scaffold75.0  | 637,784         |
| Pyd14_075      | SNP        | 14        | 140.9 | scaffold431.0 | 392,192         |
| Pyb14_325      | SNP        | 14        | 141.0 | scaffold75.0  | 471,941         |
| Pyb14_329      | SNP        | 14        | 141.4 | scaffold75.0  | 719,666         |
| Pyb14_330      | SNP        | 14        | 141.4 | scaffold626.0 | 97,832          |
| Pyb14_331      | SNP        | 14        | 141.5 | scaffold75.0  | 918,037         |
| Pyb14_333      | SNP        | 14        | 141.5 | scaffold75.0  | 880,207         |
| Pyd14_076      | SNP        | 14        | 142.7 | scaffold950.0 | 146,683         |
| Pyb14_339      | SNP        | 14        | 147.1 | scaffold272.0 | 139,421         |
| Pyb14_344      | SNP        | 14        | 156.1 | scaffold53.0  | 226,411         |
| Pyb14_345      | SNP        | 14        | 156.1 | scaffold814.0 | 172,978         |
| Pyb14_351      | SNP        | 14        | 156.8 | scaffold42.0  | 503,796         |
| Pyb14_355      | SNP        | 14        | 158.5 | scaffold548.0 | 2,259           |
| Pyb15_005      | SNP        | 15        | 0.0   | scaffold23.0  | 1,085,527       |
| Pyb15_006      | SNP        | 15        | 0.0   | scaffold23.0  | 1,152,388       |
| Pyb15_007      | SNP        | 15        | 0.1   | scaffold23.0  | 823,975         |
| Pyb15_008      | SNP        | 15        | 0.9   | scaffold23.0  | 1,177,121       |
| Pyb15_009      | SNP        | 15        | 1.1   | scaffold23.0  | 663,709         |
| Pyd15_002      | SNP        | 15        | 7.0   | scaffold13.0  | 640,507         |
| Pyd15_003      | SNP        | 15        | 7.1   | scaffold13.0  | 806,077         |
| Pyd15_004      | SNP        | 15        | 7.1   | scaffold13.0  | 769,025         |
| Pyd15_006      | SNP        | 15        | 10.2  | scaffold13.0  | 1,107,560       |
| Pyb15_014      | SNP        | 15        | 11.2  | scaffold360.0 | 385,187         |
| Pyb15_017      | SNP        | 15        | 11.4  | scaffold46.0  | 1,181,748       |
| Pybd15_001     | SNP        | 15        | 12.1  | scaffold46.0  | 371,529         |
| Pyb15_018      | SNP        | 15        | 12.1  | scaffold401.0 | 331,831         |
| Pyb15_022      | SNP        | 15        | 12.2  | scaffold314.0 | 421,738         |
| Pyb15_029      | SNP        | 15        | 14.0  | scaffold159.0 | 88,115          |
| Pyb15_031      | SNP        | 15        | 17.6  | scaffold154.0 | 622,574         |
| Pyb15_032      | SNP        | 15        | 18.1  | scaffold154.0 | 197,932         |

---

|            |     |    |      |               |           |
|------------|-----|----|------|---------------|-----------|
| Pyb15_033  | SNP | 15 | 18.2 | scaffold154.0 | 322,417   |
| Pyd15_007  | SNP | 15 | 18.2 | scaffold3.0   | 1,883,023 |
| Pybd15_003 | SNP | 15 | 18.7 | scaffold3.0   | 1,055,127 |
| Pyb15_035  | SNP | 15 | 18.7 | scaffold3.0   | 350,192   |
| Pyb15_036  | SNP | 15 | 18.7 | scaffold3.0   | 973,262   |
| Pyb15_037  | SNP | 15 | 18.9 | scaffold13.0  | 47,157    |
| Pyb15_038  | SNP | 15 | 19.3 | scaffold3.0   | 531,817   |
| Pyb15_039  | SNP | 15 | 19.3 | scaffold3.0   | 844,414   |
| Pyb15_040  | SNP | 15 | 19.4 | scaffold3.0   | 370,430   |
| Pyb15_042  | SNP | 15 | 19.5 | scaffold3.0   | 248,583   |
| Pyb15_043  | SNP | 15 | 19.5 | scaffold3.0   | 757,832   |
| Pyb15_044  | SNP | 15 | 19.6 | scaffold3.0   | 622,669   |
| Pyb15_046  | SNP | 15 | 19.9 | scaffold3.0   | 1,685,288 |
| Pyb15_047  | SNP | 15 | 19.9 | scaffold3.0   | 1,513,215 |
| Pyb15_048  | SNP | 15 | 20.1 | scaffold154.0 | 178,073   |
| Pyb15_051  | SNP | 15 | 20.2 | scaffold3.0   | 3,015,034 |
| Pyb15_052  | SNP | 15 | 20.4 | scaffold3.0   | 1,382,031 |
| Pyb15_053  | SNP | 15 | 20.5 | scaffold3.0   | 1,262,065 |
| Pyb15_054  | SNP | 15 | 20.5 | scaffold3.0   | 1,382,074 |
| Pybd15_004 | SNP | 15 | 20.8 | scaffold13.0  | 409,257   |
| Pyb15_058  | SNP | 15 | 21.2 | scaffold13.0  | 54,837    |
| Pyb15_059  | SNP | 15 | 21.2 | scaffold13.0  | 646,279   |
| Pyb15_060  | SNP | 15 | 21.2 | scaffold13.0  | 54,890    |
| Pyb15_061  | SNP | 15 | 21.6 | scaffold13.0  | 892,986   |
| Pyb15_062  | SNP | 15 | 21.6 | scaffold13.0  | 1,148,822 |
| Pyb15_064  | SNP | 15 | 21.8 | scaffold3.0   | 2,197,808 |
| Pyb15_065  | SNP | 15 | 21.8 | scaffold3.0   | 2,917,983 |
| Pyb15_066  | SNP | 15 | 21.9 | scaffold3.0   | 3,777,776 |
| Pyb15_067  | SNP | 15 | 21.9 | scaffold3.0   | 3,005,051 |
| Pyb15_068  | SNP | 15 | 21.9 | scaffold3.0   | 3,002,968 |
| Pyb15_069  | SNP | 15 | 21.9 | scaffold3.0   | 2,945,737 |
| Pyb15_070  | SNP | 15 | 21.9 | scaffold3.0   | 2,299,621 |
| Pyb15_071  | SNP | 15 | 21.9 | scaffold3.0   | 3,150,929 |
| Pyb15_072  | SNP | 15 | 21.9 | scaffold3.0   | 3,028,780 |
| Pyb15_073  | SNP | 15 | 22.0 | scaffold3.0   | 2,495,866 |
| Pyb15_075  | SNP | 15 | 22.0 | scaffold3.0   | 2,731,572 |
| Pyb15_077  | SNP | 15 | 22.0 | scaffold3.0   | 3,300,534 |
| Pyb15_079  | SNP | 15 | 22.0 | scaffold3.0   | 2,864,271 |
| Pyb15_081  | SNP | 15 | 22.3 | scaffold3.0   | 2,715,636 |
| Pyd15_014  | SNP | 15 | 22.3 | scaffold3.0   | 833,588   |
| Pyb15_082  | SNP | 15 | 22.4 | scaffold13.0  | 90,977    |
| Pyb15_084  | SNP | 15 | 22.6 | scaffold13.0  | 542,857   |
| Pyb15_085  | SNP | 15 | 22.6 | scaffold13.0  | 978,039   |
| Pyb15_086  | SNP | 15 | 22.6 | scaffold13.0  | 47,099    |

---

|                 |            |           |      |               |                     |
|-----------------|------------|-----------|------|---------------|---------------------|
| Pyb15_088       | SNP        | 15        | 22.6 | scaffold13.0  | 962,989             |
| Pyb15_089       | SNP        | 15        | 22.6 | scaffold13.0  | 507,700             |
| Pyb15_090       | SNP        | 15        | 22.6 | scaffold13.0  | 49,131              |
| Pyb15_091       | SNP        | 15        | 22.6 | scaffold13.0  | 979,542             |
| Pyb15_093       | SNP        | 15        | 22.8 | scaffold13.0  | 905,388             |
| Pyb15_094       | SNP        | 15        | 22.8 | scaffold13.0  | 1,021,274           |
| Pyb15_095       | SNP        | 15        | 22.8 | scaffold13.0  | 139,791             |
| <b>NH027a</b>   | <b>SSR</b> | <b>15</b> | 22.9 | scaffold3.0   | 3,734,538-3,734,677 |
| Pyb15_099       | SNP        | 15        | 23.2 | scaffold3.0   | 2,646,902           |
| Pyb15_100       | SNP        | 15        | 23.3 | scaffold3.0   | 2,188,079           |
| Pyb15_104       | SNP        | 15        | 23.5 | scaffold3.0   | 2,884,231           |
| Pyb15_105       | SNP        | 15        | 23.5 | scaffold3.0   | 2,989,218           |
| Pyb15_109       | SNP        | 15        | 23.8 | scaffold3.0   | 2,945,771           |
| Pyb15_112       | SNP        | 15        | 24.2 | scaffold13.0  | 317,936             |
| Pyb15_113       | SNP        | 15        | 24.4 | scaffold13.0  | 1,038,983           |
| Pyb15_114       | SNP        | 15        | 24.5 | scaffold13.0  | 901,238             |
| Pyb15_115       | SNP        | 15        | 24.8 | scaffold3.0   | 2,519,666           |
| <b>CH02d10b</b> | <b>SSR</b> | <b>15</b> | 28.1 | scaffold159.0 | 127,400-127,555     |
| Pyd15_030       | SNP        | 15        | 33.6 | scaffold3.0   | 3,090,304           |
| Pybd15_005      | SNP        | 15        | 34.5 | scaffold3.0   | 3,090,257           |
| Pyb15_122       | SNP        | 15        | 35.1 | scaffold3.0   | 3,457,150           |
| Pyb15_124       | SNP        | 15        | 35.4 | scaffold3.0   | 3,107,251           |
| Pybd15_006      | SNP        | 15        | 35.6 | scaffold3.0   | 3,010,377           |
| Pyb15_128       | SNP        | 15        | 35.8 | scaffold3.0   | 1,979,770           |
| Pyb15_129       | SNP        | 15        | 35.8 | scaffold3.0   | 2,623,306           |
| Pyb15_130       | SNP        | 15        | 35.8 | scaffold3.0   | 3,248,011           |
| Pyb15_131       | SNP        | 15        | 35.9 | scaffold3.0   | 1,874,222           |
| Pyb15_132       | SNP        | 15        | 35.9 | scaffold3.0   | 2,124,196           |
| Pyb15_133       | SNP        | 15        | 35.9 | scaffold3.0   | 2,340,384           |
| Pyd15_035       | SNP        | 15        | 36.2 | scaffold3.0   | 2,822,770           |
| Pyb15_137       | SNP        | 15        | 36.3 | scaffold3.0   | 2,344,317           |
| Pyb15_139       | SNP        | 15        | 36.7 | scaffold3.0   | 2,178,736           |
| Pyb15_140       | SNP        | 15        | 36.9 | scaffold3.0   | 1,385,769           |
| Pyb15_144       | SNP        | 15        | 37.5 | scaffold3.0   | 1,761,748           |
| Pyb15_145       | SNP        | 15        | 37.7 | scaffold3.0   | 614,733             |
| Pyb15_146       | SNP        | 15        | 37.8 | scaffold3.0   | 318,727             |
| Pyb15_147       | SNP        | 15        | 37.8 | scaffold154.0 | 345,934             |
| Pyb15_148       | SNP        | 15        | 37.8 | scaffold3.0   | 662,527             |
| Pyb15_150       | SNP        | 15        | 37.9 | scaffold154.0 | 354,737             |
| Pyb15_153       | SNP        | 15        | 38.3 | scaffold3.0   | 625,074             |
| Pybd15_007      | SNP        | 15        | 38.9 | scaffold3.0   | 1,235,461           |
| Pyb15_155       | SNP        | 15        | 39.2 | scaffold154.0 | 651,199             |
| <b>CH03b06</b>  | <b>SSR</b> | <b>15</b> | 39.4 | scaffold154.0 | 401,346-400,998     |
| Pyb15_157       | SNP        | 15        | 39.7 | scaffold154.0 | 413,775             |

---

|            |     |    |      |               |           |
|------------|-----|----|------|---------------|-----------|
| Pyb15_158  | SNP | 15 | 39.7 | scaffold154.0 | 489,599   |
| Pyb15_159  | SNP | 15 | 39.7 | scaffold154.0 | 591,168   |
| Pyb15_162  | SNP | 15 | 40.2 | scaffold154.0 | 645,485   |
| Pyd15_041  | SNP | 15 | 41.7 | scaffold3.0   | 565,227   |
| Pyb15_168  | SNP | 15 | 42.8 | scaffold111.0 | 121,668   |
| Pyb15_171  | SNP | 15 | 42.9 | scaffold159.0 | 143,280   |
| Pyb15_172  | SNP | 15 | 42.9 | scaffold159.0 | 693,515   |
| Pyb15_173  | SNP | 15 | 42.9 | scaffold316.0 | 86,414    |
| Pyb15_174  | SNP | 15 | 42.9 | scaffold111.0 | 45,537    |
| Pyb15_175  | SNP | 15 | 42.9 | scaffold159.0 | 180,593   |
| Pyb15_176  | SNP | 15 | 42.9 | scaffold111.0 | 28,781    |
| Pyb15_178  | SNP | 15 | 43.6 | scaffold46.0  | 329,239   |
| Pyb15_179  | SNP | 15 | 43.7 | scaffold46.0  | 329,503   |
| Pyb15_180  | SNP | 15 | 43.8 | scaffold46.0  | 375,381   |
| Pyb15_181  | SNP | 15 | 43.9 | scaffold46.0  | 406,039   |
| Pyb15_182  | SNP | 15 | 44.2 | scaffold46.0  | 1,008,436 |
| Pybd15_008 | SNP | 15 | 44.4 | scaffold111.0 | 129,682   |
| Pyb15_183  | SNP | 15 | 44.7 | scaffold64.0  | 439,391   |
| Pyb15_185  | SNP | 15 | 44.9 | scaffold360.0 | 325,973   |
| Pyb15_186  | SNP | 15 | 44.9 | scaffold360.0 | 335,004   |
| Pyb15_187  | SNP | 15 | 44.9 | scaffold64.0  | 262,811   |
| Pyb15_188  | SNP | 15 | 44.9 | scaffold64.0  | 345,323   |
| Pyb15_189  | SNP | 15 | 44.9 | scaffold64.0  | 449,052   |
| Pyb15_190  | SNP | 15 | 44.9 | scaffold46.0  | 1,002,984 |
| Pyb15_191  | SNP | 15 | 45.0 | scaffold64.0  | 196,478   |
| Pyb15_197  | SNP | 15 | 45.8 | scaffold64.0  | 1,075,145 |
| Pyb15_200  | SNP | 15 | 46.8 | scaffold154.0 | 419,062   |
| Pybd15_009 | SNP | 15 | 47.1 | scaffold159.0 | 110,983   |
| Pyb15_202  | SNP | 15 | 48.0 | scaffold172.0 | 517,011   |
| Pyb15_203  | SNP | 15 | 48.0 | scaffold172.0 | 717,156   |
| Pyb15_204  | SNP | 15 | 48.2 | scaffold172.0 | 511,529   |
| Pyb15_206  | SNP | 15 | 48.3 | scaffold172.0 | 638,366   |
| Pyb15_207  | SNP | 15 | 48.3 | scaffold172.0 | 542,892   |
| Pyb15_212  | SNP | 15 | 48.7 | scaffold172.0 | 322,716   |
| Pyd15_048  | SNP | 15 | 53.4 | scaffold172.0 | 244,505   |
| Pyd15_050  | SNP | 15 | 53.5 | scaffold172.0 | 325,342   |
| Pyd15_052  | SNP | 15 | 53.9 | scaffold250.0 | 391,269   |
| Pyd15_053  | SNP | 15 | 54.7 | scaffold23.0  | 387,548   |
| Pyb15_218  | SNP | 15 | 56.1 | scaffold64.0  | 1,111,997 |
| Pyb15_219  | SNP | 15 | 57.6 | scaffold250.0 | 287,146   |
| Pyb15_220  | SNP | 15 | 58.0 | scaffold172.0 | 581,920   |
| Pyd15_055  | SNP | 15 | 58.1 | scaffold457.0 | 352,481   |
| Pybd15_010 | SNP | 15 | 61.2 | scaffold360.0 | 215,773   |
| Pybd15_011 | SNP | 15 | 64.9 | scaffold64.0  | 48,421    |

---

|                   |            |           |      |                |                     |
|-------------------|------------|-----------|------|----------------|---------------------|
| Pyb15_224         | SNP        | 15        | 67.8 | scaffold64.0   | 154,453             |
| Pyb15_225         | SNP        | 15        | 68.9 | scaffold64.0   | 430,245             |
| Pyb15_235         | SNP        | 15        | 71.7 | scaffold172.0  | 700,168             |
| Pyb15_237         | SNP        | 15        | 72.2 | scaffold172.0  | 305,234             |
| Pyb15_239         | SNP        | 15        | 72.3 | scaffold172.0  | 293,674             |
| Pyb15_241         | SNP        | 15        | 72.5 | scaffold250.0  | 399,721             |
| Pyb15_242         | SNP        | 15        | 72.5 | scaffold968.0  | 91,145              |
| Pyb15_243         | SNP        | 15        | 72.6 | scaffold23.0   | 484,745             |
| Pyb15_245         | SNP        | 15        | 72.6 | scaffold250.0  | 62,828              |
| Pyb15_247         | SNP        | 15        | 72.8 | scaffold23.0   | 129,281             |
| Pyb15_250         | SNP        | 15        | 73.0 | scaffold23.0   | 536,619             |
| Pyb15_251         | SNP        | 15        | 73.1 | scaffold250.0  | 374,932             |
| Pyb15_252         | SNP        | 15        | 73.1 | scaffold172.0  | 210,087             |
| Pyb15_253         | SNP        | 15        | 73.1 | scaffold23.0   | 272,888             |
| Pyb15_254         | SNP        | 15        | 73.1 | scaffold968.0  | 82,988              |
| Pyb15_255         | SNP        | 15        | 73.2 | scaffold23.0   | 577,293             |
| Pyb15_256         | SNP        | 15        | 73.2 | scaffold250.0  | 340,019             |
| Pyb15_258         | SNP        | 15        | 73.3 | scaffold250.0  | 253,096             |
| Pyb15_259         | SNP        | 15        | 73.3 | scaffold250.0  | 335,280             |
| <b>CTG1063001</b> | <b>SSR</b> | <b>15</b> | 73.4 | scaffold23.0   | 371,078-371,275     |
| Pyb15_264         | SNP        | 15        | 74.3 | scaffold23.0   | 641,840             |
| Pyb15_265         | SNP        | 15        | 74.3 | scaffold23.0   | 827,926             |
| Pybd15_013        | SNP        | 15        | 74.4 | scaffold23.0   | 455,161             |
| Pyb15_269         | SNP        | 15        | 74.4 | scaffold23.0   | 1,058,823           |
| Pyb15_273         | SNP        | 15        | 74.5 | scaffold23.0   | 1,129,437           |
| <b>IPPN08</b>     | <b>SSR</b> | <b>15</b> | 74.5 | scaffold23.0   | 1,195,905-1,196,056 |
| Pyb15_275         | SNP        | 15        | 74.5 | scaffold23.0   | 750,525             |
| <b>CH01d08</b>    | <b>SSR</b> | <b>15</b> | 74.6 | scaffold23.0   | 536,654-536,945     |
| Pyb15_276         | SNP        | 15        | 74.6 | scaffold23.0   | 1,368,614           |
| Pyb15_278         | SNP        | 15        | 74.8 | scaffold23.0   | 914,465             |
| Pyb15_279         | SNP        | 15        | 74.9 | scaffold23.0   | 1,227,598           |
| Pyb15_281         | SNP        | 15        | 74.9 | scaffold23.0   | 969,138             |
| Pyb15_282         | SNP        | 15        | 74.9 | scaffold23.0   | 1,227,629           |
| Pyb15_284         | SNP        | 15        | 75.6 | scaffold1200.0 | 24,012              |
| Pyb15_286         | SNP        | 15        | 75.7 | scaffold23.0   | 1,426,750           |
| Pyb15_287         | SNP        | 15        | 75.8 | scaffold564.0  | 201,151             |
| Pyb15_291         | SNP        | 15        | 76.2 | scaffold1200.0 | 51,211              |
| Pyb15_293         | SNP        | 15        | 76.3 | scaffold1200.0 | 79,023              |
| Pyb15_294         | SNP        | 15        | 76.7 | scaffold564.0  | 249,419             |
| Pyb15_296         | SNP        | 15        | 77.4 | scaffold1200.0 | 51,273              |
| Pyb15_297         | SNP        | 15        | 77.8 | scaffold564.0  | 45,550              |
| Pyb15_298         | SNP        | 15        | 78.0 | scaffold564.0  | 56,437              |
| Pyb15_299         | SNP        | 15        | 78.0 | scaffold76.0   | 659,044             |
| Pyb15_303         | SNP        | 15        | 78.4 | scaffold76.0   | 837,871             |

|               |            |           |             |                     |                        |
|---------------|------------|-----------|-------------|---------------------|------------------------|
| Pyb15_304     | SNP        | 15        | 78.5        | scaffold76.0        | 483,316                |
| Pyb15_305     | SNP        | 15        | 78.5        | scaffold564.0       | 129,284                |
| Pyb15_306     | SNP        | 15        | 78.5        | scaffold564.0       | 149,961                |
| Pyb15_307     | SNP        | 15        | 78.5        | scaffold76.0        | 493,835                |
| Pyb15_309     | SNP        | 15        | 78.5        | scaffold76.0        | 1,030,249              |
| Pyb15_310     | SNP        | 15        | 78.5        | scaffold76.0        | 791,067                |
| Pyb15_311     | SNP        | 15        | 78.7        | scaffold76.0        | 450,143                |
| Pyb15_312     | SNP        | 15        | 78.9        | scaffold76.0        | 451,510                |
| Pyb15_314     | SNP        | 15        | 79.2        | scaffold66.0        | 315,318                |
| Pyb15_315     | SNP        | 15        | 79.3        | scaffold76.0        | 379,568                |
| Pyb15_316     | SNP        | 15        | 79.3        | scaffold76.0        | 373,843                |
| Pyb15_317     | SNP        | 15        | 79.5        | scaffold76.0        | 817,046                |
| Pyb15_318     | SNP        | 15        | 79.7        | scaffold76.0        | 551,810                |
| <b>NB129a</b> | <b>SSR</b> | <b>15</b> | <b>80.0</b> | <b>scaffold76.0</b> | <b>521,018-520,472</b> |
| Pyb15_322     | SNP        | 15        | 80.2        | scaffold76.0        | 240,941                |
| Pyb15_325     | SNP        | 15        | 80.6        | scaffold76.0        | 72,810                 |
| Pyb15_328     | SNP        | 15        | 80.6        | scaffold457.0       | 226,962                |
| Pyb15_330     | SNP        | 15        | 81.1        | scaffold211.0       | 267,428                |
| Pyb15_332     | SNP        | 15        | 81.6        | scaffold211.0       | 486,178                |
| Pyb15_334     | SNP        | 15        | 82.0        | scaffold211.0       | 322,927                |
| Pyb15_336     | SNP        | 15        | 82.0        | scaffold211.0       | 291,549                |
| Pyb15_339     | SNP        | 15        | 82.0        | scaffold211.0       | 219,251                |
| Pybd15_016    | SNP        | 15        | 88.8        | scaffold66.0        | 480,150                |
| Pybd15_017    | SNP        | 15        | 90.3        | scaffold76.0        | 881,124                |
| Pybd15_018    | SNP        | 15        | 91.0        | scaffold76.0        | 779,700                |
| Pyb15_343     | SNP        | 15        | 93.0        | scaffold66.0        | 299,726                |
| Pyd15_071     | SNP        | 15        | 94.5        | scaffold569.0       | 80,626                 |
| Pyb15_349     | SNP        | 15        | 97.9        | scaffold76.0        | 533,632                |
| Pyb15_350     | SNP        | 15        | 98.2        | scaffold66.0        | 214,671                |
| Pyb15_351     | SNP        | 15        | 98.3        | scaffold457.0       | 217,385                |
| Pyb15_352     | SNP        | 15        | 98.7        | scaffold211.0       | 566,189                |
| Pyb15_353     | SNP        | 15        | 99.1        | scaffold457.0       | 299,273                |
| Pyb15_354     | SNP        | 15        | 99.3        | scaffold332.0       | 33,244                 |
| Pyb15_355     | SNP        | 15        | 99.3        | scaffold332.0       | 413,464                |
| Pyb15_357     | SNP        | 15        | 99.6        | scaffold211.0       | 309,323                |
| Pybd15_022    | SNP        | 15        | 99.8        | scaffold258.0       | 535,862                |
| Pyb15_358     | SNP        | 15        | 100.0       | scaffold76.0        | 43,332                 |
| Pyb15_359     | SNP        | 15        | 100.0       | scaffold66.0        | 204,547                |
| Pyb15_361     | SNP        | 15        | 100.0       | scaffold457.0       | 317,270                |
| Pybd15_023    | SNP        | 15        | 100.5       | scaffold211.0       | 121,637                |
| Pyb15_365     | SNP        | 15        | 100.7       | scaffold211.0       | 110,406                |
| Pyb15_367     | SNP        | 15        | 101.0       | scaffold211.0       | 311,416                |
| Pyb15_368     | SNP        | 15        | 101.1       | scaffold332.0       | 123,618                |
| Pyb15_372     | SNP        | 15        | 101.4       | scaffold145.0       | 199,919                |



|                |            |           |       |                |                 |
|----------------|------------|-----------|-------|----------------|-----------------|
| Pyd15_074      | SNP        | 15        | 101.7 | scaffold122.0  | 641,950         |
| Pyb15_374      | SNP        | 15        | 101.9 | scaffold258.0  | 502,099         |
| Pyb15_377      | SNP        | 15        | 102.1 | scaffold520.0  | 106,902         |
| Pyb15_382      | SNP        | 15        | 102.2 | scaffold211.0  | 136,383         |
| Pyb15_384      | SNP        | 15        | 102.3 | scaffold294.0  | 402,744         |
| Pyb15_385      | SNP        | 15        | 102.3 | scaffold294.0  | 516,955         |
| Pyb15_386      | SNP        | 15        | 102.4 | scaffold145.0  | 158,354         |
| <b>EMPe104</b> | <b>SSR</b> | <b>15</b> | 102.5 | scaffold294.0  | 420,853-420,951 |
| Pyd15_078      | SNP        | 15        | 102.8 | scaffold361.0  | 323,354         |
| Pyb15_391      | SNP        | 15        | 103.3 | scaffold877.0  | 4,833           |
| Pyb15_392      | SNP        | 15        | 103.3 | scaffold686.0  | 221,459         |
| Pyb15_393      | SNP        | 15        | 103.3 | scaffold520.0  | 226,562         |
| Pyb15_394      | SNP        | 15        | 103.4 | scaffold226.0  | 26,754          |
| Pyb15_395      | SNP        | 15        | 103.4 | scaffold877.0  | 80,447          |
| Pyb15_398      | SNP        | 15        | 103.6 | scaffold226.0  | 445,261         |
| Pyb15_399      | SNP        | 15        | 103.6 | scaffold226.0  | 57,928          |
| Pyb15_400      | SNP        | 15        | 103.7 | scaffold226.0  | 456,342         |
| Pyb15_401      | SNP        | 15        | 103.7 | scaffold22.0   | 1,086,984       |
| Pyb15_403      | SNP        | 15        | 103.7 | scaffold226.0  | 351,966         |
| Pyb15_404      | SNP        | 15        | 104.0 | scaffold122.0  | 606,396         |
| Pybd15_026     | SNP        | 15        | 104.0 | scaffold520.0  | 325,569         |
| Pyb15_406      | SNP        | 15        | 104.4 | scaffold122.0  | 766,878         |
| Pyb15_408      | SNP        | 15        | 104.4 | scaffold122.0  | 778,998         |
| Pyb15_411      | SNP        | 15        | 104.5 | scaffold38.0   | 219,702         |
| Pyb15_413      | SNP        | 15        | 104.5 | scaffold38.0   | 218,323         |
| Pyb15_417      | SNP        | 15        | 104.8 | scaffold26.0   | 1,109,208       |
| Pyb15_420      | SNP        | 15        | 104.9 | scaffold122.0  | 693,460         |
| Pyb15_423      | SNP        | 15        | 104.9 | scaffold122.0  | 663,935         |
| Pyd15_088      | SNP        | 15        | 104.9 | scaffold858.0  | 53,096          |
| Pyb15_424      | SNP        | 15        | 104.9 | scaffold361.0  | 350,511         |
| Pyb15_425      | SNP        | 15        | 105.0 | scaffold361.0  | 160,692         |
| Pyb15_430      | SNP        | 15        | 105.5 | scaffold298.0  | 462,187         |
| Pybd15_028     | SNP        | 15        | 105.8 | scaffold686.0  | 6,696           |
| Pybd15_030     | SNP        | 15        | 106.8 | scaffold122.0  | 281,488         |
| Pyb15_438      | SNP        | 15        | 108.1 | scaffold1131.0 | 47,843          |
| Pybd15_031     | SNP        | 15        | 109.4 | scaffold361.0  | 49,208          |
| Pyb15_444      | SNP        | 15        | 110.7 | scaffold186.0  | 40,856          |
| Pyb15_445      | SNP        | 15        | 110.9 | scaffold437.0  | 259,392         |
| Pyb15_446      | SNP        | 15        | 110.9 | scaffold437.0  | 370,215         |
| Pyb15_447      | SNP        | 15        | 111.1 | scaffold186.0  | 5,501           |
| Pyb15_448      | SNP        | 15        | 111.2 | scaffold1512.0 | 503             |
| Pyb15_449      | SNP        | 15        | 111.2 | scaffold186.0  | 54,428          |
| Pyb15_450      | SNP        | 15        | 111.7 | scaffold437.0  | 110,521         |
| Pyb15_451      | SNP        | 15        | 111.9 | scaffold437.0  | 227,217         |

---

|            |     |    |       |                |           |
|------------|-----|----|-------|----------------|-----------|
| Pyb15_454  | SNP | 15 | 112.7 | scaffold376.0  | 412,311   |
| Pyb15_455  | SNP | 15 | 112.9 | scaffold376.0  | 412,324   |
| Pyb15_456  | SNP | 15 | 113.2 | scaffold312.2  | 158,343   |
| Pyb15_457  | SNP | 15 | 113.5 | scaffold376.0  | 140,870   |
| Pyb15_459  | SNP | 15 | 113.7 | scaffold620.0  | 5,241     |
| Pyb15_460  | SNP | 15 | 114.1 | scaffold399.0  | 396,807   |
| Pyd15_092  | SNP | 15 | 119.3 | scaffold38.0   | 1,120,900 |
| Pybd15_033 | SNP | 15 | 121.9 | scaffold361.0  | 49,265    |
| Pyb15_474  | SNP | 15 | 127.2 | scaffold298.0  | 485,729   |
| Pyb15_476  | SNP | 15 | 127.2 | scaffold122.0  | 397,245   |
| Pyb15_477  | SNP | 15 | 127.3 | scaffold298.0  | 404,173   |
| Pybd15_037 | SNP | 15 | 127.8 | scaffold858.0  | 48,849    |
| Pyb15_481  | SNP | 15 | 128.3 | scaffold481.0  | 238,652   |
| Pyb15_483  | SNP | 15 | 128.7 | scaffold481.0  | 296,708   |
| Pyb15_484  | SNP | 15 | 129.4 | scaffold1131.0 | 32,650    |
| Pyb15_485  | SNP | 15 | 129.4 | scaffold569.0  | 69,837    |
| Pyb15_486  | SNP | 15 | 129.4 | scaffold1131.0 | 47,874    |
| Pyb15_487  | SNP | 15 | 129.5 | scaffold537.0  | 308,264   |
| Pyb15_488  | SNP | 15 | 129.8 | scaffold537.0  | 269,980   |
| Pyb15_490  | SNP | 15 | 129.9 | scaffold141.0  | 63,584    |
| Pyb15_491  | SNP | 15 | 129.9 | scaffold141.0  | 335,868   |
| Pyb15_493  | SNP | 15 | 130.0 | scaffold1131.0 | 76,983    |
| Pyb15_496  | SNP | 15 | 131.2 | scaffold186.0  | 41,626    |
| Pyb15_497  | SNP | 15 | 132.5 | scaffold437.0  | 107,302   |
| Pyb15_505  | SNP | 15 | 138.2 | scaffold108.0  | 339,364   |
| Pyb15_507  | SNP | 15 | 139.0 | scaffold742.0  | 94,253    |
| Pyb15_508  | SNP | 15 | 139.3 | scaffold306.0  | 84,083    |
| Pyb15_509  | SNP | 15 | 139.3 | scaffold149.0  | 340,181   |
| Pyb15_510  | SNP | 15 | 139.3 | scaffold306.0  | 40,297    |
| Pyb15_514  | SNP | 15 | 139.8 | scaffold149.0  | 624,096   |
| Pyb15_518  | SNP | 15 | 140.0 | scaffold149.0  | 154,478   |
| Pyb15_522  | SNP | 15 | 140.2 | scaffold108.0  | 201,426   |
| Pyb15_523  | SNP | 15 | 140.2 | scaffold380.0  | 101,080   |
| Pyb15_525  | SNP | 15 | 140.3 | scaffold108.0  | 102,362   |
| Pyb15_528  | SNP | 15 | 140.4 | scaffold149.0  | 446,086   |
| Pyb15_532  | SNP | 15 | 140.5 | scaffold178.0  | 486,932   |
| Pyb15_536  | SNP | 15 | 141.2 | scaffold178.0  | 450,346   |
| Pyb15_541  | SNP | 15 | 141.5 | scaffold178.0  | 504,659   |
| Pyb15_545  | SNP | 15 | 141.9 | scaffold178.0  | 328,719   |
| Pyb15_546  | SNP | 15 | 141.9 | scaffold178.0  | 446,353   |
| Pyb15_547  | SNP | 15 | 142.3 | scaffold776.0  | 17,590    |
| Pyb15_548  | SNP | 15 | 142.7 | scaffold9.0    | 397,735   |
| Pyb15_549  | SNP | 15 | 143.1 | scaffold9.0    | 1,356,648 |
| Pyb15_551  | SNP | 15 | 143.5 | scaffold141.0  | 560,524   |

---

|                |            |           |       |                |               |
|----------------|------------|-----------|-------|----------------|---------------|
| Pyb15_557      | SNP        | 15        | 144.0 | scaffold141.0  | 485,994       |
| Pybd15_042     | SNP        | 15        | 148.3 | scaffold9.0    | 278,897       |
| Pyb15_565      | SNP        | 15        | 150.2 | scaffold100.0  | 455,771       |
| Pybd15_044     | SNP        | 15        | 153.9 | scaffold108.0  | 324,130       |
| Pybd15_046     | SNP        | 15        | 158.7 | scaffold742.0  | 157,659       |
| Pyb15_567      | SNP        | 15        | 158.9 | scaffold742.0  | 44,041        |
| Pyb15_568      | SNP        | 15        | 159.0 | scaffold306.0  | 90,697        |
| Pyb15_569      | SNP        | 15        | 159.0 | scaffold149.0  | 743,003       |
| Pyb15_570      | SNP        | 15        | 159.0 | scaffold108.0  | 169,555       |
| Pyb15_571      | SNP        | 15        | 159.0 | scaffold742.0  | 106,933       |
| Pyb15_572      | SNP        | 15        | 159.5 | scaffold756.0  | 205,828       |
| Pyb15_581      | SNP        | 15        | 160.9 | scaffold306.0  | 53,163        |
| Pyb15_585      | SNP        | 15        | 161.9 | scaffold178.0  | 344,987       |
| Pyb15_586      | SNP        | 15        | 161.9 | scaffold9.0    | 356,083       |
| Pyb15_587      | SNP        | 15        | 162.0 | scaffold9.0    | 1,245,729     |
| Pyb15_588      | SNP        | 15        | 162.4 | scaffold9.0    | 1,258,935     |
| Pyb15_589      | SNP        | 15        | 162.4 | scaffold9.0    | 294,160       |
| Pyb15_590      | SNP        | 15        | 162.5 | scaffold9.0    | 1,417,132     |
| Pyb15_591      | SNP        | 15        | 162.5 | scaffold9.0    | 1,258,984     |
| Pyd15_109      | SNP        | 15        | 162.6 | scaffold178.0  | 417,812       |
| Pyb15_592      | SNP        | 15        | 162.7 | scaffold9.0    | 514,207       |
| Pyb15_598      | SNP        | 15        | 163.8 | scaffold141.0  | 379,794       |
| Pyb15_602      | SNP        | 15        | 164.1 | scaffold141.0  | 485,961       |
| Pyb15_603      | SNP        | 15        | 164.2 | scaffold141.0  | 549,353       |
| Pyb15_608      | SNP        | 15        | 164.8 | scaffold141.0  | 454,650       |
| Pyb15_615      | SNP        | 15        | 165.7 | scaffold55.0   | 693,507       |
| Pyb15_617      | SNP        | 15        | 166.0 | scaffold55.0   | 850,102       |
| Pyb15_618      | SNP        | 15        | 166.0 | scaffold55.0   | 938,146       |
| Pyb15_622      | SNP        | 15        | 166.7 | scaffold55.0   | 701,721       |
| <b>CH02c09</b> | <b>SSR</b> | <b>15</b> | 166.8 | scaffold100.0  | 96,299-96,541 |
| Pyb15_625      | SNP        | 15        | 170.5 | scaffold100.0  | 482,667       |
| Pyb15_626      | SNP        | 15        | 170.5 | scaffold100.0  | 443,562       |
| Pyb15_627      | SNP        | 15        | 170.6 | scaffold100.0  | 776,453       |
| <b>NB102a</b>  | <b>SSR</b> | <b>15</b> | 170.7 | scaffold139.0  | 48,052-48,222 |
| Pyb15_629      | SNP        | 15        | 171.7 | scaffold33.0   | 436,696       |
| Pyb15_632      | SNP        | 15        | 172.6 | scaffold1074.0 | 114,548       |
| Pyb15_634      | SNP        | 15        | 172.7 | scaffold965.0  | 57,854        |
| Pyb15_636      | SNP        | 15        | 172.8 | scaffold1074.0 | 105,937       |
| Pyb15_642      | SNP        | 15        | 173.6 | scaffold31.0   | 799,009       |
| Pyb15_645      | SNP        | 15        | 174.2 | scaffold602.0  | 123,130       |
| Pyb15_646      | SNP        | 15        | 174.4 | scaffold31.0   | 827,278       |
| Pyb15_647      | SNP        | 15        | 174.4 | scaffold31.0   | 833,032       |
| Pyb15_648      | SNP        | 15        | 175.1 | scaffold146.0  | 516,693       |
| Pyb15_654      | SNP        | 15        | 176.4 | scaffold602.0  | 229,355       |

|                   |            |           |       |                |                     |
|-------------------|------------|-----------|-------|----------------|---------------------|
| Pyb15_655         | SNP        | 15        | 176.4 | scaffold31.0   | 1,176,048           |
| Pyb15_657         | SNP        | 15        | 176.5 | scaffold601.0  | 4,200               |
| Pyb15_659         | SNP        | 15        | 176.7 | scaffold602.0  | 109,134             |
| Pyb15_661         | SNP        | 15        | 176.8 | scaffold497.0  | 16,623              |
| Pyd16_002         | SNP        | 16        | 0.0   | scaffold2.0    | 2,422,213           |
| Pyd16_003         | SNP        | 16        | 0.3   | scaffold2.0    | 2,478,739           |
| <b>CN910353</b>   | <b>SSR</b> | <b>16</b> | 11.2  | scaffold488.0  | 315,599-315,035     |
| Pyb16_007         | SNP        | 16        | 11.9  | scaffold488.0  | 207,357             |
| Pyb16_014         | SNP        | 16        | 14.5  | scaffold1465.0 | 20,985              |
| Pyb16_016         | SNP        | 16        | 15.5  | scaffold179.0  | 480,149             |
| Pyd16_010         | SNP        | 16        | 15.9  | scaffold19.0   | 281,367             |
| <b>CH02d10a</b>   | <b>SSR</b> | <b>16</b> | 16.1  | scaffold19.0   | 1,020,644-1,020,242 |
| Pyd16_016         | SNP        | 16        | 17.2  | scaffold19.0   | 1,237,850           |
| Pyd16_017         | SNP        | 16        | 17.7  | scaffold2.0    | 3,484,424           |
| Pyd16_018         | SNP        | 16        | 17.7  | scaffold19.0   | 425,943             |
| Pyb16_025         | SNP        | 16        | 18.4  | scaffold885.0  | 134,031             |
| Pyb16_028         | SNP        | 16        | 19.2  | scaffold885.0  | 44,665              |
| Pyb16_029         | SNP        | 16        | 19.2  | scaffold885.0  | 44,693              |
| Pybd16_003        | SNP        | 16        | 20.6  | scaffold78.0   | 253,805             |
| Pyb16_044         | SNP        | 16        | 23.7  | scaffold1178.0 | 17,963              |
| Pyb16_049         | SNP        | 16        | 26.3  | scaffold78.0   | 324,864             |
| Pyb16_050         | SNP        | 16        | 26.3  | scaffold78.0   | 303,102             |
| Pyb16_052         | SNP        | 16        | 26.4  | scaffold78.0   | 301,320             |
| Pyb16_055         | SNP        | 16        | 26.5  | scaffold78.0   | 276,893             |
| Pybd16_004        | SNP        | 16        | 28.1  | scaffold78.0   | 80,703              |
| <b>AU301431</b>   | <b>SSR</b> | <b>16</b> | 28.1  | scaffold224.0  | 59,512-59,713       |
| Pyb16_058         | SNP        | 16        | 28.4  | scaffold78.0   | 426,466             |
| Pyb16_059         | SNP        | 16        | 28.7  | scaffold78.0   | 387,512             |
| Pyd16_028         | SNP        | 16        | 28.8  | scaffold71.0   | 1,074,866           |
| Pyb16_060         | SNP        | 16        | 29.9  | scaffold78.0   | 438,420             |
| Pyd16_030         | SNP        | 16        | 31.3  | scaffold78.0   | 528,123             |
| Pyd16_035         | SNP        | 16        | 34.5  | scaffold885.0  | 37,347              |
| <b>CTG1062447</b> | <b>SSR</b> | <b>16</b> | 51.6  | scaffold179.0  | 248,121-248,287     |
| Pyb16_071         | SNP        | 16        | 52.2  | scaffold179.0  | 316,101             |
| Pyb16_073         | SNP        | 16        | 52.3  | scaffold179.0  | 339,474             |
| Pyb16_075         | SNP        | 16        | 53.1  | scaffold488.0  | 301,705             |
| Pyb16_076         | SNP        | 16        | 53.6  | scaffold1553.0 | 20,662              |
| Pyb16_078         | SNP        | 16        | 55.0  | scaffold488.0  | 207,324             |
| Pybd16_005        | SNP        | 16        | 55.3  | scaffold60.0   | 90,108              |
| Pyb16_084         | SNP        | 16        | 57.2  | scaffold218.0  | 497,865             |
| Pyb16_085         | SNP        | 16        | 57.6  | scaffold284.0  | 403,074             |
| Pyb16_088         | SNP        | 16        | 58.6  | scaffold284.0  | 522,906             |
| Pyb16_091         | SNP        | 16        | 59.1  | scaffold184.0  | 174,758             |
| Pyb16_092         | SNP        | 16        | 59.2  | scaffold184.0  | 238,723             |

---

|           |     |    |      |                |           |
|-----------|-----|----|------|----------------|-----------|
| Pyd16_047 | SNP | 16 | 60.4 | scaffold185.0  | 434,482   |
| Pyb16_100 | SNP | 16 | 60.5 | scaffold184.0  | 238,679   |
| Pyb16_101 | SNP | 16 | 60.6 | scaffold184.0  | 215,935   |
| Pyb16_105 | SNP | 16 | 61.5 | scaffold306.0  | 24,660    |
| Pyb16_106 | SNP | 16 | 61.9 | scaffold1055.0 | 6,521     |
| Pyb16_108 | SNP | 16 | 62.3 | scaffold200.0  | 184,055   |
| Pyb16_110 | SNP | 16 | 62.7 | scaffold135.0  | 119,474   |
| Pyb16_116 | SNP | 16 | 65.8 | scaffold60.0   | 435,463   |
| Pyb16_120 | SNP | 16 | 66.6 | scaffold60.0   | 299,713   |
| Pyb16_122 | SNP | 16 | 66.7 | scaffold60.0   | 158,832   |
| Pyb16_123 | SNP | 16 | 67.0 | scaffold60.0   | 268,224   |
| Pyd16_055 | SNP | 16 | 67.0 | scaffold60.0   | 299,683   |
| Pyb16_124 | SNP | 16 | 67.1 | scaffold60.0   | 220,393   |
| Pyb16_125 | SNP | 16 | 67.2 | scaffold60.0   | 107,198   |
| Pyb16_130 | SNP | 16 | 68.5 | scaffold597.0  | 205,044   |
| Pyb16_135 | SNP | 16 | 72.0 | scaffold597.0  | 79,289    |
| Pyd16_056 | SNP | 16 | 72.7 | scaffold79.0   | 320,445   |
| Pyb16_138 | SNP | 16 | 72.7 | scaffold597.0  | 107,520   |
| Pyb16_140 | SNP | 16 | 72.9 | scaffold1133.0 | 28,732    |
| Pyb16_142 | SNP | 16 | 73.1 | scaffold1133.0 | 26,042    |
| Pyb16_143 | SNP | 16 | 73.1 | scaffold363.0  | 449,166   |
| Pyb16_144 | SNP | 16 | 73.1 | scaffold448.0  | 71,995    |
| Pyb16_149 | SNP | 16 | 73.6 | scaffold21.0   | 1,061,119 |
| Pyb16_153 | SNP | 16 | 73.9 | scaffold363.0  | 426,255   |
| Pyb16_156 | SNP | 16 | 73.9 | scaffold1496.0 | 9,507     |
| Pyb16_160 | SNP | 16 | 74.0 | scaffold79.0   | 252,937   |
| Pyd16_058 | SNP | 16 | 74.2 | scaffold79.0   | 315,964   |
| Pyb16_164 | SNP | 16 | 74.3 | scaffold79.0   | 516,431   |
| Pyb16_168 | SNP | 16 | 75.0 | scaffold555.0  | 184,259   |
| Pyb16_170 | SNP | 16 | 76.1 | scaffold796.0  | 9,338     |
| Pyb16_171 | SNP | 16 | 76.2 | scaffold392.0  | 102,845   |
| Pyb16_172 | SNP | 16 | 76.3 | scaffold68.0   | 1,092,790 |
| Pyb16_176 | SNP | 16 | 77.4 | scaffold77.0   | 128,404   |
| Pyb16_180 | SNP | 16 | 77.8 | scaffold77.0   | 283,109   |
| Pyb16_182 | SNP | 16 | 78.5 | scaffold77.0   | 712,004   |
| Pyb16_184 | SNP | 16 | 79.3 | scaffold187.0  | 619,376   |
| Pyb16_186 | SNP | 16 | 79.6 | scaffold219.0  | 465,599   |
| Pyb16_187 | SNP | 16 | 79.8 | scaffold187.0  | 372,394   |
| Pyb16_189 | SNP | 16 | 79.8 | scaffold187.0  | 313,661   |
| Pyb16_190 | SNP | 16 | 80.0 | scaffold187.0  | 620,977   |
| Pyb16_192 | SNP | 16 | 80.1 | scaffold187.0  | 679,740   |
| Pyb16_193 | SNP | 16 | 80.3 | scaffold219.0  | 499,150   |
| Pyb16_198 | SNP | 16 | 80.7 | scaffold187.0  | 621,029   |
| Pyb16_201 | SNP | 16 | 81.4 | scaffold130.0  | 676,592   |

---

|               |            |           |              |                |                 |
|---------------|------------|-----------|--------------|----------------|-----------------|
| Pyb16_203     | SNP        | 16        | 81.4         | scaffold130.0  | 453,261         |
| Pyd16_069     | SNP        | 16        | 98.2         | scaffold184.0  | 121,741         |
| Pyd16_073     | SNP        | 16        | 103.8        | scaffold179.0  | 295,915         |
| Pyd16_075     | SNP        | 16        | 106.2        | scaffold179.0  | 272,383         |
| Pyd16_081     | SNP        | 16        | 107.4        | scaffold928.0  | 104,820         |
| Pyd16_083     | SNP        | 16        | 107.4        | scaffold77.0   | 638,837         |
| Pyd16_093     | SNP        | 16        | 115.5        | scaffold555.0  | 238,804         |
| <b>NB123a</b> | <b>SSR</b> | <b>16</b> | <b>115.9</b> | scaffold555.0  | 101,484-102,343 |
| Pybd16_010    | SNP        | 16        | 125.4        | scaffold102.0  | 256,448         |
| Pybd16_011    | SNP        | 16        | 126.3        | scaffold694.0  | 187,032         |
| Pyb16_213     | SNP        | 16        | 127.0        | scaffold494.0  | 99,370          |
| Pyb16_214     | SNP        | 16        | 127.2        | scaffold21.0   | 1,084,427       |
| Pyb16_218     | SNP        | 16        | 127.5        | scaffold694.0  | 26,646          |
| Pyb16_221     | SNP        | 16        | 127.6        | scaffold694.0  | 114,124         |
| Pyb16_222     | SNP        | 16        | 127.6        | scaffold102.0  | 283,854         |
| Pyb16_225     | SNP        | 16        | 127.7        | scaffold694.0  | 201,169         |
| Pybd16_012    | SNP        | 16        | 127.9        | scaffold694.0  | 169,724         |
| Pyb16_231     | SNP        | 16        | 128.9        | scaffold750.0  | 44,174          |
| Pyb16_233     | SNP        | 16        | 128.9        | scaffold102.0  | 254,762         |
| Pyb16_236     | SNP        | 16        | 129.7        | scaffold102.0  | 141,380         |
| Pybd16_013    | SNP        | 16        | 130.1        | scaffold102.0  | 355,642         |
| Pyb16_240     | SNP        | 16        | 133.0        | scaffold1167.0 | 15,557          |
| Pyb16_242     | SNP        | 16        | 133.2        | scaffold79.0   | 559,038         |
| Pybd16_014    | SNP        | 16        | 134.6        | scaffold750.0  | 153,796         |
| Pybd16_015    | SNP        | 16        | 137.1        | scaffold694.0  | 87,898          |
| Pybd17_001    | SNP        | 17        | 0.0          | scaffold192.0  | 527,600         |
| <b>NH014a</b> | <b>SSR</b> | <b>17</b> | <b>0.9</b>   | scaffold129.0  | 700,785-700,704 |
| Pyb17_001     | SNP        | 17        | 4.6          | scaffold507.0  | 290,075         |
| Pyb17_002     | SNP        | 17        | 4.7          | scaffold528.0  | 298,095         |
| Pyb17_005     | SNP        | 17        | 5.2          | scaffold1096.0 | 72,741          |
| Pyb17_006     | SNP        | 17        | 5.4          | scaffold31.0   | 1,082,355       |
| Pyb17_009     | SNP        | 17        | 5.7          | scaffold192.0  | 608,438         |
| Pyd17_003     | SNP        | 17        | 5.8          | scaffold635.0  | 244,289         |
| Pyb17_012     | SNP        | 17        | 6.6          | scaffold129.0  | 553,294         |
| Pyb17_016     | SNP        | 17        | 7.2          | scaffold129.0  | 655,560         |
| Pyb17_030     | SNP        | 17        | 9.6          | scaffold34.0   | 291,746         |
| Pyd17_004     | SNP        | 17        | 9.9          | scaffold501.0  | 18,930          |
| Pyb17_034     | SNP        | 17        | 10.2         | scaffold34.0   | 298,127         |
| Pyb17_035     | SNP        | 17        | 10.3         | scaffold34.0   | 314,174         |
| Pyb17_037     | SNP        | 17        | 10.3         | scaffold658.0  | 20,750          |
| Pyb17_044     | SNP        | 17        | 11.0         | scaffold34.0   | 398,959         |
| Pyb17_045     | SNP        | 17        | 11.1         | scaffold34.0   | 1,030,265       |
| Pyb17_047     | SNP        | 17        | 11.2         | scaffold34.0   | 943,698         |
| Pyb17_048     | SNP        | 17        | 11.2         | scaffold34.0   | 1,004,380       |

|               |            |           |      |                |             |
|---------------|------------|-----------|------|----------------|-------------|
| Pyb17_049     | SNP        | 17        | 11.3 | scaffold34.0   | 339,417     |
| Pyb17_055     | SNP        | 17        | 11.6 | scaffold34.0   | 413,997     |
| Pyb17_057     | SNP        | 17        | 11.8 | scaffold34.0   | 979,931     |
| Pyb17_059     | SNP        | 17        | 11.9 | scaffold851.0  | 63,417      |
| Pybd17_005    | SNP        | 17        | 12.3 | scaffold658.0  | 216,488     |
| Pyb17_065     | SNP        | 17        | 12.7 | scaffold749.0  | 41,668      |
| Pyb17_066     | SNP        | 17        | 12.7 | scaffold851.0  | 22,577      |
| Pyb17_068     | SNP        | 17        | 13.1 | scaffold194.0  | 18,299      |
| Pybd17_006    | SNP        | 17        | 14.4 | scaffold194.0  | 101,187     |
| Pyb17_082     | SNP        | 17        | 15.0 | scaffold194.0  | 255,762     |
| Pyb17_083     | SNP        | 17        | 15.0 | scaffold194.0  | 288,110     |
| Pyb17_085     | SNP        | 17        | 15.6 | scaffold194.0  | 346,140     |
| Pyb17_086     | SNP        | 17        | 15.8 | scaffold194.0  | 271,252     |
| Pyb17_087     | SNP        | 17        | 16.1 | scaffold153.0  | 287,806     |
| Pyd17_012     | SNP        | 17        | 16.3 | scaffold194.0  | 306,894     |
| Pybd17_007    | SNP        | 17        | 16.6 | scaffold631.0  | 96,495      |
| Pyb17_089     | SNP        | 17        | 17.0 | scaffold611.0  | 144,841     |
| Pyb17_090     | SNP        | 17        | 17.1 | scaffold611.0  | 133,452     |
| Pyd17_013     | SNP        | 17        | 17.1 | scaffold348.0  | 269,837     |
| Pyb17_091     | SNP        | 17        | 17.1 | scaffold611.0  | 23,890      |
| Pyb17_093     | SNP        | 17        | 17.4 | scaffold153.0  | 230,359     |
| Pyb17_094     | SNP        | 17        | 17.4 | scaffold153.0  | 127,665     |
| Pyb17_095     | SNP        | 17        | 17.6 | scaffold153.0  | 99,662      |
| Pyb17_096     | SNP        | 17        | 17.7 | scaffold611.0  | 161,231     |
| Pyd17_018     | SNP        | 17        | 25.6 | scaffold192.0  | 566,848     |
| Pyd17_020     | SNP        | 17        | 28.3 | scaffold34.0   | 245,222     |
| Pyd17_022     | SNP        | 17        | 31.2 | scaffold34.0   | 737,102     |
| Pyd17_024     | SNP        | 17        | 31.7 | scaffold631.0  | 107,646     |
| Pyb17_098     | SNP        | 17        | 32.6 | scaffold85.0   | 454,780     |
| Pyb17_100     | SNP        | 17        | 33.0 | scaffold385.0  | 40,608      |
| Pyb17_102     | SNP        | 17        | 33.3 | scaffold194.0  | 18,235      |
| Pyb17_103     | SNP        | 17        | 33.4 | scaffold385.0  | 205,990     |
| Pyb17_106     | SNP        | 17        | 33.6 | scaffold385.0  | 179,489     |
| Pyb17_107     | SNP        | 17        | 33.9 | scaffold348.0  | 373,687     |
| Pyb17_109     | SNP        | 17        | 35.0 | scaffold34.0   | 502,824     |
| <b>NH008b</b> | <b>SSR</b> | <b>17</b> | 35.2 | scaffold884.0  | 5,324-5,622 |
| Pyb17_113     | SNP        | 17        | 35.8 | scaffold851.0  | 61,987      |
| Pyb17_114     | SNP        | 17        | 35.9 | scaffold34.0   | 1,064,356   |
| Pyb17_115     | SNP        | 17        | 36.4 | scaffold658.0  | 78,484      |
| Pyb17_122     | SNP        | 17        | 40.6 | scaffold507.0  | 142,060     |
| Pyb17_124     | SNP        | 17        | 40.9 | scaffold1096.0 | 83,628      |
| Pyd17_026     | SNP        | 17        | 41.2 | scaffold1695.0 | 3,186       |
| Pyd17_027     | SNP        | 17        | 41.2 | scaffold710.0  | 220,550     |
| Pyb17_134     | SNP        | 17        | 42.6 | scaffold884.0  | 6,906       |

---

|                |            |           |             |                      |                        |
|----------------|------------|-----------|-------------|----------------------|------------------------|
| Pyb17_137      | SNP        | 17        | 42.9        | scaffold11.0         | 1,704,667              |
| Pyb17_141      | SNP        | 17        | 44.9        | scaffold11.0         | 1,637,128              |
| Pyb17_145      | SNP        | 17        | 45.4        | scaffold501.0        | 206,396                |
| Pyb17_146      | SNP        | 17        | 45.5        | scaffold479.0        | 310,184                |
| Pyb17_147      | SNP        | 17        | 45.6        | scaffold476.0        | 229,560                |
| Pyb17_152      | SNP        | 17        | 47.4        | scaffold423.0        | 4,032                  |
| Pyb17_156      | SNP        | 17        | 47.5        | scaffold469.0        | 283,658                |
| Pyb17_160      | SNP        | 17        | 47.9        | scaffold8.0          | 329,412                |
| Pyd17_034      | SNP        | 17        | 48.4        | scaffold335.0        | 247,537                |
| Pyb17_165      | SNP        | 17        | 48.9        | scaffold8.0          | 174,382                |
| Pyb17_167      | SNP        | 17        | 49.1        | scaffold998.0        | 107,633                |
| Pyb17_169      | SNP        | 17        | 49.2        | scaffold8.0          | 266,996                |
| Pyb17_170      | SNP        | 17        | 49.8        | scaffold8.0          | 244,516                |
| Pyb17_175      | SNP        | 17        | 51.8        | scaffold406.0        | 259,920                |
| Pybd17_011     | SNP        | 17        | 52.9        | scaffold768.0        | 19,543                 |
| Pyb17_182      | SNP        | 17        | 55.6        | scaffold11.0         | 1,599,037              |
| Pybd17_012     | SNP        | 17        | 58.0        | scaffold192.0        | 534,785                |
| Pybd17_013     | SNP        | 17        | 58.3        | scaffold406.0        | 312,567                |
| Pybd17_014     | SNP        | 17        | 61.1        | scaffold11.0         | 726,302                |
| Pybd17_015     | SNP        | 17        | 61.2        | scaffold406.0        | 336,408                |
| Pybd17_017     | SNP        | 17        | 63.8        | scaffold524.0        | 109,242                |
| Pyd17_040      | SNP        | 17        | 67.3        | scaffold658.0        | 52,474                 |
| Pyd17_041      | SNP        | 17        | 68.8        | scaffold8.0          | 279,993                |
| Pyb17_195      | SNP        | 17        | 69.4        | scaffold323.0        | 470,405                |
| Pyd17_044      | SNP        | 17        | 70.9        | scaffold42.0         | 1,135,000              |
| Pyb17_196      | SNP        | 17        | 72.6        | scaffold1026.0       | 62,570                 |
| Pyd17_045      | SNP        | 17        | 75.0        | scaffold1371.0       | 38,197                 |
| Pybd17_019     | SNP        | 17        | 75.4        | scaffold1026.0       | 92,510                 |
| Pybd17_020     | SNP        | 17        | 80.1        | scaffold61.0         | 1,137,255              |
| Pyb17_206      | SNP        | 17        | 80.9        | scaffold335.0        | 225,017                |
| Pybd17_021     | SNP        | 17        | 81.4        | scaffold335.0        | 45,292                 |
| Pyb17_207      | SNP        | 17        | 81.8        | scaffold1230.0       | 59,473                 |
| <b>CH01h01</b> | <b>SSR</b> | <b>17</b> | <b>82.7</b> | <b>scaffold703.0</b> | <b>160,426-160,550</b> |
| Pybd17_022     | SNP        | 17        | 83.0        | scaffold524.0        | 42,834                 |
| Pyb17_209      | SNP        | 17        | 84.1        | scaffold11.0         | 890,184                |
| Pyb17_210      | SNP        | 17        | 84.1        | scaffold11.0         | 880,537                |
| Pyd17_057      | SNP        | 17        | 86.6        | scaffold524.0        | 118,622                |
| Pyb17_216      | SNP        | 17        | 86.8        | scaffold11.0         | 139,588                |
| Pyb17_218      | SNP        | 17        | 86.9        | scaffold11.0         | 609,904                |
| Pyd17_058      | SNP        | 17        | 86.9        | scaffold1026.0       | 62,626                 |
| Pyd17_062      | SNP        | 17        | 88.4        | scaffold703.0        | 207,111                |
| Pyd17_063      | SNP        | 17        | 88.4        | scaffold1430.0       | 14,953                 |
| Pybd17_025     | SNP        | 17        | 90.9        | scaffold323.0        | 446,005                |
| <b>CH05g03</b> | <b>SSR</b> | <b>17</b> | <b>95.9</b> | <b>scaffold245.0</b> | <b>164,785-164,956</b> |

---



|                 |            |           |       |                |               |
|-----------------|------------|-----------|-------|----------------|---------------|
| <b>NB110a</b>   | <b>SSR</b> | <b>17</b> | 99.0  | Not_anchored   | -             |
| Pyb17_219       | SNP        | 17        | 100.9 | scaffold201.0  | 216,817       |
| Pyb17_224       | SNP        | 17        | 101.8 | scaffold703.0  | 206,330       |
| Pyb17_225       | SNP        | 17        | 101.9 | scaffold245.0  | 221,283       |
| Pyb17_227       | SNP        | 17        | 102.2 | scaffold703.0  | 175,772       |
| Pyb17_228       | SNP        | 17        | 102.3 | scaffold703.0  | 202,449       |
| Pyb17_229       | SNP        | 17        | 102.3 | scaffold201.0  | 9,910         |
| Pyb17_232       | SNP        | 17        | 102.5 | scaffold245.0  | 171,351       |
| Pyb17_233       | SNP        | 17        | 102.5 | scaffold245.0  | 157,961       |
| Pyb17_234       | SNP        | 17        | 102.6 | scaffold201.0  | 185,372       |
| Pyb17_236       | SNP        | 17        | 102.8 | scaffold18.0   | 603,818       |
| Pyb17_237       | SNP        | 17        | 102.8 | scaffold201.0  | 235,598       |
| Pyb17_241       | SNP        | 17        | 104.0 | scaffold1348.0 | 38,174        |
| Pyb17_246       | SNP        | 17        | 104.7 | scaffold245.0  | 484,642       |
| Pyb17_247       | SNP        | 17        | 104.7 | scaffold1348.0 | 38,204        |
| Pyb17_253       | SNP        | 17        | 105.5 | scaffold80.0   | 37,294        |
| Pyb17_254       | SNP        | 17        | 105.5 | scaffold80.0   | 46,168        |
| Pyb17_255       | SNP        | 17        | 105.5 | scaffold80.0   | 740,058       |
| Pyb17_256       | SNP        | 17        | 105.5 | scaffold80.0   | 81,029        |
| Pyb17_257       | SNP        | 17        | 105.6 | scaffold422.0  | 177,175       |
| Pyb17_258       | SNP        | 17        | 105.6 | scaffold80.0   | 12,477        |
| Pyb17_259       | SNP        | 17        | 105.6 | scaffold269.0  | 1,132         |
| Pyb17_265       | SNP        | 17        | 106.0 | scaffold80.0   | 683,365       |
| Pyb17_266       | SNP        | 17        | 106.0 | scaffold587.0  | 118,974       |
| Pyb17_267       | SNP        | 17        | 106.0 | scaffold959.0  | 51,348        |
| Pyb17_268       | SNP        | 17        | 106.0 | scaffold80.0   | 9,733         |
| Pyb17_269       | SNP        | 17        | 106.1 | scaffold80.0   | 316,700       |
| Pyb17_270       | SNP        | 17        | 106.1 | scaffold80.0   | 983,863       |
| Pyb17_271       | SNP        | 17        | 106.1 | scaffold587.0  | 140,846       |
| Pyb17_272       | SNP        | 17        | 106.1 | scaffold422.0  | 353,595       |
| Pyb17_274       | SNP        | 17        | 106.1 | scaffold80.0   | 579,481       |
| Pyb17_275       | SNP        | 17        | 106.1 | scaffold80.0   | 187,607       |
| Pyb17_286       | SNP        | 17        | 107.2 | scaffold269.0  | 103,401       |
| Pybd17_031      | SNP        | 17        | 113.5 | scaffold18.0   | 513,216       |
| Pyb17_292       | SNP        | 17        | 118.2 | scaffold18.0   | 455,400       |
| Pyb17_296       | SNP        | 17        | 122.0 | scaffold703.0  | 53,174        |
| Pyb17_303       | SNP        | 17        | 124.8 | scaffold710.0  | 113,438       |
| Pyb17_305       | SNP        | 17        | 125.2 | scaffold1695.0 | 4,884         |
| Pyb17_306       | SNP        | 17        | 125.2 | scaffold88.0   | 738,248       |
| Pyb17_315       | SNP        | 17        | 127.9 | scaffold954.0  | 120,283       |
| <b>AT000174</b> | <b>SSR</b> | <b>17</b> | 129.4 | scaffold959.0  | 31,067-31,220 |
| Pyb17_324       | SNP        | 17        | 129.9 | scaffold18.0   | 181,394       |
| Pyb17_329       | SNP        | 17        | 130.4 | scaffold645.0  | 71,353        |
| Pyb17_330       | SNP        | 17        | 130.5 | scaffold18.0   | 372,134       |

|                |            |           |       |               |                 |
|----------------|------------|-----------|-------|---------------|-----------------|
| Pyb17_331      | SNP        | 17        | 130.6 | scaffold18.0  | 249,175         |
| Pyb17_332      | SNP        | 17        | 130.6 | scaffold18.0  | 352,775         |
| Pyb17_333      | SNP        | 17        | 130.6 | scaffold645.0 | 224,034         |
| Pyb17_334      | SNP        | 17        | 130.6 | scaffold645.0 | 201,665         |
| Pyb17_336      | SNP        | 17        | 130.9 | scaffold18.0  | 315,097         |
| Pyb17_337      | SNP        | 17        | 131.0 | scaffold18.0  | 260,407         |
| Pyb17_338      | SNP        | 17        | 131.0 | scaffold645.0 | 36,479          |
| Pyb17_339      | SNP        | 17        | 131.1 | scaffold18.0  | 259,021         |
| <b>CH04c06</b> | <b>SSR</b> | <b>17</b> | 131.5 | scaffold794.0 | 125,339-125,036 |
| Pybd17_034     | SNP        | 17        | 133.0 | scaffold18.0  | 325,329         |
| Pybd17_035     | SNP        | 17        | 133.5 | scaffold245.0 | 88,876          |
| Pyb17_342      | SNP        | 17        | 135.7 | scaffold80.0  | 72,474          |
| Pyb17_344      | SNP        | 17        | 136.0 | scaffold959.0 | 24,527          |
| Pyb17_345      | SNP        | 17        | 136.0 | scaffold959.0 | 142,063         |
| Pyb17_347      | SNP        | 17        | 136.0 | scaffold959.0 | 70,108          |
| Pyb17_349      | SNP        | 17        | 136.2 | scaffold422.0 | 214,456         |
| Pyb17_351      | SNP        | 17        | 136.6 | scaffold193.0 | 645,659         |
| Pyb17_358      | SNP        | 17        | 138.1 | scaffold794.0 | 104,087         |
| Pyb17_359      | SNP        | 17        | 139.2 | scaffold328.0 | 373,052         |
| Pyb17_360      | SNP        | 17        | 139.2 | scaffold328.0 | 352,940         |
| Pyb17_362      | SNP        | 17        | 139.2 | scaffold328.0 | 314,702         |
| Pyb17_363      | SNP        | 17        | 139.2 | scaffold328.0 | 373,107         |
| Pyb17_365      | SNP        | 17        | 139.8 | scaffold328.0 | 346,422         |
| Pybd17_037     | SNP        | 17        | 141.7 | scaffold328.0 | 442,827         |
| Pyb17_367      | SNP        | 17        | 142.3 | scaffold44.1  | 168,716         |
| Pyb17_369      | SNP        | 17        | 143.0 | scaffold269.0 | 178,716         |
| Pyb17_370      | SNP        | 17        | 143.0 | scaffold44.1  | 67,764          |
| Pybd17_040     | SNP        | 17        | 145.1 | scaffold328.0 | 442,777         |
| Pybd17_041     | SNP        | 17        | 145.2 | scaffold328.0 | 360,432         |
| Pybd17_042     | SNP        | 17        | 146.2 | scaffold80.0  | 19,753          |
| Pyd17_069      | SNP        | 17        | 148.3 | scaffold328.0 | 192,688         |
| Pyd17_071      | SNP        | 17        | 148.4 | scaffold214.0 | 84,938          |
| Pyd17_073      | SNP        | 17        | 148.4 | scaffold214.0 | 155,031         |

### **Supplemental figure llegend**

**Supplemental Figure S1.** Figure of ‘Bayuehong’ x ‘Dangshansuli’ genetic map constructed with 3,241 markers (3,143 SNPs and 98 SSRs).
